# Supplementary material for: Pentatomic carbon ring conjugated nitrogen-doped nanographene
Source: Royal Society of Chemistry journal article supplement (doi:10.1039/d3ma01082a), 2024-01-01
Supplement: d3ma01082a8.pdf [file d3ma01082a8.pdf]

## Supporting Information:

# Pentatomic Carbon Ring Conjugated Nitrogen-Doped Nanographene

Jinku Bai,<sup>a</sup> Xiao Xu,<sup>b</sup> Xin-Yue Wang,<sup>a</sup> Xin Sun,<sup>a</sup> Jiaqi Liang,<sup>a</sup> Tongling Liang<sup>c</sup> and Han-Yuan Gong<sup>\*a</sup>

[a] College of Chemistry, Beijing Normal University, No. 19, XinJieKouWai St, HaiDian District, Beijing 100875, China

[b] Goods and Material Department of CASIC Tertiary Research Institute, Building 30, No.1 Xili, Beiqu, Fengtai District, Beijing 100074, China

[c] Institute of Chemistry, Chinese Academy of Science, Beijing 100190, P. R. China; University of Chinese Academy of Sciences, Beijing 100049, China

\*Correspondence: [hanyuangong@bnu.edu.cn](mailto:hanyuangong@bnu.edu.cn) (H.-Y.G.)

## Table of Contents

**Section S1:** General considerations (pp. S3)

**Section S2:** Synthesis and characterization of 1,14-dichloro-6,9-dimethoxyquinolino [2',3',4':3,4] indeno-[2,1,7-ghi]phenanthridine (**1**) (pp. S4-S18)

**Section S3:** Metal cation coordination of **1** and **TB(phen)** in CH<sub>2</sub>Cl<sub>2</sub>/CH<sub>3</sub>OH (4:1, v/v) (pp. S19-S41)

**Section S4:** Electrochemical Study (pp. S42)

**Section S5:** Single crystals X-ray diffraction analyses of [**1**•Cd<sup>2+</sup>•(NO<sub>3</sub><sup>-</sup>)<sub>2</sub>]•2CH<sub>3</sub>OH and [**1**•Zn<sup>2+</sup>•(NO<sub>3</sub><sup>-</sup>)<sub>2</sub>]•CH<sub>3</sub>OH (pp. S43-S45)

**Section S6:** Theoretical Calculations (pp. S46-S58)

**Section S7:** Protonation study of **1** in CH<sub>2</sub>Cl<sub>2</sub>/CH<sub>3</sub>OH (pp. S59-S60)

## ***Section S1: General Considerations***

All solvents and reagents were purchased from Innochem, Hwrk, Chem, Energy Chemical or Cambridge Isotope Laboratories commercial suppliers and used without further purification.  $^1\text{H}$  and  $^{13}\text{C}$  NMR spectra were detected on 400 JNM-ECZ 400S or 600 JNM-ECZ 400S instrument. The  $^1\text{H}$  and  $^{13}\text{C}$  NMR chemical shifts are referenced to residual solvent signals ( $\text{CDCl}_3$ :  $\delta_{\text{H}} = 7.26$  ppm,  $\delta_{\text{C}} = 77.16$  ppm).<sup>1</sup> High resolution mass spectra (HMRS) were performed on AB SCIEX Triple TOF 56q00+ instrument. Uv-vis spectra were collected on a Shimadzu UV-2450 spectrometer. Fluorescence emission spectra were obtained with an Edinburgh Instruments FS5 spectrometer. Fluorescence lifetimes ( $\tau$ ) were detected on an Edinburgh Instruments FS980. Fluorescence quantum yields were obtained using a HAMAMATSU Quantaurus-QY instrument.

All single crystals used to obtain the X-ray diffraction structures reported in the text grew as yellow or red needle. The .cif documents are available as the separate supporting information files, which provide details regarding the specific crystals used for the analysis, along with the structures in question. Diffraction grade crystals were obtained via slowly evaporation from a mixture of  $\text{CH}_2\text{Cl}_2/\text{C}_2\text{H}_5\text{OH}$  or  $\text{ClCH}_2\text{CH}_2\text{Cl}/\text{CH}_3\text{OH}$  as described below.

The crystals used for single crystal analyses were cut from clusters of the corresponding crystals and had the approximate dimensions given in the .cif documents. The data were collected on XtalLAB Synergy diffractor. Data reduction was performed using CrysAlispro (Rigaku OD) software packages. The structures were refined by full-matrix least-squares on F<sup>2</sup> with anisotropic displacement parameters for the non-H atoms using SHELXL-2018/3.<sup>2-4</sup> Definitions used for calculating R(F), Rw(F<sup>2</sup>) and the goodness of fit, S, are given below and in the .cif documents.<sup>5</sup> Tables of positional and thermal parameters, bond lengths and angles, torsion angles, figures and lists of observed and calculated structure factors are located in the corresponding .cif documents available from the Cambridge Crystallographic Centre and may be obtained by quoting the CCDC ref. numbers 2305337, 2305338 and 2305344. The cif. documents also contain details of the crystal data, data collection, and structure refinement for each structure.

**Section S2: Synthesis and characterization of 1,14-dichloro-6,9-dimethoxyquinolino [2',3',4':3,4] indeno [2,1,7-ghi]phenanthridine (1)**

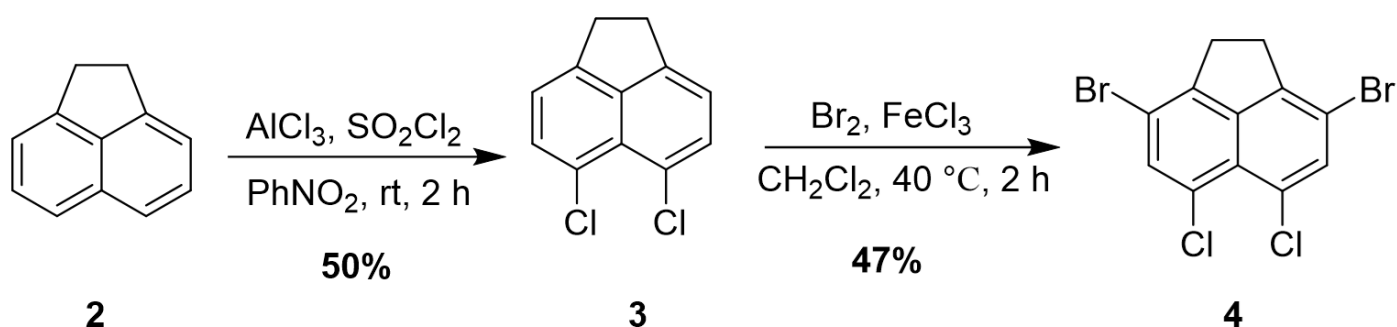

**Synthesis of 3,8-dibromo-5,6-dichloro-1,2-dihydroacenaphthylene **4**<sup>6</sup>**

According to the literature<sup>6</sup>, sulfuryl chloride (110.0 g, 66.0 mL, 815 mmol) was dropwise added to a solution containing acenaphthene (**2**) (60.0 g, 390 mmol) and aluminum chloride (10.4 g, 78.0 mmol) in nitrobenzene (250 mL) over 2 h. The solution was stirred for further 2 h and then poured into 600 mL mixture of methanol and water (5:1, v/v). The precipitate was collected, washed with methanol, and dried to generate a tan solid (43.3 g, 50% yield). <sup>1</sup>H NMR (400 MHz,  $\text{CDCl}_3$ )  $\delta$  (ppm): 7.49 (d,  $J = 7.6$  Hz, 2H), 7.15 (d,  $J = 7.6$  Hz, 2H), 3.33 (s, 4H).

Bromine (35.9 g, 22.4 mmol) was added in five portions (every 30 min) to a refluxing solution containing 5,6-dichloroacenaphthene **3** (25.0 g, 112 mmol) and ferric chloride (1.82 g, 11.2 mmol) in  $\text{CH}_2\text{Cl}_2$  (500 mL). Then the mixture kept stirring at reflux for 2 h, then cooled to ambient temperature, washed with water ( $2 \times 250$  mL), and evaporated. The brownish solid was triturated with methanol (250 mL) to give a light brown solid **4** (20.0 g, 47%). <sup>1</sup>H NMR (400 MHz,  $\text{CDCl}_3$ )  $\delta$  (ppm): 7.63 (s, 2H), 3.28 (s, 4H). The results are consistent with the literature<sup>6</sup>.



## Synthesis of 2,2'-(5,6-dichloro-1,2-dihydroacenaphthylene-3,8-diyl)bis(4,4,5,5-tetramethyl-1,3,2-dioxaborolane) **5**<sup>7</sup>

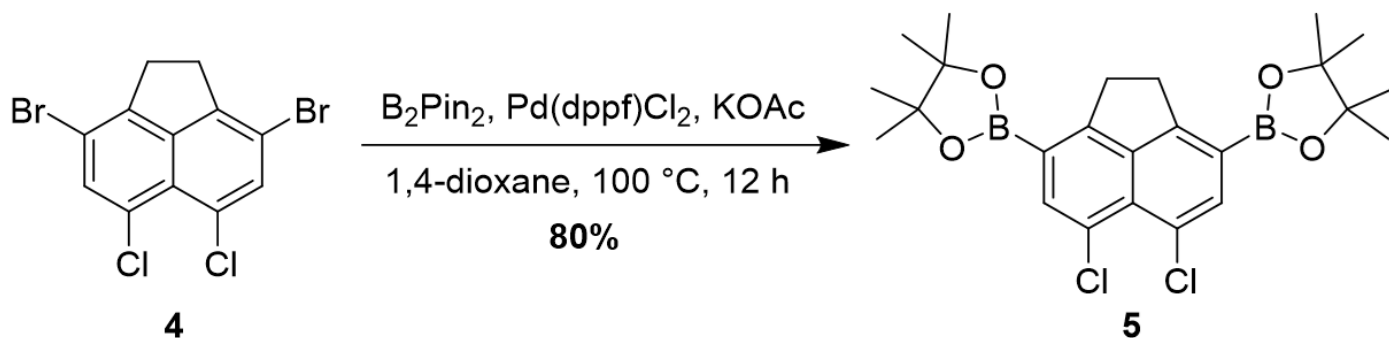

Under argon protection, a 500 mL three-necked flask was charged with 3,8-dibromo-5,6-dichloro-1,2-dihydroacenaphthylene **4** (7.62 g, 20.0 mmol),  $\text{B}_2\text{Pin}_2$  (15.2 g, 60.0 mmol),  $\text{Pd}(\text{dppf})\text{Cl}_2$  (730 mg, 1.00 mmol) and  $\text{KOAc}$  (19.6 g, 200 mmol). Then 200 mL 1,4-dioxane was added and the resulting mixture was heated at  $100\text{ }^\circ\text{C}$  for 12 h. The mixture was cooled to room temperature. The solvent was removed with rotary evaporator and the residue was diluted with 25 mL  $\text{CH}_2\text{Cl}_2$  and filtered through celite. The filtrate was concentrated. Then the crude product was purified via column chromatography (silica gel, 200-300 mesh; elute as petroleum ether (PE: B.P.,  $60\text{--}90\text{ }^\circ\text{C}$ )/ethyl acetate (EA), 2:1, v/v) to give compound **5** as a white solid (7.6 g, 80%). Mp:  $272\text{--}274\text{ }^\circ\text{C}$ .  $^1\text{H}$  NMR (400 MHz,  $\text{CDCl}_3$ )  $\delta$  (ppm): 7.91 (s, 2H), 3.47 (s, 4H), 1.37 (s, 24H).  $^{13}\text{C}$  NMR (100 MHz,  $\text{CDCl}_3$ )  $\delta$  (ppm): 156.8, 141.4, 137.6, 128.8, 125.2, 84.0, 31.9, 25.1; MALDI-TOF HRMS ( $m/z$ ):  $[\text{M}]^+$  calcd. for  $\text{C}_{24}\text{H}_{30}\text{B}_2\text{Cl}_2\text{O}_4$ , 474.1707; found: 474.1707.

## Synthesis of 5,6-dichloro-3,8-bis(3-methoxy-2-nitrophenyl)-1,2-dihydroacenaphthylene **7**

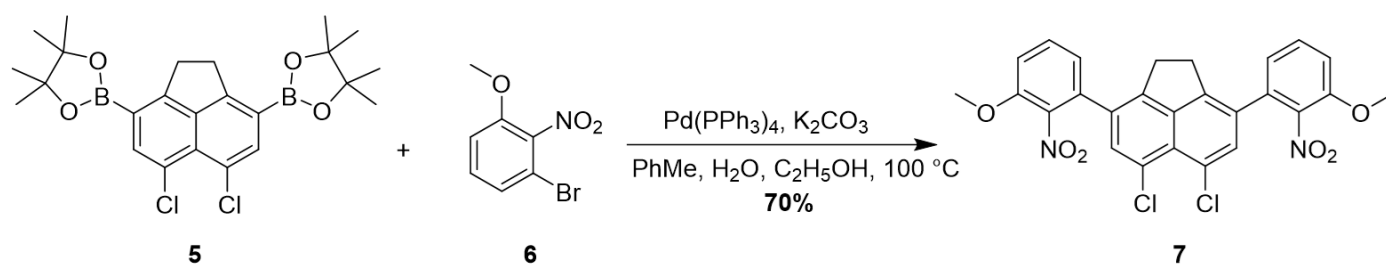

Under argon atmosphere, a 250 mL three-necked flask was charged with **5** (2.85 g, 6.00 mmol), **6** (3.48 g, 15.0 mmol),  $\text{Pd}(\text{PPh}_3)_4$  (416 mg, 0.360 mmol) and  $\text{K}_2\text{CO}_3$  (6.63 g, 48.0 mmol). Then 50 mL toluene, 1 mL water and 1 mL ethanol were added. The resulting mixture was heated at  $100\text{ }^\circ\text{C}$  for 12 h. Then the reaction was cooled to room temperature. After removing the solvent with rotary evaporator, the crude product was purified with flash chromatography (silica gel, 200-300 mesh; elute as PE/EA (5:1, v/v)) to afford compound **7** as a white solid (2.21 g, 70 %). Mp:  $242\text{--}246\text{ }^\circ\text{C}$ .  $^1\text{H}$  NMR (400 MHz,  $\text{CDCl}_3$ )  $\delta$  (ppm): 7.50 (t,  $J = 8.4\text{ Hz}$ , 2H), 7.46 (s, 2H), 7.10 (d,  $J = 7.6\text{ Hz}$ , 2H), 6.95 (d,  $J = 6.8\text{ Hz}$ , 2H), 3.96 (s, 6H), 3.15 (s, 4H).  $^{13}\text{C}$  NMR (100 MHz,  $\text{CDCl}_3$ )  $\delta$  (ppm): 151.1, 145.1, 141.6, 141.2, 132.9, 132.1, 131.2, 129.3, 126.8, 125.8, 122.1, 112.3, 56.6,

29.3; MALDI-TOF HRMS ( $m/z$ ):  $[M]^{+}$  calcd. for  $C_{26}H_{18}Cl_2N_2O_6$ , 524.0542; found: 524.0541.

### Synthesis of 5,6-dichloro-3,8-bis(3-methoxy-2-nitrophenyl)acenaphthylene-1,2-dione **8**<sup>6</sup>

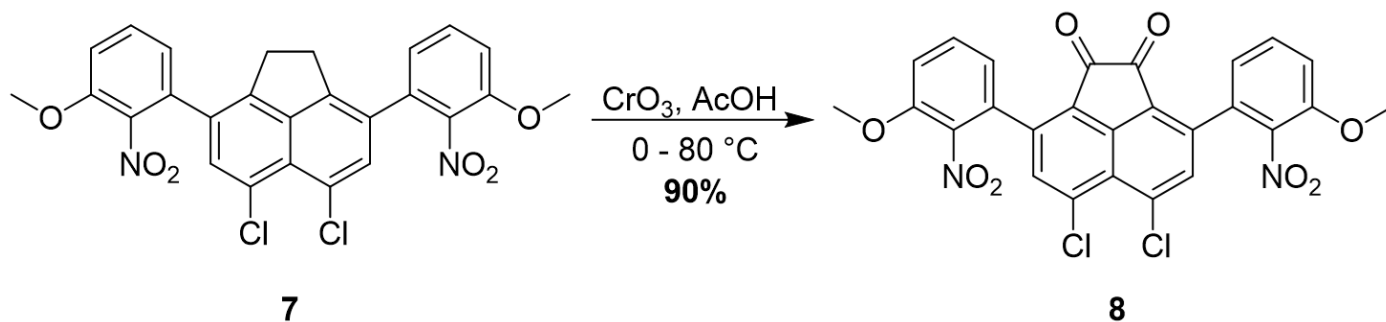

Chromium trioxide (1.43 g, 14.3 mmol) was added in three portions over 2 h to the vigorously stirred solution containing compound **7** (1.50 g, 2.86 mmol) and acetic anhydride (15.0 mL) at  $0\text{ }^{\circ}C$ . After carefully heated at  $80\text{ }^{\circ}C$  for 30 min, the mixture was poured into 1.50 L water and stirred for 30 min. The precipitate was collected and washed with water to yield a yellow solid (1.42 g, 90 %). Mp:  $338-340\text{ }^{\circ}C$ .  $^1H$  NMR (400 MHz,  $CDCl_3$ )  $\delta$  (ppm): 7.78 (s, 2H), 7.57 (t,  $J = 8.4$  Hz, 2H), 7.23 (d,  $J = 9.2$  Hz, 2H), 7.00 (d,  $J = 7.6$  Hz, 2H), 3.99 (s, 6H).  $^{13}C$  NMR (100 MHz,  $CDCl_3$ )  $\delta$  (ppm): 184.5, 151.2, 147.0, 140.1, 134.5, 133.7, 132.9, 132.4, 129.6, 126.7, 125.0, 123.3, 115.0, 57.4; MALDI-TOF HRMS ( $m/z$ ):  $[M + Na]^+$  calcd. for  $C_{26}H_{14}Cl_2N_2NaO_8$ , 575.0025; found: 575.0025.

### Synthesis of 1,14-dichloro-6,9-dimethoxyquinolino[2',3',4':3,4]indeno[2,1,7-*ghi*]phenanthridine (**1**)

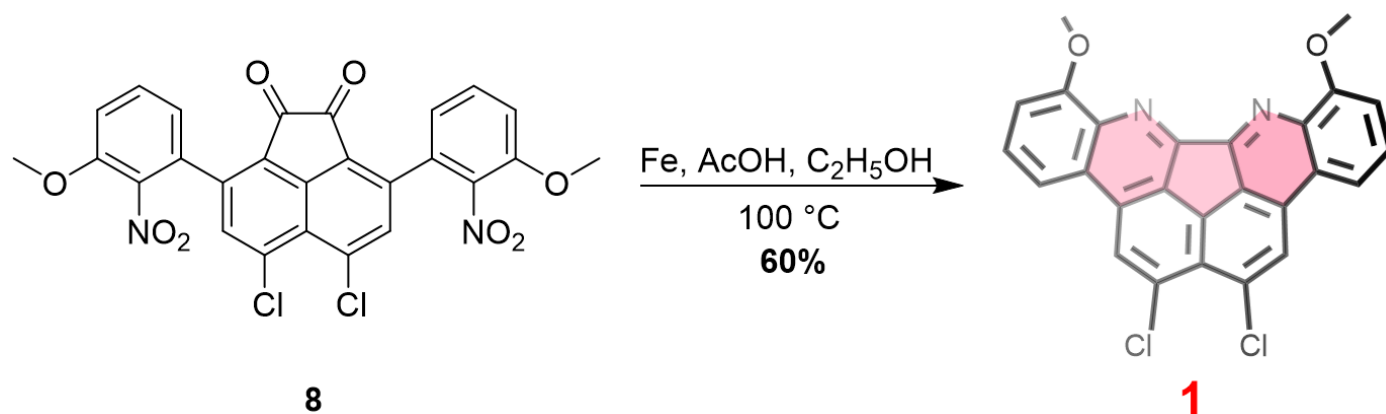

Under argon atmosphere, a 100 mL three-necked flask was charged with **8** (1.00 g, 1.81 mmol) and iron powder (2.00 g, 21.4 mmol). Then 10 mL ethanol and 20 mL acetic acid was added slowly with stirring. The resulting mixture was heated at  $100\text{ }^{\circ}C$  for 2 h. Then it was cooled to room temperature, filtered through a short celite plug. The solution was neutralized with  $NaHCO_3$  aq. and extracted with  $CH_2Cl_2$  ( $3 \times 100$  mL). Organic phases were combined and dried with  $Na_2SO_4$ . After removing the solvent with rotary evaporator, the crude product was purified with flash column chromatography (neutral alumina (200-300 mesh); elute as

CH<sub>2</sub>Cl<sub>2</sub>) to obtain **1** (500 mg, 60%) as a yellow powder. Mp: > 360°C. <sup>1</sup>H NMR (400 MHz, CDCl<sub>3</sub>) δ (ppm): 8.65 (d, *J* = 1.6 Hz, 2H), 8.28 (s, *J* = 5.6 Hz, 2H), 8.16 (m, 2H), 7.62 (d, *J* = 5.6 Hz, 2H), 4.29 (s, 6H). <sup>13</sup>C NMR (100 MHz, CDCl<sub>3</sub>/TFA-*d* (4:1, v/v)) δ (ppm): 154.2, 144.3, 136.7, 136.5, 134.6, 130.5, 128.3, 127.7, 127.5, 126.9, 126.1, 117.3, 114.4, 57.6. HRMS (ESI) calcd. for C<sub>26</sub>H<sub>14</sub>Cl<sub>2</sub>N<sub>2</sub>O<sub>2</sub> [M + H]<sup>+</sup>: 457.0511; found: 457.0502.

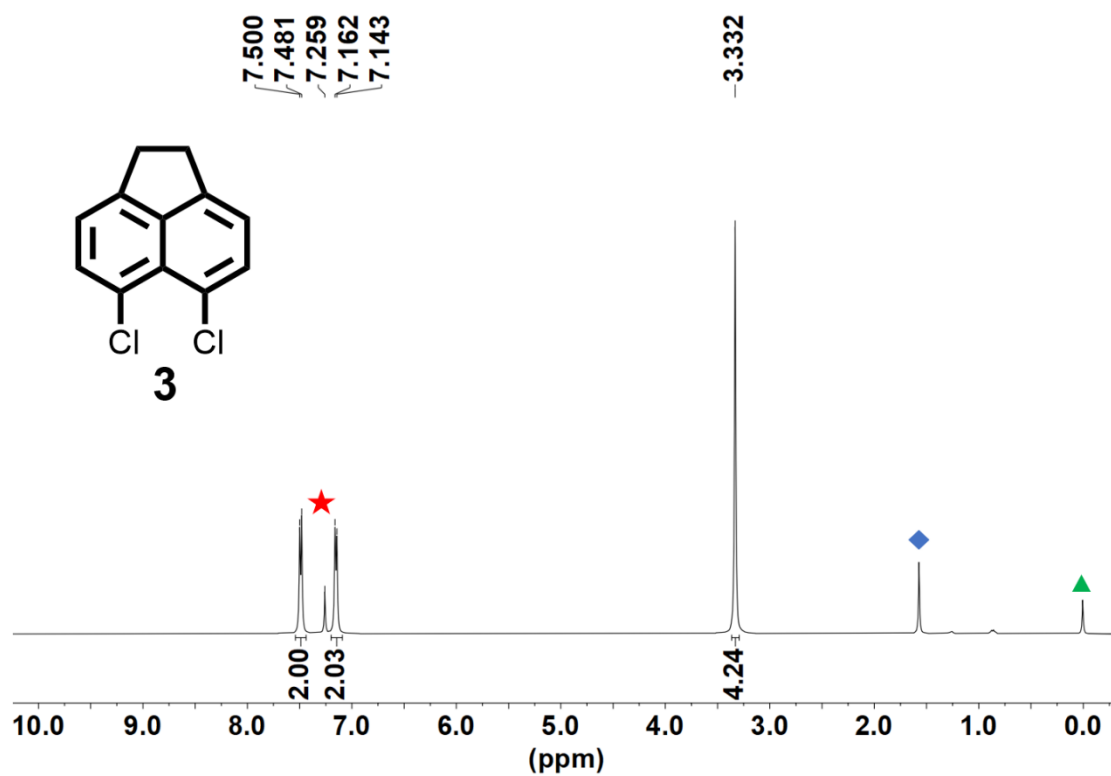

**Figure S1.** <sup>1</sup>H NMR spectrum of **3** in CDCl<sub>3</sub> at 298 K (400 MHz) (red “★” represents residual CHCl<sub>3</sub>; blue “◆” represents H<sub>2</sub>O; green “▲” represents TMS).

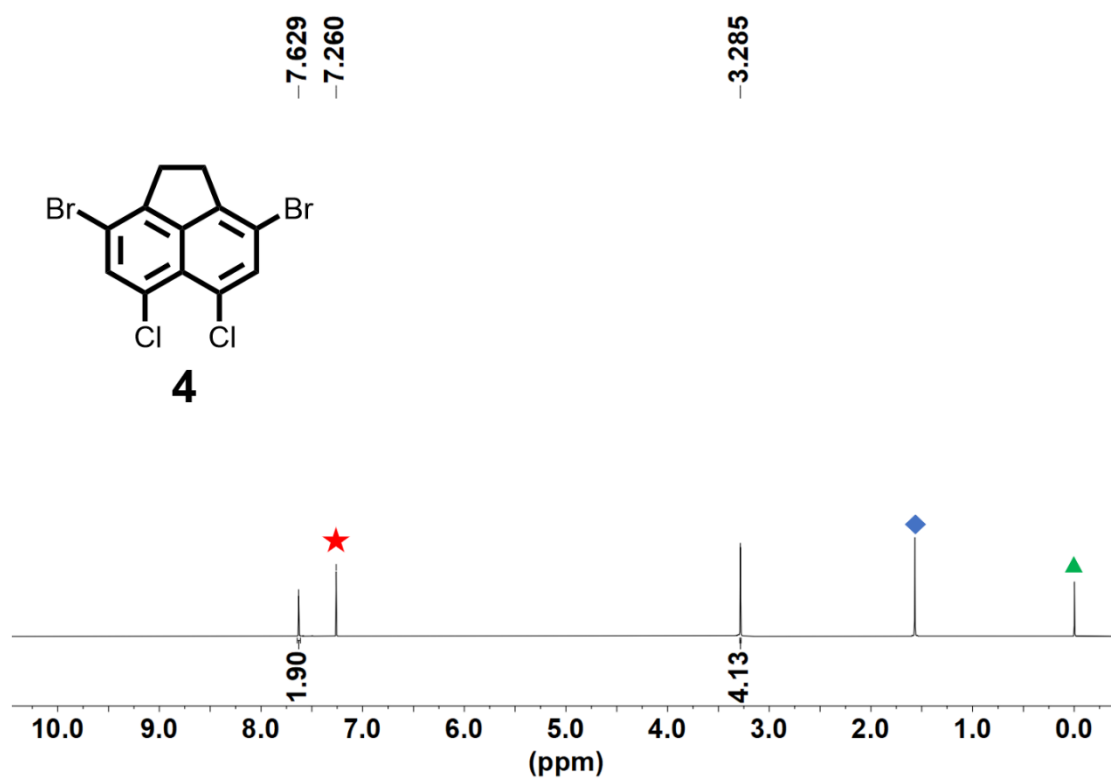

**Figure S2.** <sup>1</sup>H NMR spectrum of **4** in CDCl<sub>3</sub> at 298 K (400 MHz) (red “★” represents residual CHCl<sub>3</sub>; blue “◆” represents H<sub>2</sub>O; green “▲” represents TMS).

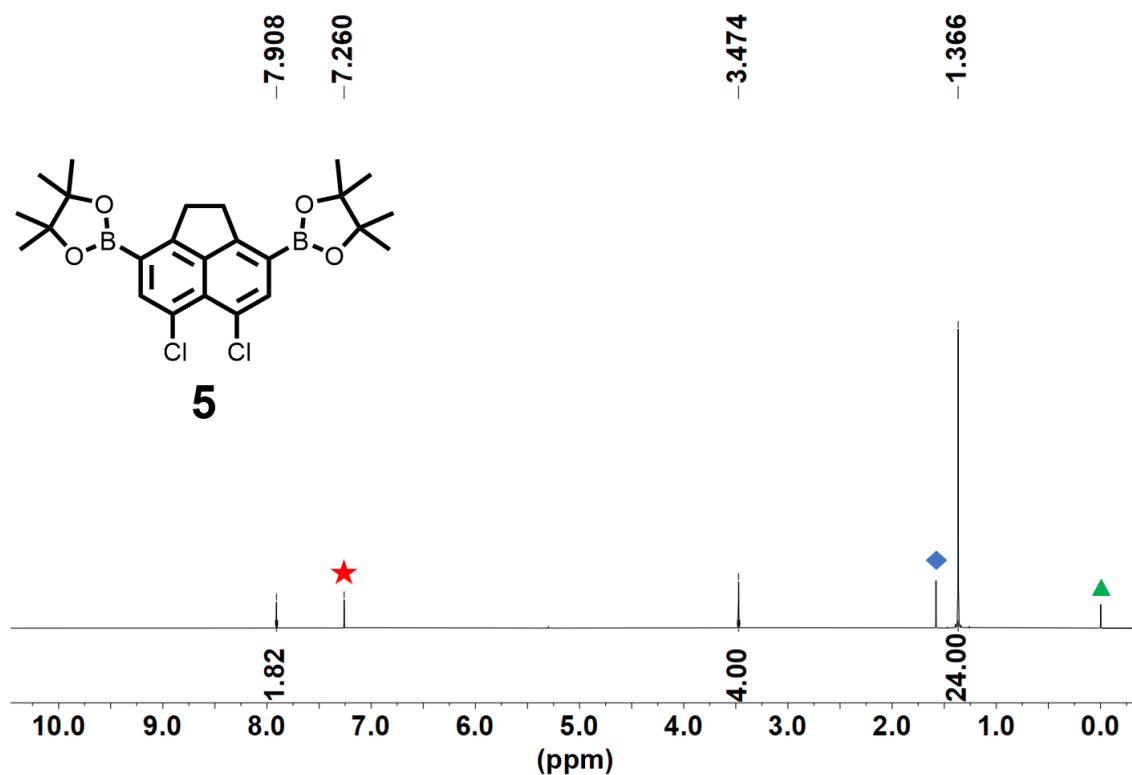

**Figure S3.**  $^1\text{H}$  NMR spectrum of **5** in  $\text{CDCl}_3$  at 298 K (400 MHz) (red “★” represents residual  $\text{CHCl}_3$ ; blue “◆” represents  $\text{H}_2\text{O}$ ; green “▲” represents TMS).

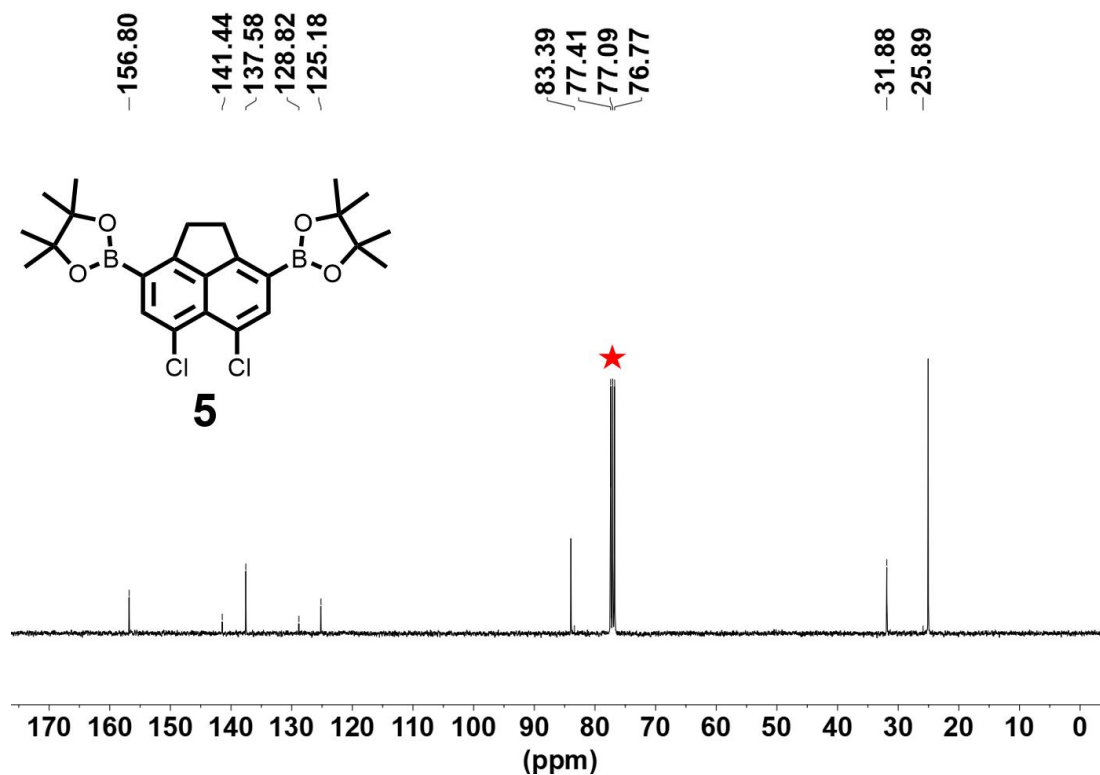

**Figure S4.**  $^{13}\text{C}$  NMR spectrum of **5** in  $\text{CDCl}_3$  at 298 K (100 MHz) (red “★” represents residual  $\text{CHCl}_3$ ).

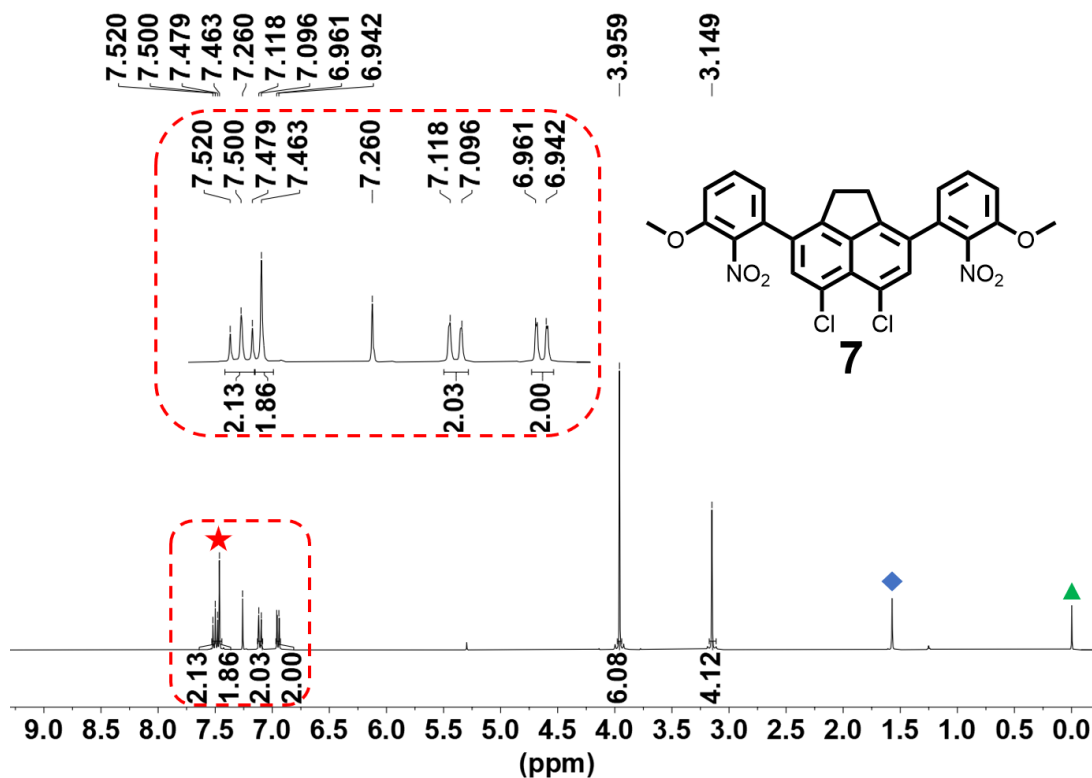

**Figure S5.** <sup>1</sup>H NMR spectrum of **7** in CDCl<sub>3</sub> at 298 K (400 MHz) (red “★” represents residual CHCl<sub>3</sub>; blue “◆” represents H<sub>2</sub>O; green “▲” represents TMS).

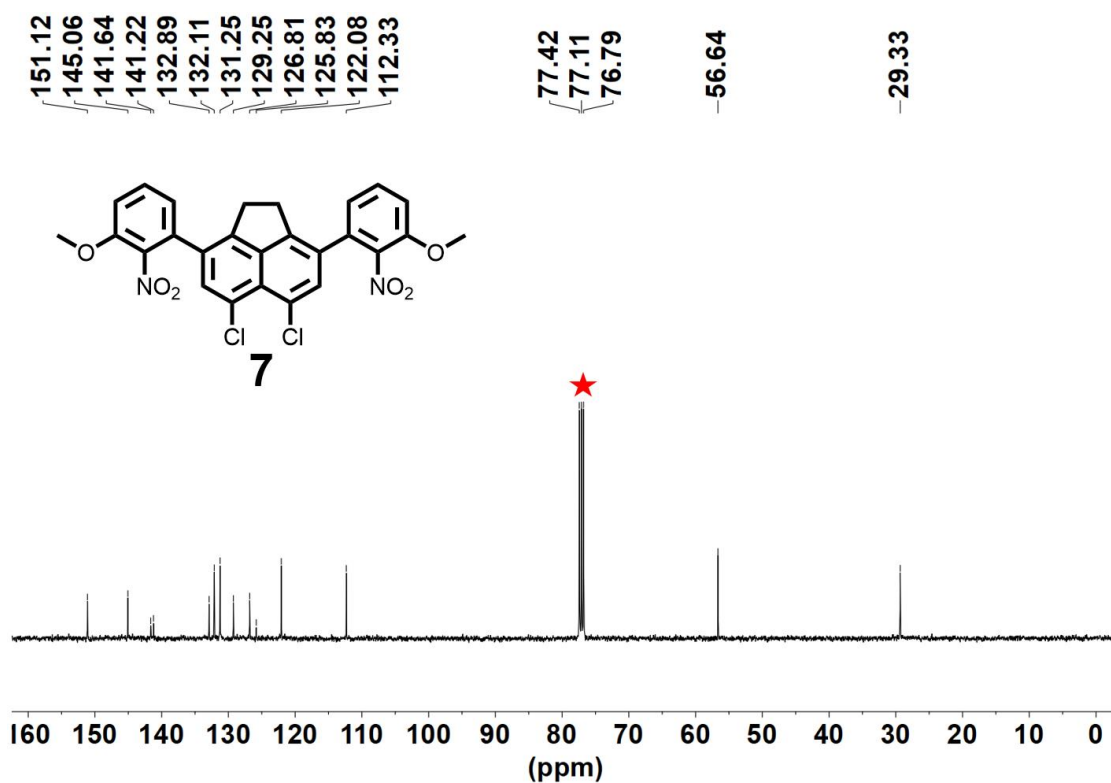

**Figure S6.** <sup>13</sup>C NMR spectrum of **7** in CDCl<sub>3</sub> at 298 K (100 MHz) (red “★” represents residual CHCl<sub>3</sub>).

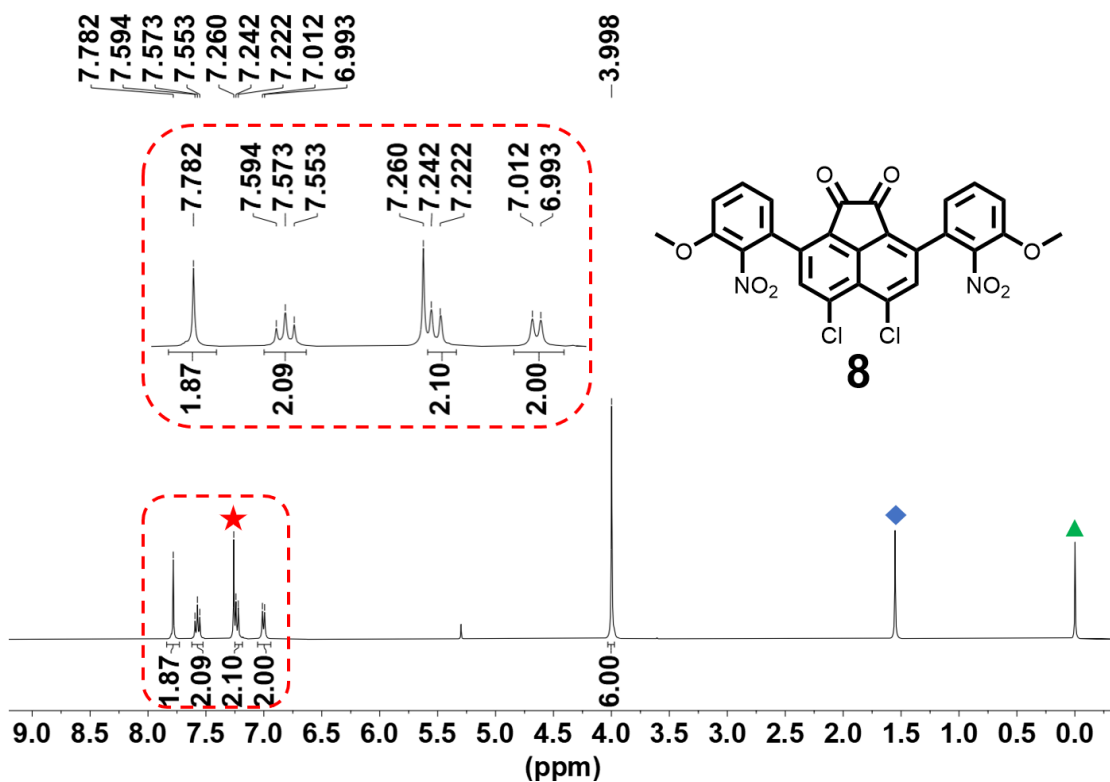

**Figure S7.** <sup>1</sup>H NMR spectrum of **8** in CDCl<sub>3</sub> at 298 K (400 MHz) (red “★” represents residual CHCl<sub>3</sub>; blue “◆” represents H<sub>2</sub>O; green “▲” represents TMS).

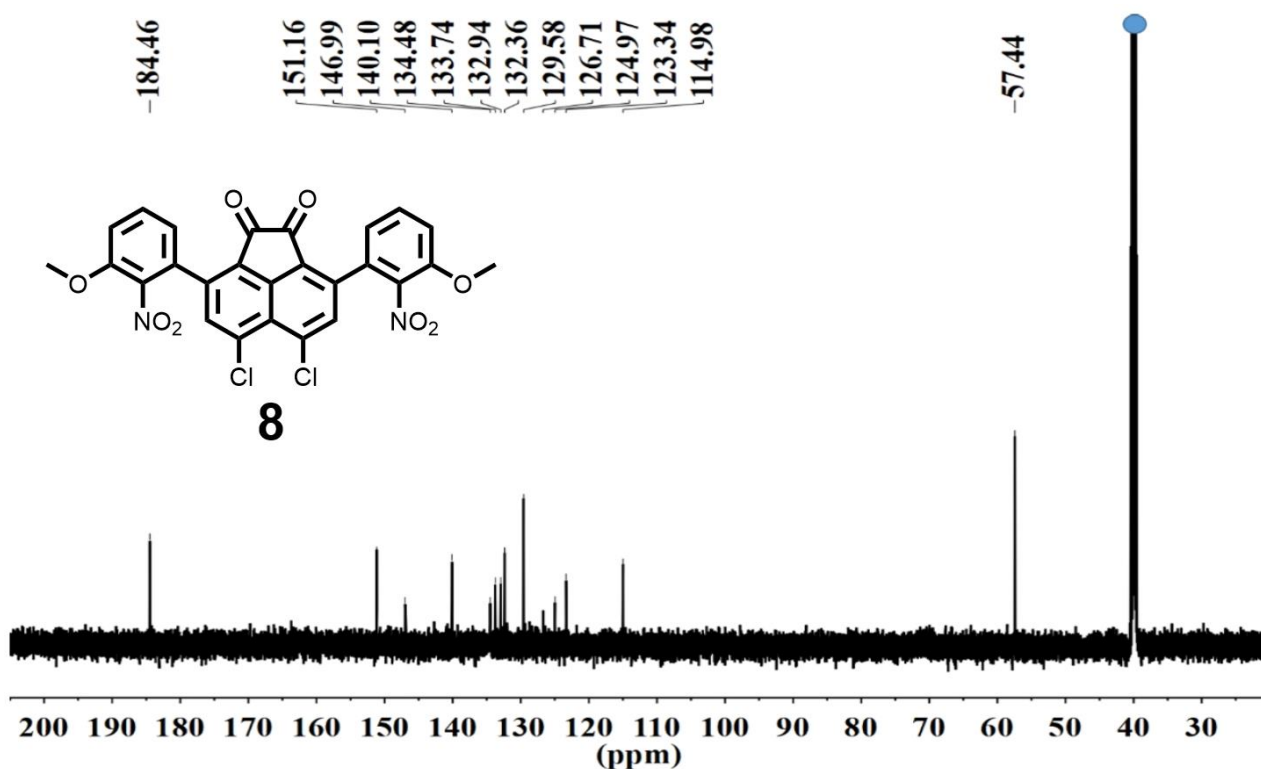

**Figure S8.** <sup>13</sup>C NMR spectrum of **8** in DMSO-*d*<sub>6</sub> at 298 K (100 MHz) (blue “●” represents residual DMSO).

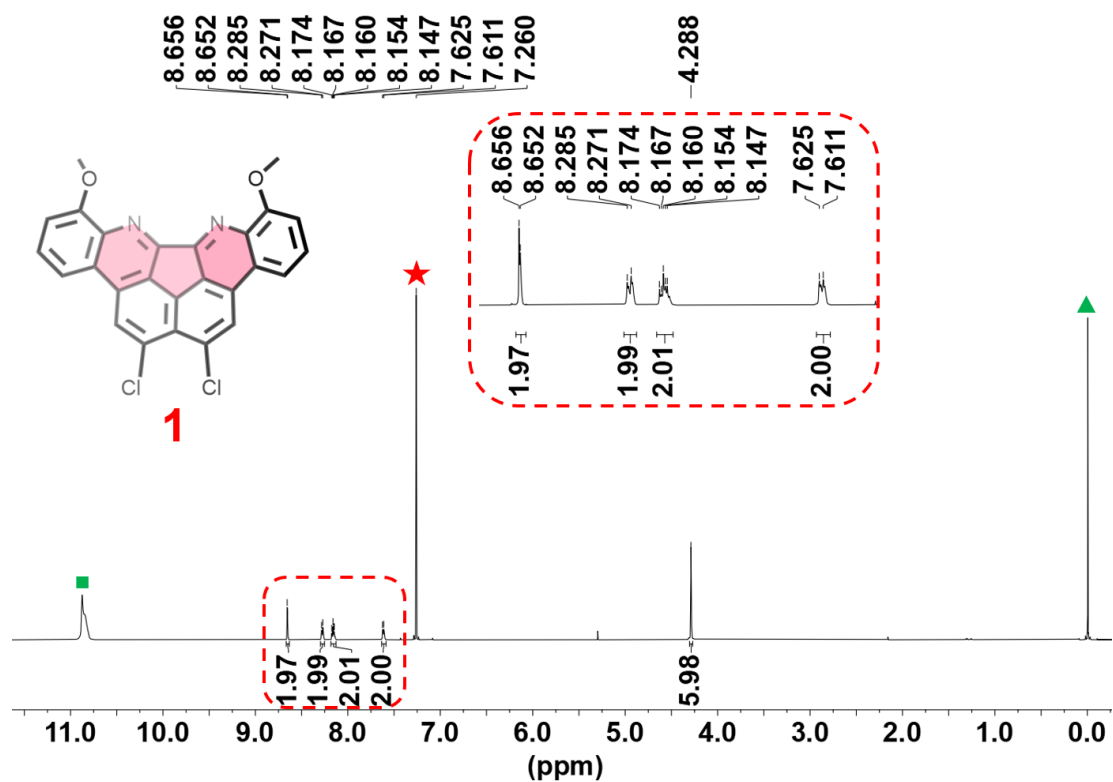

**Figure S9.** <sup>1</sup>H NMR spectrum of **1** in CDCl<sub>3</sub>/TFA (2:1, v/v) at 298 K (400 MHz) (red “★” represents residual CHCl<sub>3</sub>; green “▲” represents TMS ; green “■” represents TFA).

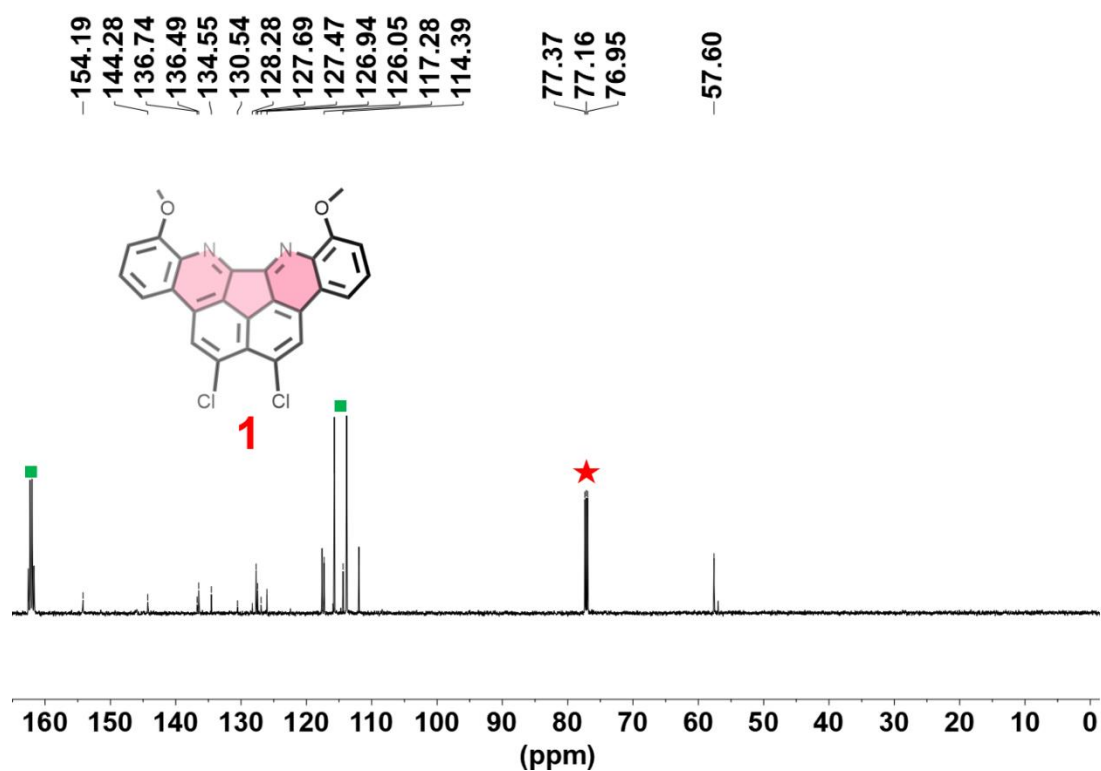

**Figure S10.** <sup>13</sup>C NMR spectrum of **1** in CDCl<sub>3</sub>/TFA-*d* (2:1, v/v) at 298 K (100 MHz) (red “★” represents residual CHCl<sub>3</sub>, green “■” represents TFA).



## Mass Spectra

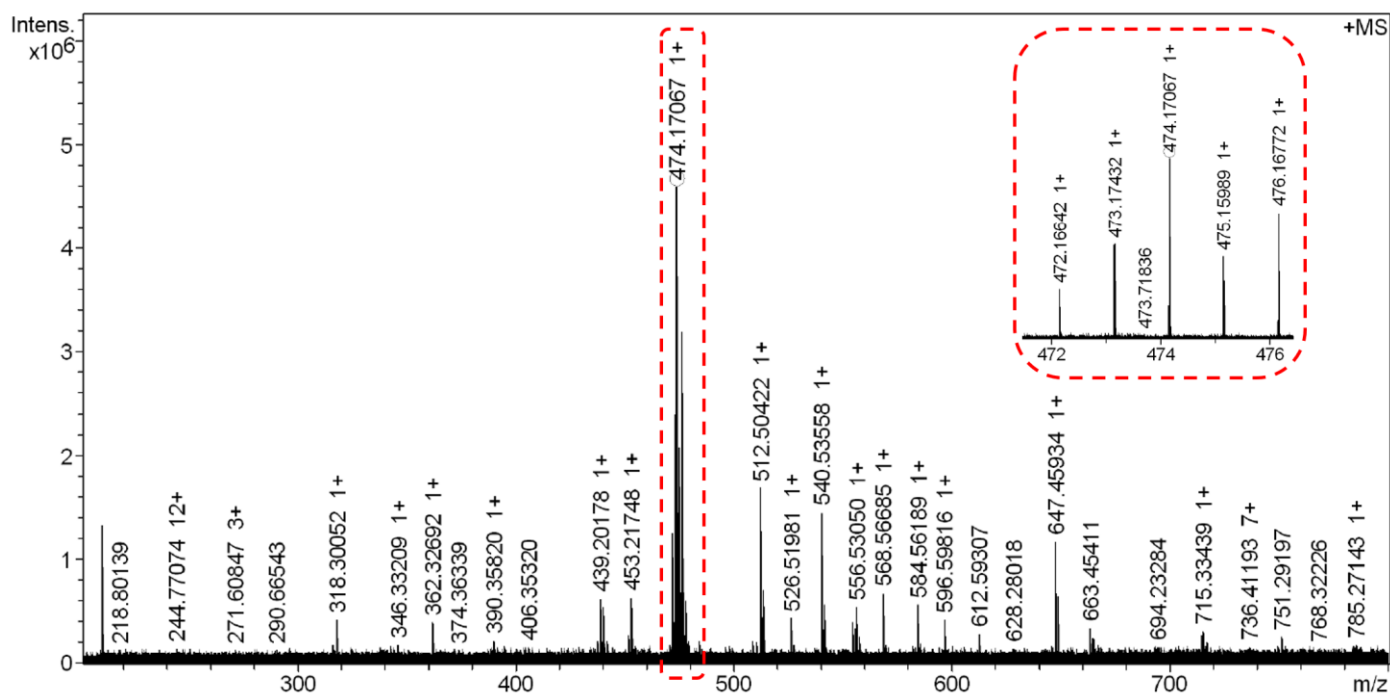

**Figure S11.** Positive MALDI-TOF HRMS spectrum of **4**. MALDI-TOF HRMS ( $m/z$ ):  $[M]^+$  calcd. for  $C_{24}H_{30}B_2Cl_2O_4$ , 474.1707; found: 474.1707.

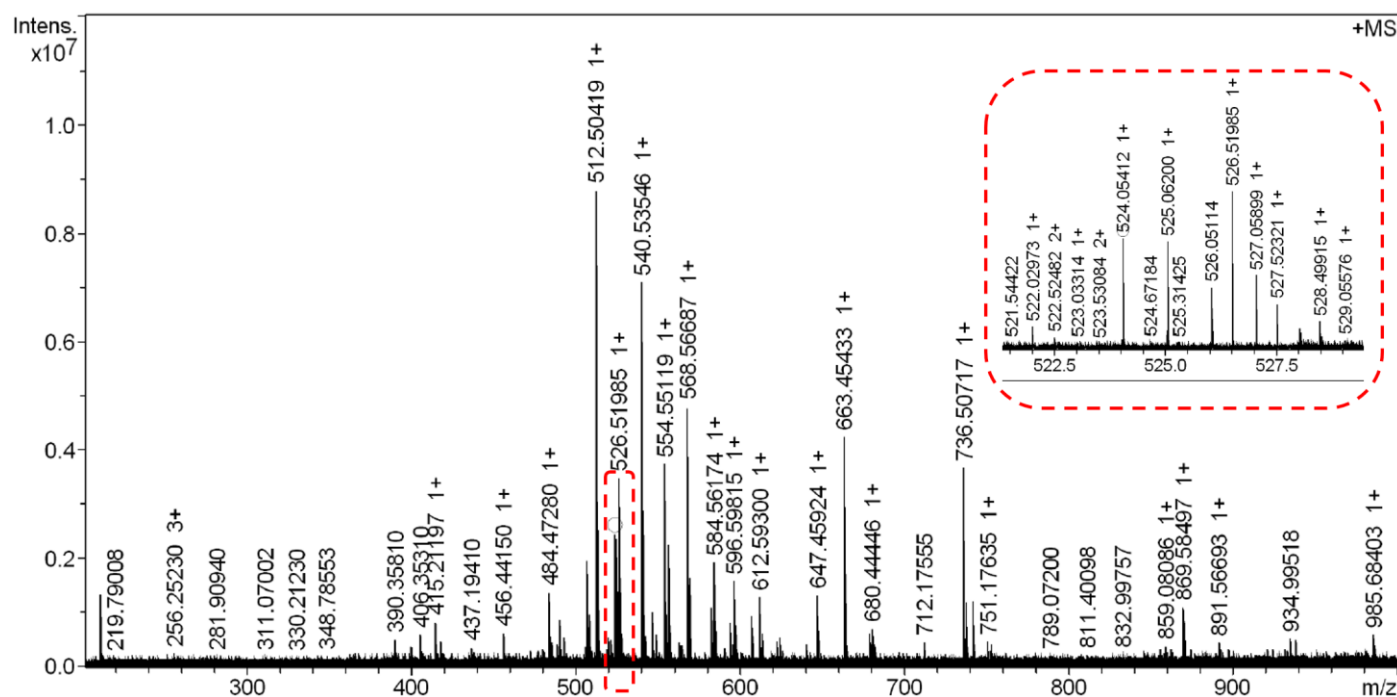

**Figure S12.** Positive MALDI-TOF HRMS spectrum of **6**. MALDI-TOF HRMS ( $m/z$ ):  $[M]^+$  calcd. for  $C_{26}H_{18}Cl_2N_2O_6$ , 524.0542; found: 524.0541.

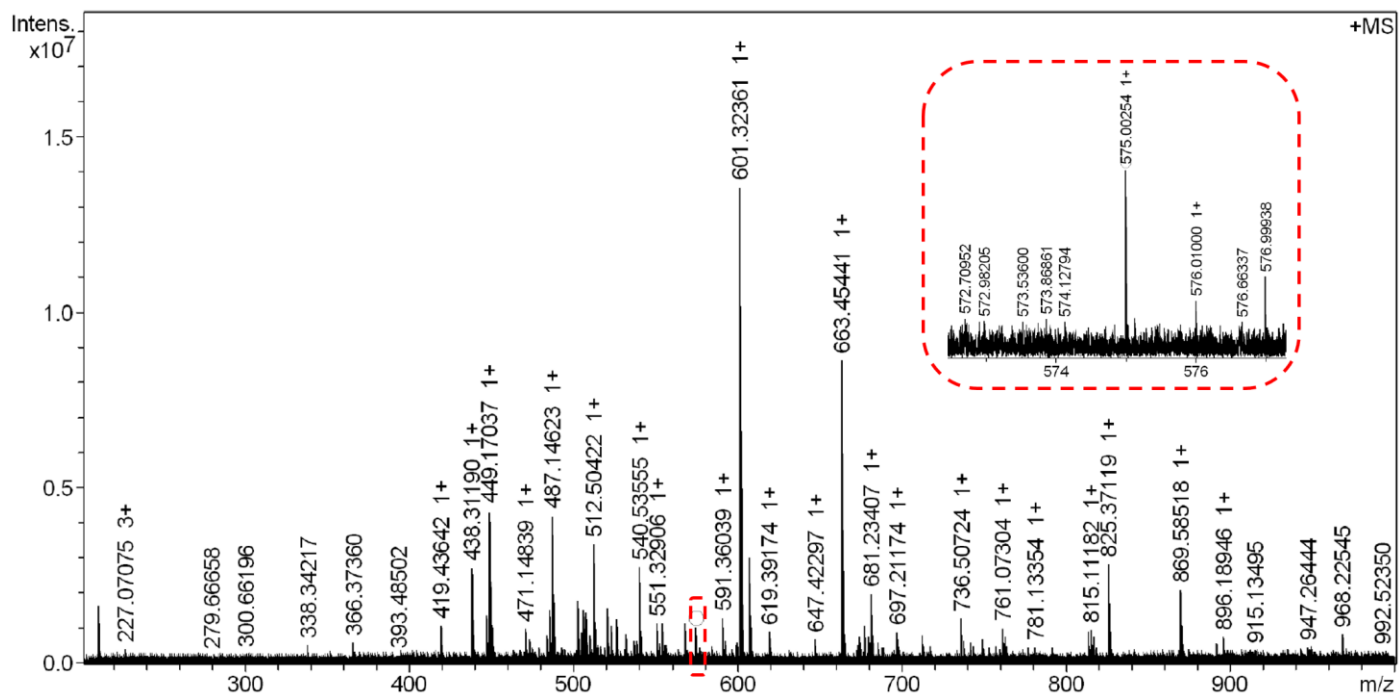

**Figure S13.** Positive MALDI-TOF HRMS spectrum of **7**. MALDI-TOF HRMS (m/z): [M + Na]<sup>+</sup> calcd. for C<sub>26</sub>H<sub>14</sub>Cl<sub>2</sub>N<sub>2</sub>NaO<sub>8</sub>, 575.0025; found: 575.0025.

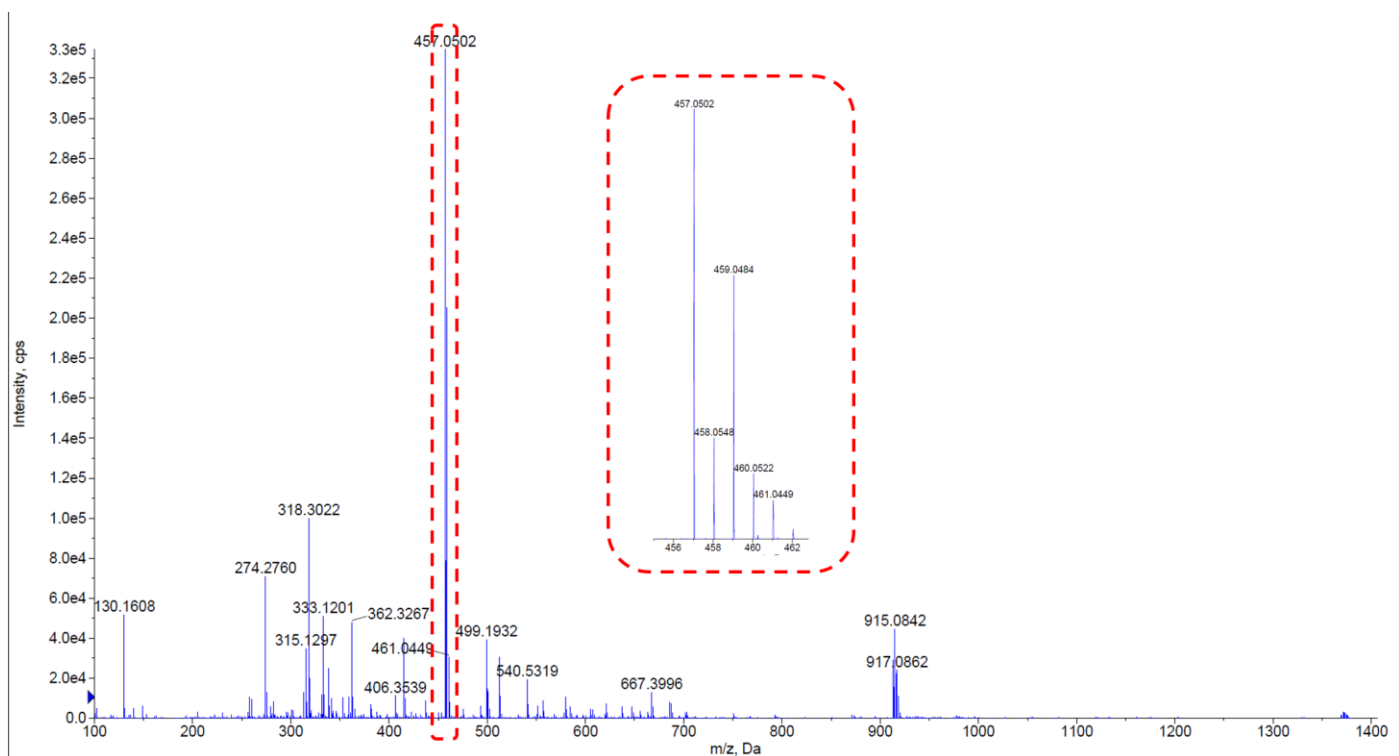

**Figure S14.** Positive ESI HRMS spectrum of **1**. HRMS-ESI (m/z): [M + H]<sup>+</sup> calcd. for C<sub>26</sub>H<sub>14</sub>Cl<sub>2</sub>N<sub>2</sub>O<sub>2</sub>: 457.0511; found: 457.0502.

Single crystal of **1**·C<sub>2</sub>H<sub>5</sub>OH was grown via slow evaporation of the solution containing **1** (5 mg) in 6 mL CH<sub>2</sub>Cl<sub>2</sub>/C<sub>2</sub>H<sub>5</sub>OH (2:1, v/v).

**Table S1.** Crystal data and structure refinement for [**1**·C<sub>2</sub>H<sub>5</sub>OH].

|                                             |                                                                               |
|---------------------------------------------|-------------------------------------------------------------------------------|
| Identification code                         | 2305337                                                                       |
| Empirical formula                           | C <sub>28</sub> H <sub>20</sub> Cl <sub>2</sub> N <sub>2</sub> O <sub>3</sub> |
| Formula weight                              | 503.36                                                                        |
| Temperature/K                               | 169.98(11)                                                                    |
| Crystal system                              | monoclinic                                                                    |
| Space group                                 | I2                                                                            |
| a/Å                                         | 23.523(2)                                                                     |
| b/Å                                         | 3.9699(5)                                                                     |
| c/Å                                         | 25.723(3)                                                                     |
| α/°                                         | 90                                                                            |
| β/°                                         | 113.829(12)                                                                   |
| γ/°                                         | 90                                                                            |
| Volume/Å <sup>3</sup>                       | 2197.3(5)                                                                     |
| Z                                           | 4                                                                             |
| ρ <sub>calc</sub> /g/cm <sup>3</sup>        | 1.522                                                                         |
| μ/mm <sup>-1</sup>                          | 2.962                                                                         |
| F(000)                                      | 1040.0                                                                        |
| Crystal size/mm <sup>3</sup>                | 0.16 × 0.05 × 0.02                                                            |
| Radiation                                   | CuK <sub>α</sub> (λ = 1.54184)                                                |
| 2θ range for data collection/°              | 4.302 to 124.986                                                              |
| Index ranges                                | -27 ≤ h ≤ 26, -4 ≤ k ≤ 4, -29 ≤ l ≤ 28                                        |
| Reflections collected                       | 8035                                                                          |
| Independent reflections                     | 3057 [R <sub>int</sub> = 0.0856, R <sub>sigma</sub> = 0.0774]                 |
| Data/restraints/parameters                  | 3057/43/319                                                                   |
| Goodness-of-fit on F <sup>2</sup>           | 1.002                                                                         |
| Final R indexes [I ≥ 2σ (I)]                | R <sub>1</sub> = 0.1025, wR <sub>2</sub> = 0.2495                             |
| Final R indexes [all data]                  | R <sub>1</sub> = 0.1227, wR <sub>2</sub> = 0.2706                             |
| Largest diff. peak/hole / e Å <sup>-3</sup> | 1.25/-0.40                                                                    |
| Flack parameter                             | 0.07(5)                                                                       |

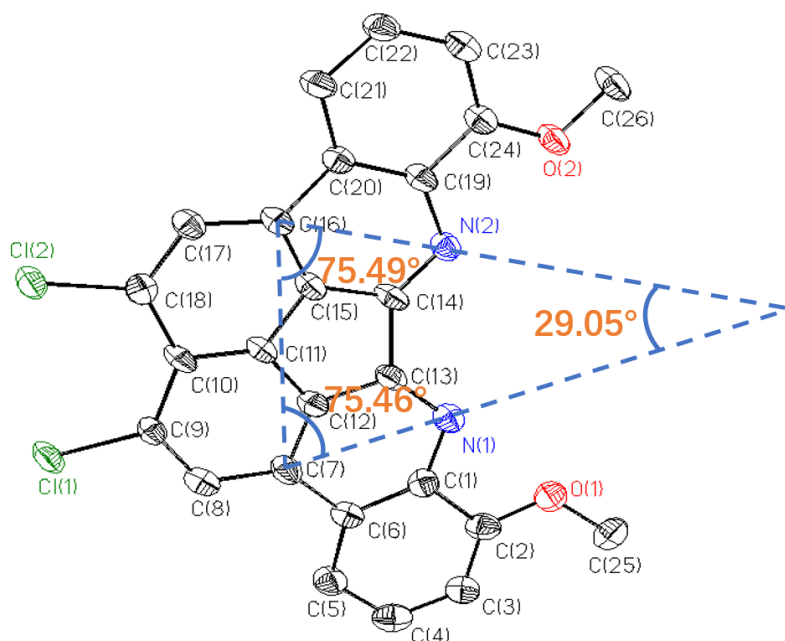

**Figure S15.** **1** in the single crystal of  $[1 \cdot C_2H_5OH]$  was shown in ellipsoid form. Displacement ellipsoids are scaled to the 50% probability level. Selected interatomic distance (Å): N(1)...N(2) 3.34(1). Selected interatomic angle:  $\angle N(2) \dots C(16) \dots C(7)$  75.46(1)°.  $\angle N(1) \dots C(7) \dots C(16)$  75.49(1)°.

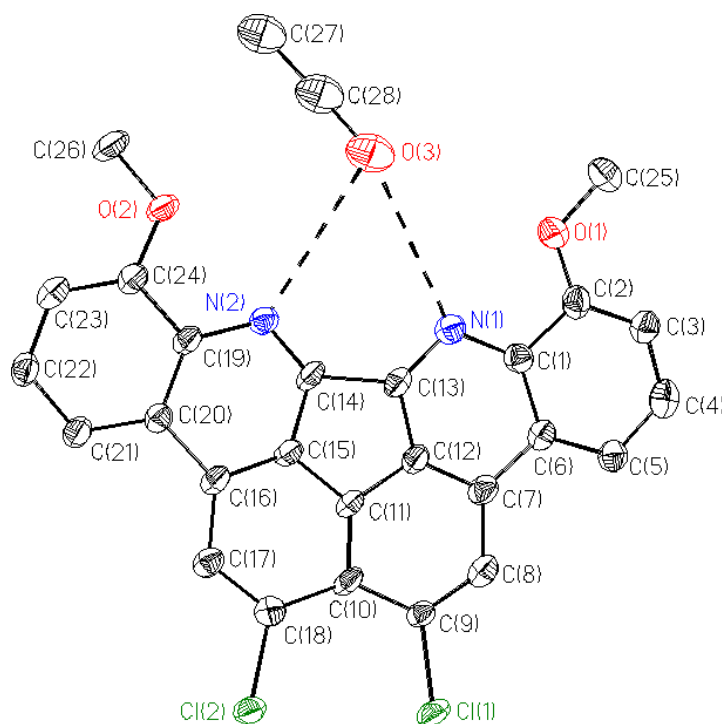

**Figure S16.** The interaction between ethanol and neighboring **1** in the single crystal structure of  $[1 \cdot C_2H_5OH]$  was shown in ellipsoid form showing. Displacement ellipsoids are scaled to the 50% probability level. Selected interatomic lengths (Å): N(1)...O(3) 3.42(7); N(2)...O(4) 3.46(7).

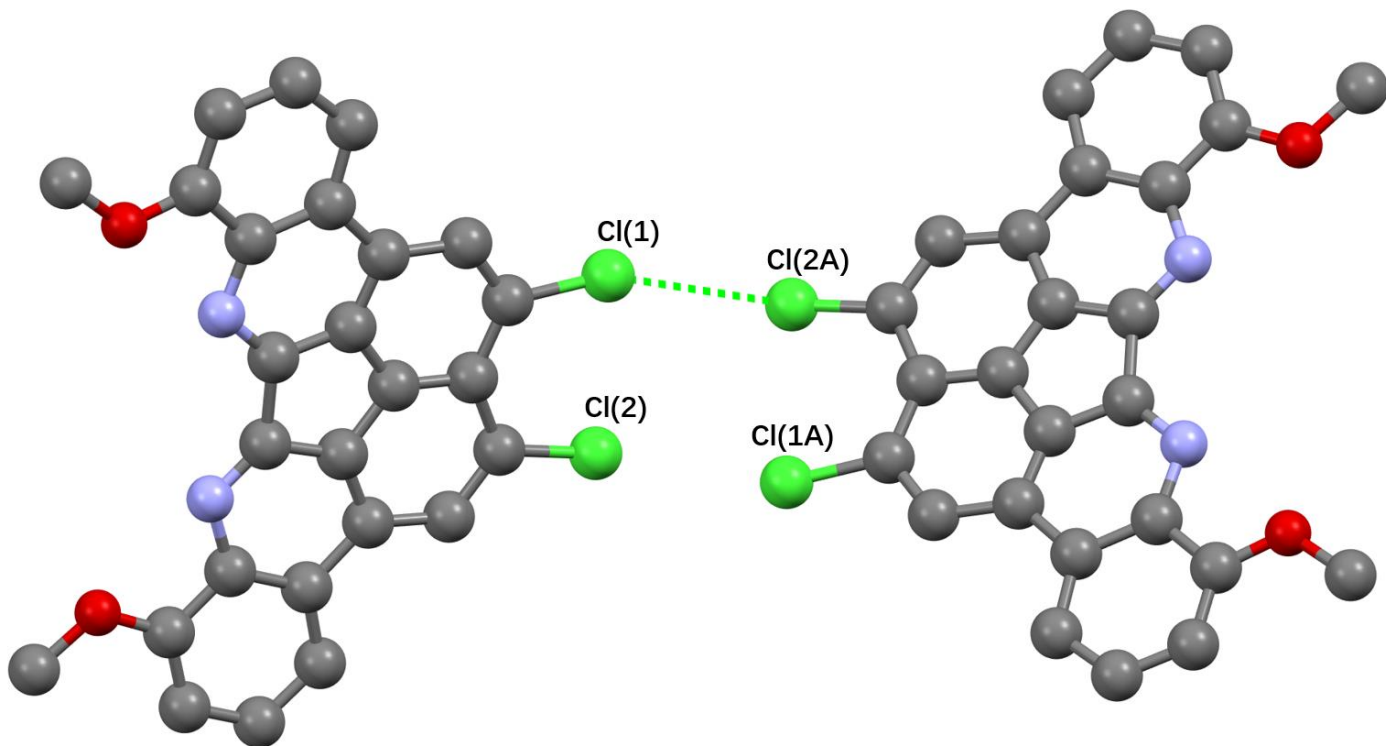

**Figure S17.** The Cl-Cl halogen bonding between neighboring **1** shown in the single crystal of  $[\mathbf{1} \cdot \text{C}_2\text{H}_5\text{OH}]$ . Selected interatomic distance (Å): Cl(1)...Cl(2A) 3.42(2).

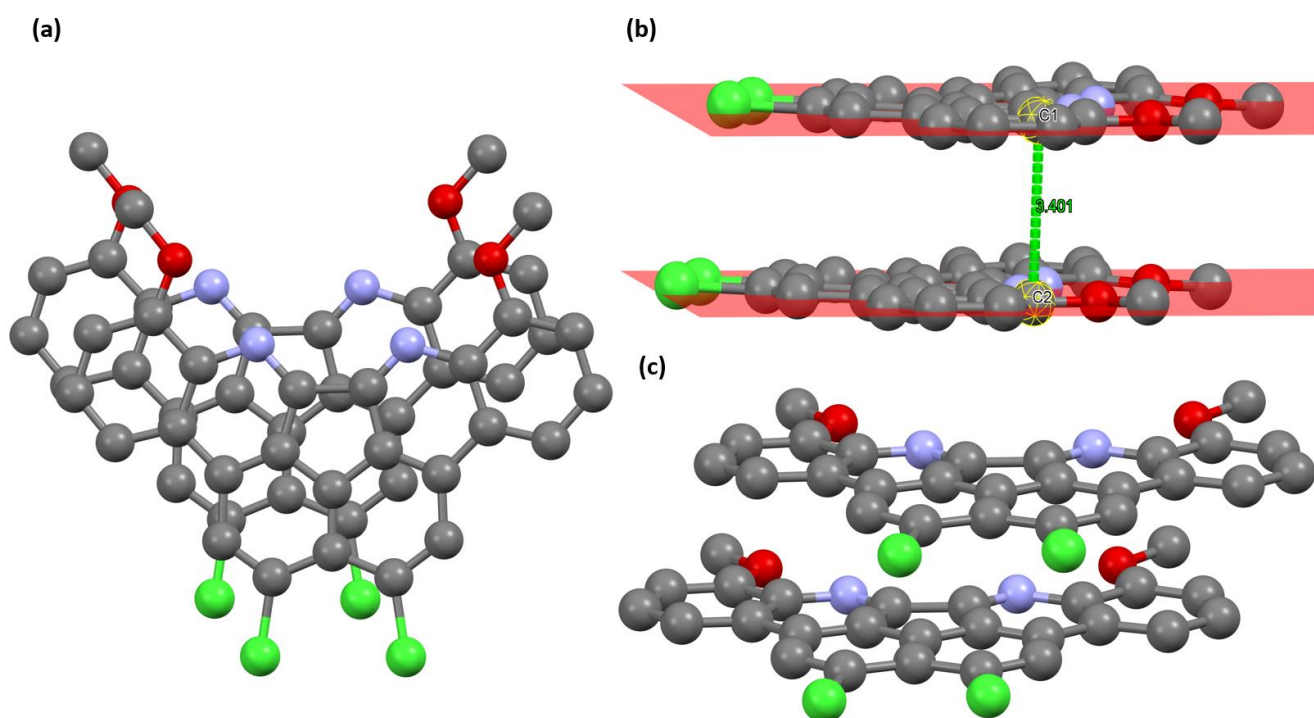

**Figure S18.** Top (a), side (b) and front (c) views of dimeric structure containing two neighbor **1** shown in the single crystal X-ray diffraction structure of  $[\mathbf{1} \cdot \text{C}_2\text{H}_5\text{OH}]$ . The  $\pi$ - $\pi$  donor acceptor interaction was suggested with selected interatomic distance (Å): C(1)...C(2A) 3.40(1).

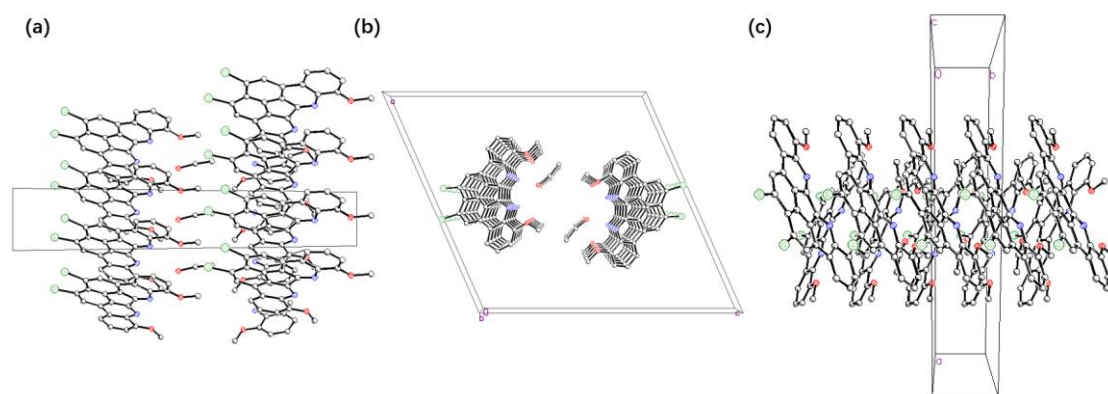

**Figure S19.** Packing diagram of the single crystal  $[1 \cdot \text{C}_2\text{H}_5\text{OH}]$  along with  $a$  (a),  $b$  (b), or  $c$  (c) cell axis.

### Uv-vis spectroscopic studies

#### (1) General procedure for the Uv-vis spectral studies

All Uv-vis spectra in this study were performed using a Shimadzu UV-2450 spectrophotometer at 298 K. In all titration experiments, 2000  $\mu$ L of **1** or **TB(phen)** solution ( $2.00 \times 10^{-5}$  M in CH<sub>2</sub>Cl<sub>2</sub>/CH<sub>3</sub>OH (4:1, v/v)) was added to the quartz cell. Each tested metal cation solution with a much higher concentration ( $1.00 \times 10^{-2}$  M or  $1.00 \times 10^{-3}$  M in CH<sub>2</sub>Cl<sub>2</sub>/CH<sub>3</sub>OH (4:1, v/v)) was dropwise added. Data was collected after each aliquot was added and mixed. The concentration of **1** or **TB(phen)** was subject to slight dilution; this was accounted for mathematically the Hyperquad Programme 2003.

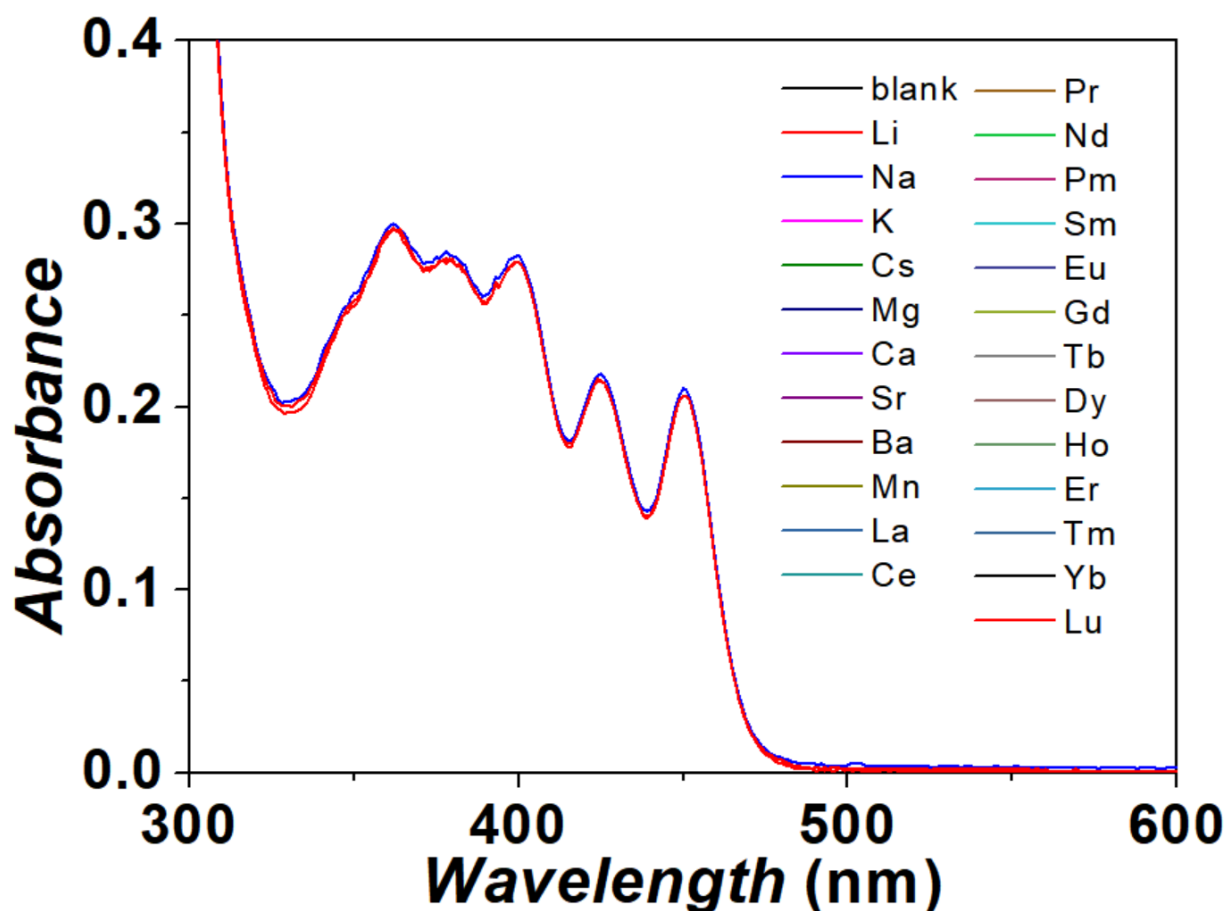

**Figure S20.** Uv-vis spectra of **1** ( $2.00 \times 10^{-5}$  M in CH<sub>2</sub>Cl<sub>2</sub>/CH<sub>3</sub>OH (4:1, v/v)) in the absence and presence of 100 molar equiv. of each tested metal cations, including alkali (*i.e.*, Li<sup>+</sup>, Na<sup>+</sup>, K<sup>+</sup> or Cs<sup>+</sup>), alkaline earth (*i.e.*, Mg<sup>2+</sup>, Ca<sup>2+</sup>, Sr<sup>2+</sup> or Ba<sup>2+</sup>), Mn<sup>2+</sup> or lanthanide (*i.e.*, La<sup>3+</sup>, Ce<sup>3+</sup>, Pr<sup>3+</sup>, Nd<sup>3+</sup>, Sm<sup>3+</sup>, Eu<sup>3+</sup>, Gd<sup>3+</sup>, Tb<sup>3+</sup>, Dy<sup>3+</sup>, Ho<sup>3+</sup>, Er<sup>3+</sup>, Tm<sup>3+</sup>, Yb<sup>3+</sup> or Lu<sup>3+</sup>) cation.

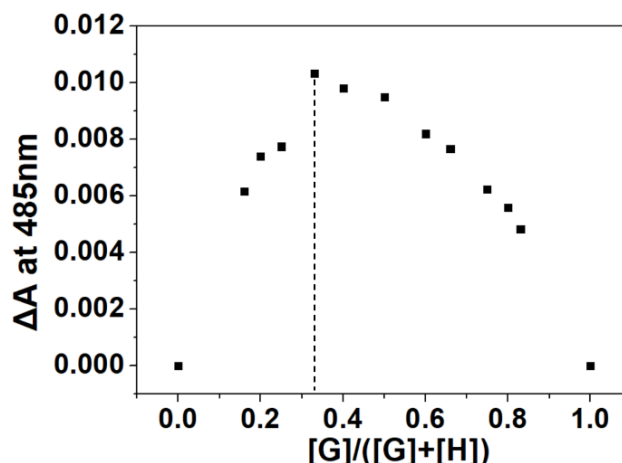

**Figure S21.** Job plot corresponding to the interactions between **1** and  $\text{Co}^{2+}$  in  $\text{CH}_2\text{Cl}_2/\text{CH}_3\text{OH}$  (4:1, v/v) at 298 K as monitored via Uv-vis spectroscopy. [Ligand] + [Metal] = 0.10 mM. Maximum value was seen at 0.33 in the case of  $\text{Co}^{2+}$ , this supports the 2:1 (ligand/metal) stoichiometry as suggested in the main text.

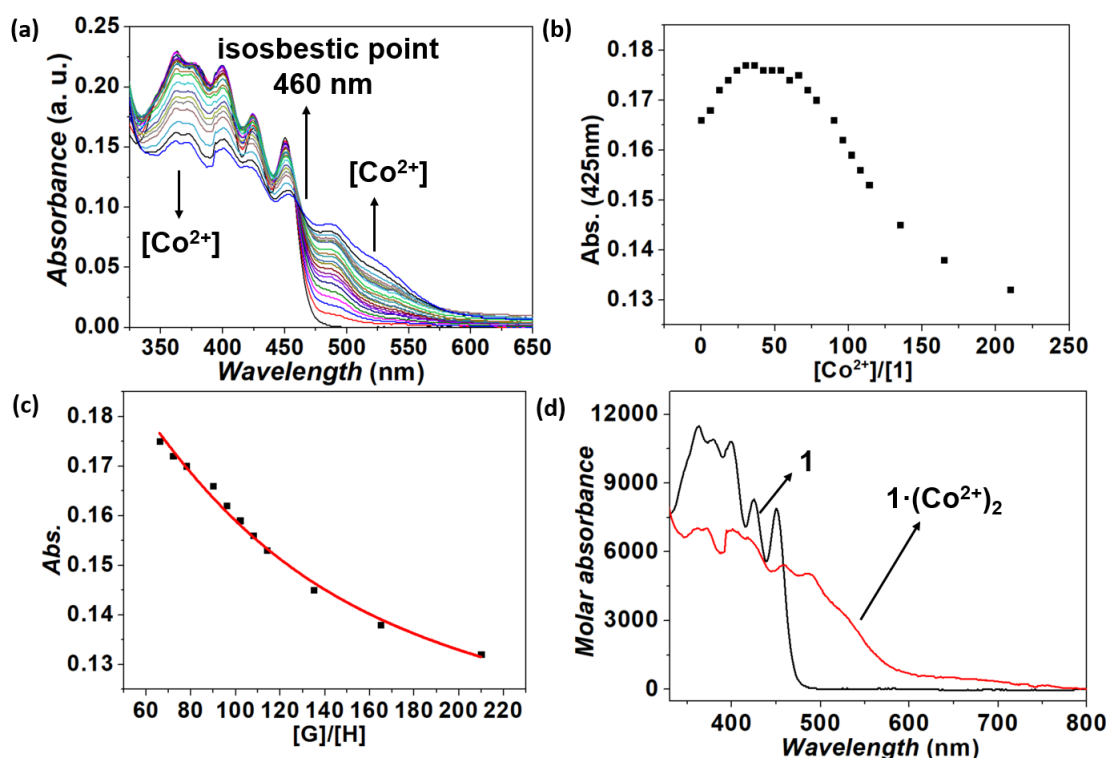

**Figure S22.** (a) Uv-vis spectra corresponding to **1** ( $2.00 \times 10^{-5}$  M in  $\text{CH}_2\text{Cl}_2/\text{CH}_3\text{OH}$  (4:1, v/v)) with increasing  $[\text{Co}^{2+}]$  (from 0 to 210.0 molar equiv.) at 298 K. (b) The absorbance changes at 425 nm (“■”). And (c) the results of the corresponding nonlinear curve fitting according calculated model (red line) using Hyperquad 2003. (d) The calculated molar absorbance of **1** and  $\mathbf{1} \cdot (\text{Co}^{2+})_2$  in  $\text{CH}_2\text{Cl}_2/\text{CH}_3\text{OH}$  (4:1, v/v). It is noted that the data with  $[\text{Co}^{2+}]/[\mathbf{1}]$  less than 66 were ignored in  $K_a$  calculation due to the complexity (including possible solvent competition and/or 1:1 complexation, *etc.*), which was weakened and could be ignored with  $[\text{Co}^{2+}]/[\mathbf{1}]$  larger than 66. The equilibria and related  $K_a$  calculation results as shown:  $2\text{M} + \text{L} \xrightleftharpoons{K_2} \text{M}_2 \cdot \text{L}$ ;  $\log K_2 = 5.5(3)$ .



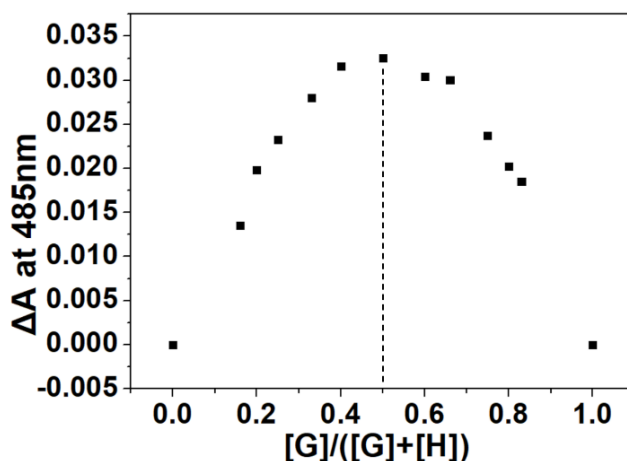

**Figure S23.** Job plot corresponding to the interactions between **1** and  $\text{Ni}^{2+}$  in  $\text{CH}_2\text{Cl}_2/\text{CH}_3\text{OH}$  (4:1, v/v) at 298 K as monitored via Uv-vis spectroscopy. [Ligand] + [Metal] = 0.10 mM. Maximum value was seen at 0.50, this supports 1:1 (ligand/metal) stoichiometry as suggested in the main text.

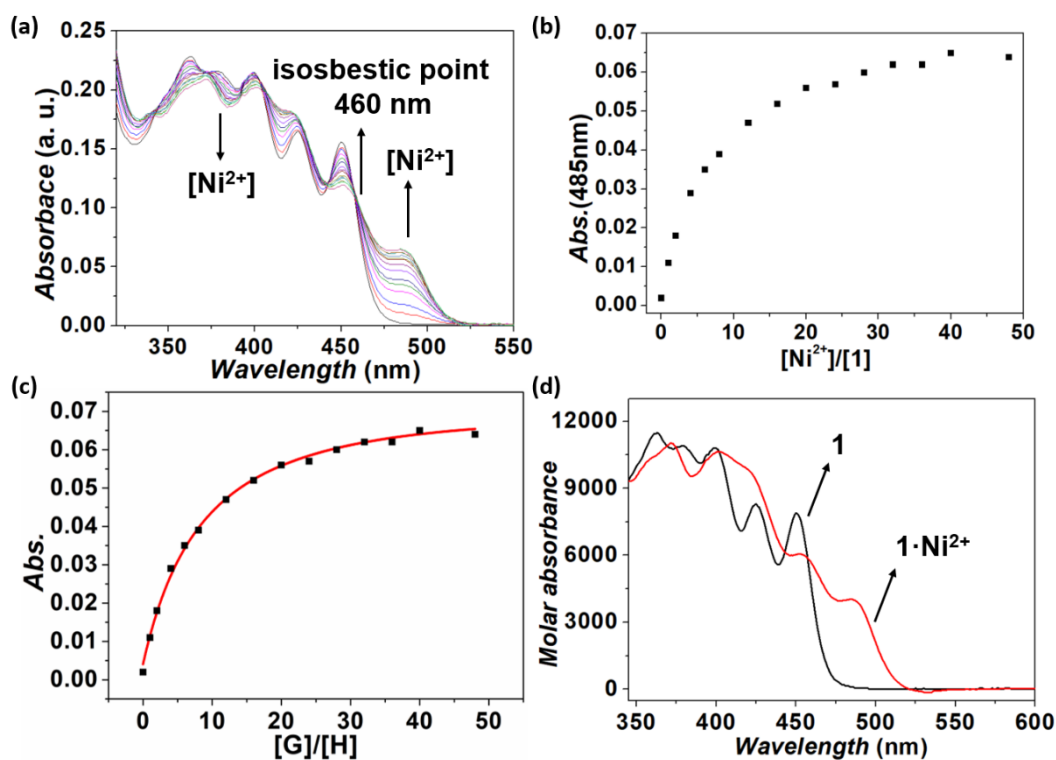

**Figure S24.** (a) Uv-vis spectra recorded corresponding to **1** ( $2.00 \times 10^{-5}$  M in  $\text{CH}_2\text{Cl}_2/\text{CH}_3\text{OH}$  (4:1, v/v)) with increasing  $[\text{Ni}^{2+}]$  (from 0 to 48.0 molar equiv.) at 298 K. (b) The absorbance changes at 485 nm (“■”). And (c) the results of the corresponding nonlinear curve fitting according calculated model (red line) using Hyperquad 2003. (d) The calculated molar absorbance of **1** and **1**· $\text{Ni}^{2+}$  in  $\text{CH}_2\text{Cl}_2/\text{CH}_3\text{OH}$  (4:1, v/v). The equilibriums and related  $K_a$  calculation results as shown:  $\text{M} + \text{L} \xrightleftharpoons{K_1} \text{M} \cdot \text{L}$ ,  $\log K_1 = 3.7(2)$ .

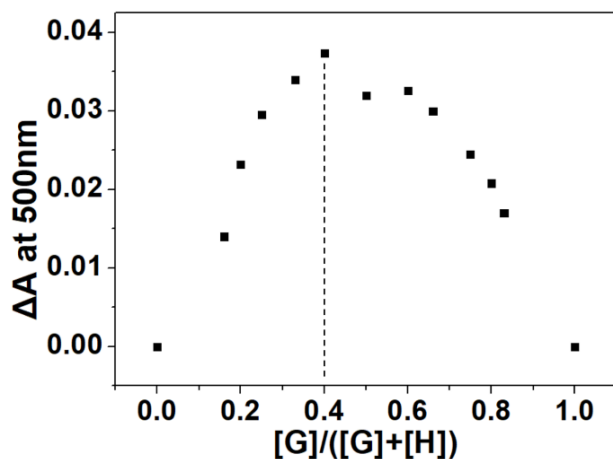

**Figure S25.** Job plot corresponding to the interactions between **1** and  $\text{Cu}^{2+}$  in  $\text{CH}_2\text{Cl}_2/\text{CH}_3\text{OH}$  (4:1, v/v) at 298 K as monitored via Uv-vis spectroscopy. [Ligand] + [Metal] = 0.10 mM. Maximum value was seen at 0.4, this supports 2:1 and 1:1 (ligand/metal) stoichiometry as suggested in the main text.

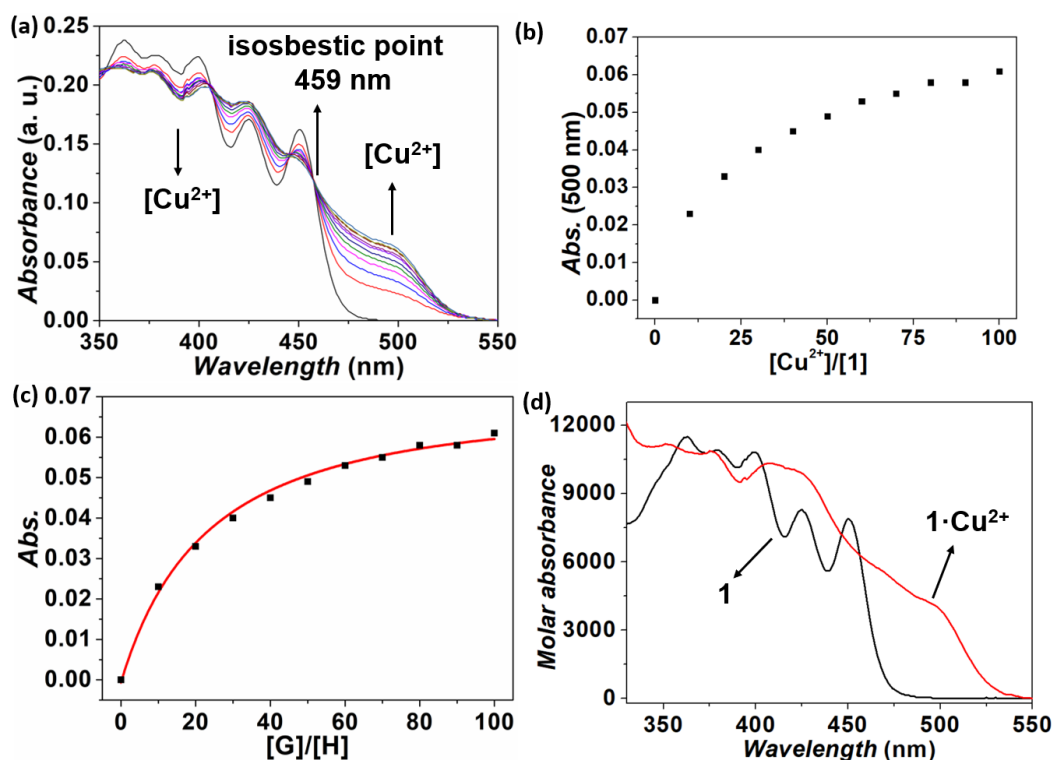

**Figure S26.** (a) Uv-vis spectra recorded corresponding to **1** ( $2.00 \times 10^{-5}$  M in  $\text{CH}_2\text{Cl}_2/\text{CH}_3\text{OH}$  (4:1, v/v)) with increasing  $[\text{Cu}^{2+}]$  (from 0 to 100.0 molar equiv.) at 298 K. (b) The absorbance changes at 500 nm (“■”). And (c) the results of the corresponding nonlinear curve fitting according calculated model (red line) using Hyperquad 2003. (d) The calculated molar absorbance of **1** and **1**· $\text{Cu}^{2+}$  in  $\text{CH}_2\text{Cl}_2/\text{CH}_3\text{OH}$  (4:1, v/v). The equilibriums and related  $K_a$  calculation results as shown:  $\text{M} + \text{L} \xrightleftharpoons{K_1} \text{M} \cdot \text{L}$ ;  $\log K_1 = 3.3(2)$ .

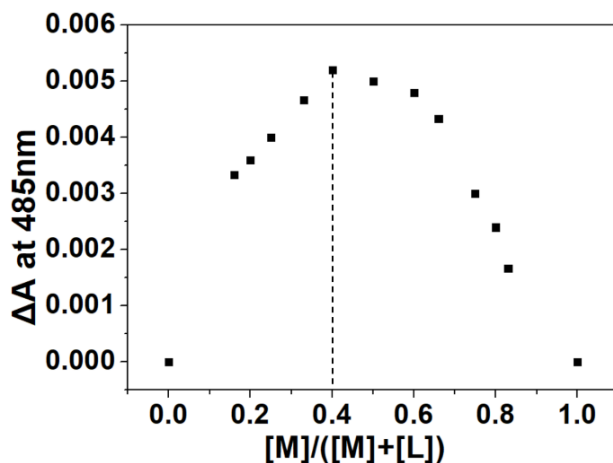

**Figure S27.** Job plot corresponding to the interactions between **1** and  $\text{Zn}^{2+}$  in  $\text{CH}_2\text{Cl}_2/\text{CH}_3\text{OH}$  (4:1, v/v) at 298 K as monitored via Uv-vis spectroscopy. [Ligand] + [Metal] = 0.10 mM. Maximum value was seen at 0.4, this supports mixing 2:1 and 1:1 (ligand/metal) stoichiometry as suggested in the main text.

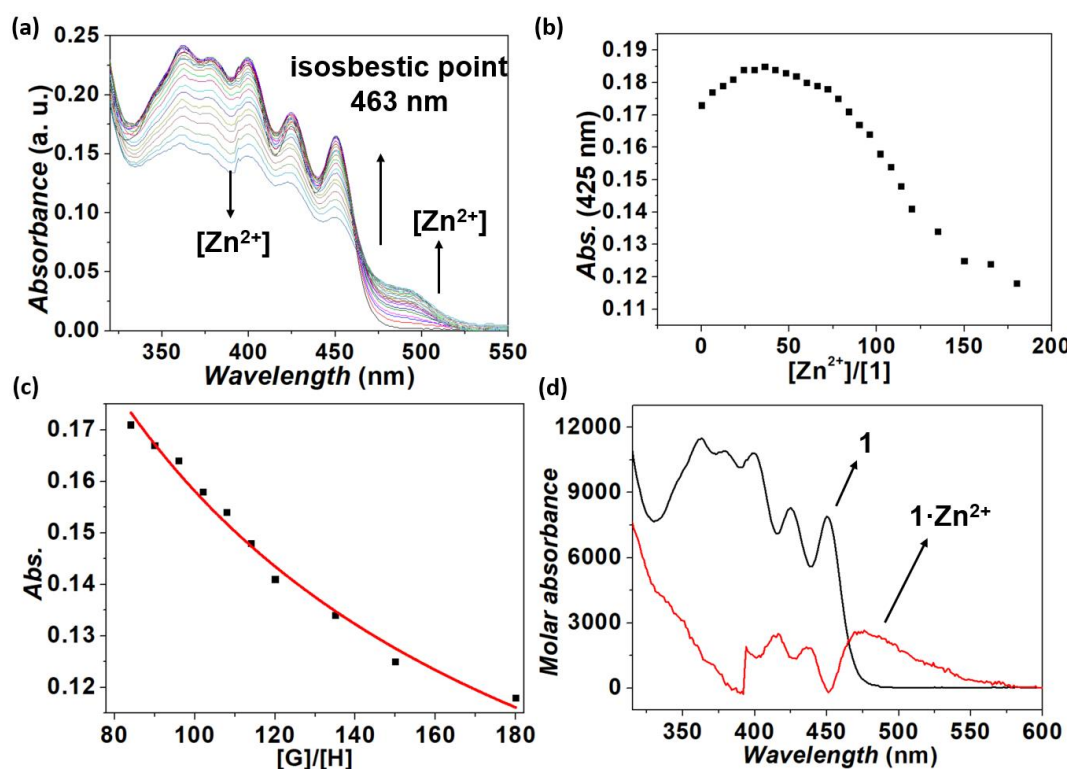

**Figure S28.** (a) Uv-vis spectra recorded corresponding to **1** ( $2.00 \times 10^{-5}$  M in  $\text{CH}_2\text{Cl}_2/\text{CH}_3\text{OH}$  (4:1, v/v)) with increasing  $[\text{Zn}^{2+}]$  (from 0 to 180.0 molar equiv.) at 298 K. (b) The absorbance changes at 425 nm (“■”). And (c) the results of the corresponding nonlinear curve fitting according calculated model (red line) using Hyperquad 2003. (d) The calculated molar absorbance of **1** and  $\mathbf{1 \cdot Zn^{2+}}$  in  $\text{CH}_2\text{Cl}_2/\text{CH}_3\text{OH}$  (4:1, v/v). It is noted that the data with  $[\text{Zn}^{2+}]/[\mathbf{1}]$  less than 84 were ignored in  $K_a$  calculation due to the complexity (including possible solvent competition and/or 2:1 complexation, etc.), which was weakened and could be ignored with  $[\text{Zn}^{2+}]/[\mathbf{1}]$  larger than 84. The equilibria and related  $K_a$  calculation results as shown:  $\text{M} + \text{L} \xrightleftharpoons{K_1} \text{M} \cdot \text{L}$ ;  $\log K_1 = 3.2(2)$ .

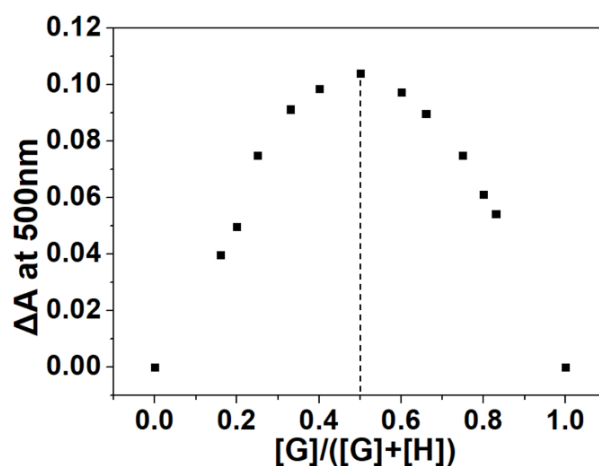

**Figure S29.** Job plot corresponding to the interactions between **1** and  $\text{Zr}^{4+}$  in  $\text{CH}_2\text{Cl}_2/\text{CH}_3\text{OH}$  (4:1, v/v) at 298 K as monitored via Uv-vis spectroscopy. [Ligand] + [Metal] = 0.10 mM. Maximum value was seen at 0.5, this supports 1:1 (ligand/metal) stoichiometry as suggested in the main text.

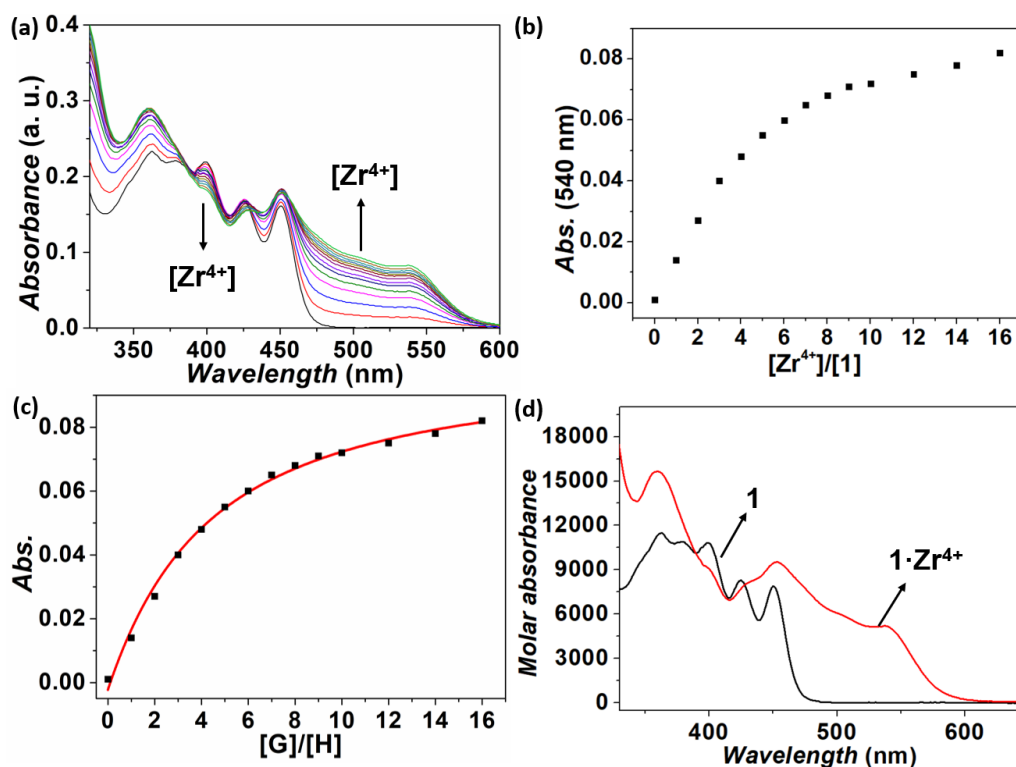

**Figure S30.** (a) Uv-vis spectra recorded corresponding to **1** ( $2.00 \times 10^{-5}$  M in  $\text{CH}_2\text{Cl}_2/\text{CH}_3\text{OH}$  (4:1, v/v)) with increasing  $[\text{Zr}^{4+}]$  (from 0 to 16.0 molar equiv.) at 298 K. (b) The absorbance changes at 540 nm (“■”). And (c) the results of the corresponding nonlinear curve fitting according calculated model (red line) using Hyperquad 2003. (d) The calculated molar absorbance of **1** and  $1 \cdot \text{Zr}^{4+}$  in  $\text{CH}_2\text{Cl}_2/\text{CH}_3\text{OH}$  (4:1, v/v). The equilibriums and related  $K_a$  calculation results as shown:  $\text{M} + \text{L} \xrightleftharpoons{K_1} \text{M} \cdot \text{L}$ ;  $\log K_I = 4.1(2)$ .

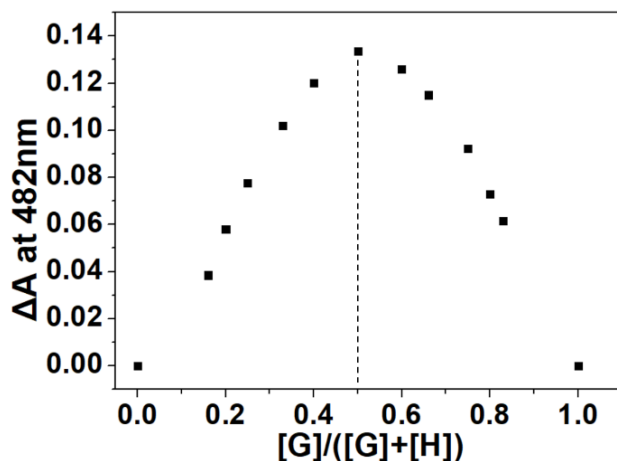

**Figure S31.** Job plot corresponding to the interactions between **1** and  $\text{Ag}^+$  in  $\text{CH}_2\text{Cl}_2/\text{CH}_3\text{OH}$  (4:1, v/v) at 298 K as monitored via Uv-vis spectroscopy. [Ligand] + [Metal] = 0.10 mM. Maximum value was seen at 0.5, this supports 1:1 (ligand/metal) stoichiometry as suggested in the main text.

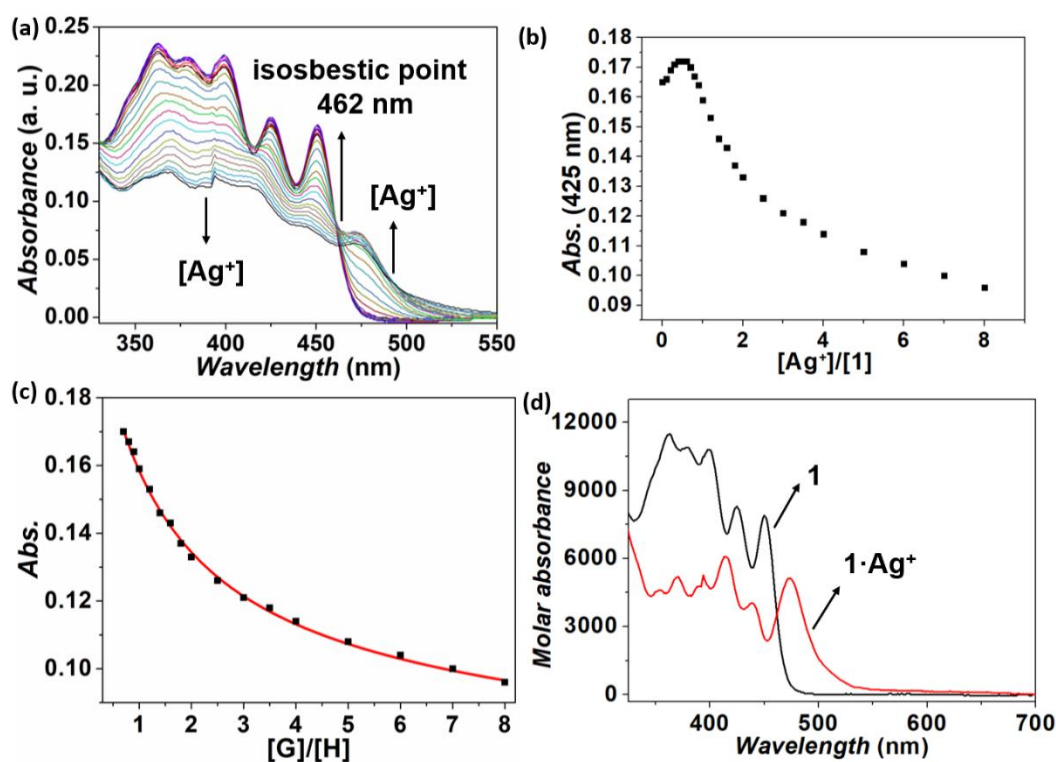

**Figure S32.** (a) Uv-vis spectra recorded corresponding to **1** ( $2.00 \times 10^{-5}$  M in  $\text{CH}_2\text{Cl}_2/\text{CH}_3\text{OH}$  (4:1, v/v)) with increasing  $[\text{Ag}^+]$  (from 0 to 8.0 molar equiv.) at 298 K. (b) The absorbance changes at 425 nm (“■”). And (c) the results of the corresponding nonlinear curve fitting according calculated model (red line) using Hyperquad 2003. (d) The calculated molar absorbance of **1** and  $\mathbf{1} \cdot \text{Ag}^+$  in  $\text{CH}_2\text{Cl}_2/\text{CH}_3\text{OH}$  (4:1, v/v). The equilibriums and related  $K_a$  calculation results as shown:  $\text{M} + \text{L} \xrightleftharpoons{K_1} \text{M} \cdot \text{L}$ ;  $\log K_I = 3.6(2)$ .

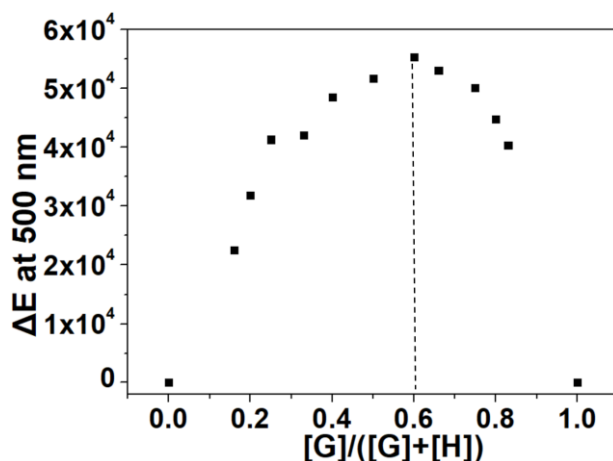

**Figure S33.** Job plot corresponding to the interactions between **1** and  $\text{Cd}^{2+}$  in  $\text{CH}_2\text{Cl}_2/\text{CH}_3\text{OH}$  (4:1, v/v) at 298 K as monitored via Uv-vis spectroscopy. [Ligand] + [Metal] = 0.10 mM. Maximum value was seen at 0.6, this supports 2:1 (ligand/metal) stoichiometry as suggested in the main text.

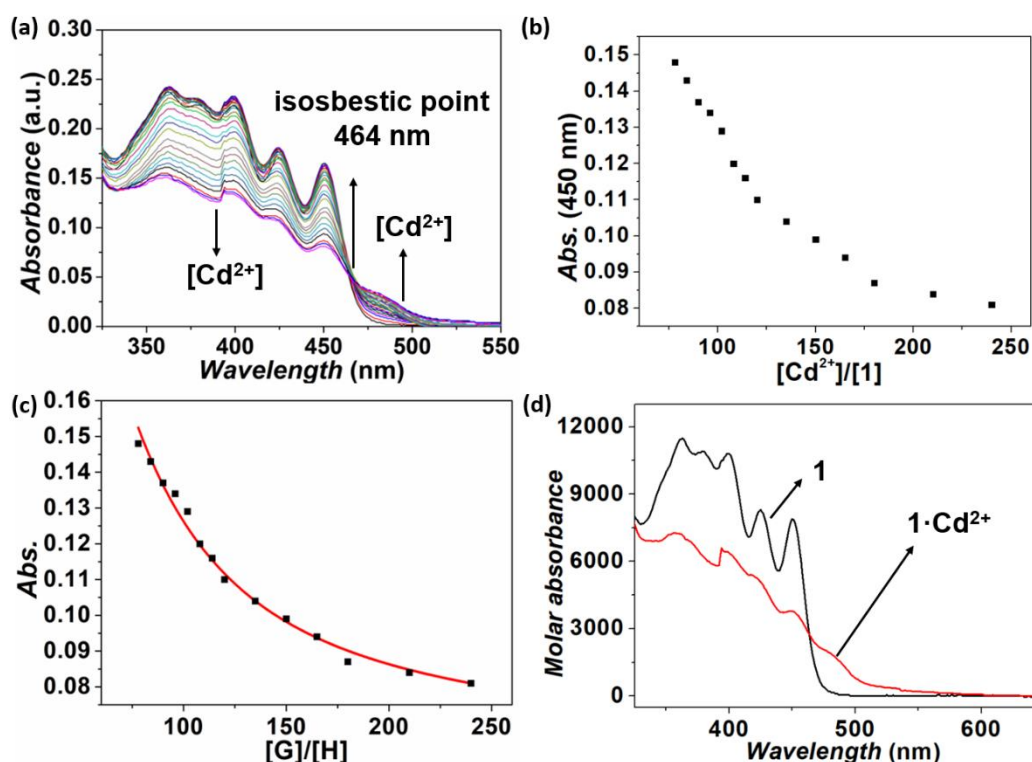

**Figure S34.** (a) Uv-vis spectra recorded corresponding to **1** ( $2.00 \times 10^{-5}$  M) in  $\text{CH}_2\text{Cl}_2/\text{CH}_3\text{OH}$  (4:1, v/v) as a function of increasing  $[\text{Cd}^{2+}]$  (from 0 to 240.0 molar equiv.) at 298 K. (b) The absorbance changes at 450 nm (“■”). (c) The results of the corresponding nonlinear curve fitting according calculated model (red line) using Hyperquad 2003. (d) The calculated molar absorbance of **1** and  $\mathbf{1 \cdot Cd^{2+}}$  in  $\text{CH}_2\text{Cl}_2/\text{CH}_3\text{OH}$  (4:1, v/v). It is noted that the data with  $[\text{Cd}^{2+}]/[\mathbf{1}]$  less than 84 were ignored in  $K_a$  calculation due to the complexity (including possible solvent competition and/or 2:1 complexation, etc.), which was weakened. The equilibria and related  $K_a$  calculation results as shown:  $2\text{M} + \text{L} \xrightleftharpoons{K_2} \text{M}_2\text{L}$ ;  $\log K_2 = 6.1(3)$ .

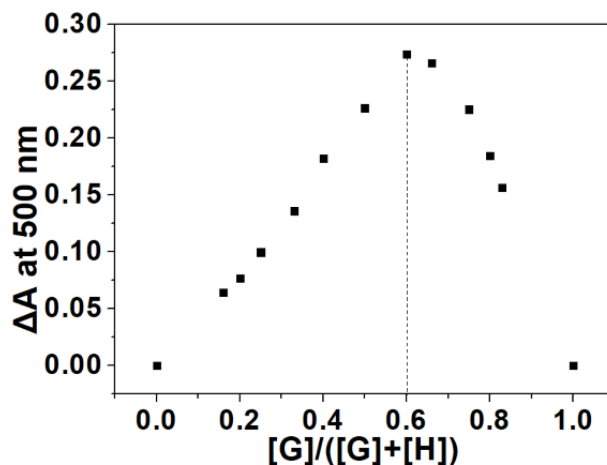

**Figure S35.** Job plot corresponding to the interactions between **TB(phen)** and  $\text{Co}^{2+}$  in  $\text{CH}_2\text{Cl}_2/\text{CH}_3\text{OH}$  (4:1, v/v) at 298 K as monitored via Uv-vis spectroscopy. [Ligand] + [Metal] = 0.40 mM. Maximum value was seen at 0.6 in the case of  $\text{Co}^{2+}$ , this supports mixing 1:1 and 1:2 (ligand/metal) stoichiometry as suggested in the main text.

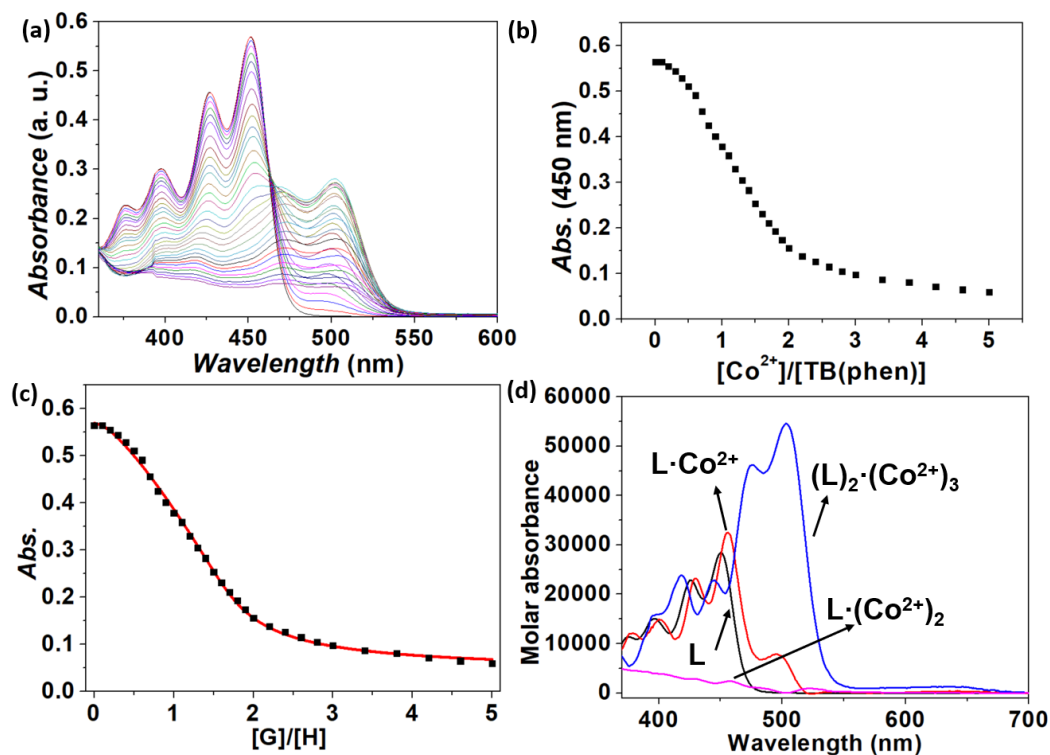

**Figure S36.** (a) Uv-vis spectra recorded corresponding to **TB(phen)** ( $\text{L}$ :  $2.00 \times 10^{-5}$  M in  $\text{CH}_2\text{Cl}_2/\text{CH}_3\text{OH}$  (4:1, v/v)) with increasing  $[\text{Co}^{2+}]$  (from 0 to 5.0 molar equiv.) at 298 K. (b) The absorbance changes at 450 nm (“■”). And (c) the results of the corresponding nonlinear curve fitting according calculated model (red line) using Hyperquad 2003. (d) The calculated molar absorbance of **TB(phen)** and its complexes. The equilibriums and related  $K_a$  calculation results as shown:  $2\text{M} + \text{L} \xrightleftharpoons{K_2} \text{M}_2\text{L}$ ;  $\log K_2 = 12.3(3)$ ;  $3\text{M} + 2\text{L} \xrightleftharpoons{K_3} \text{M}_3\text{L}_2$ ;  $\log K_3 = 23.9(2)$ ;  $\text{M} + \text{L} \xrightleftharpoons{K_1} \text{ML}$ ;  $\log K_1 = 6.3(6)$ .



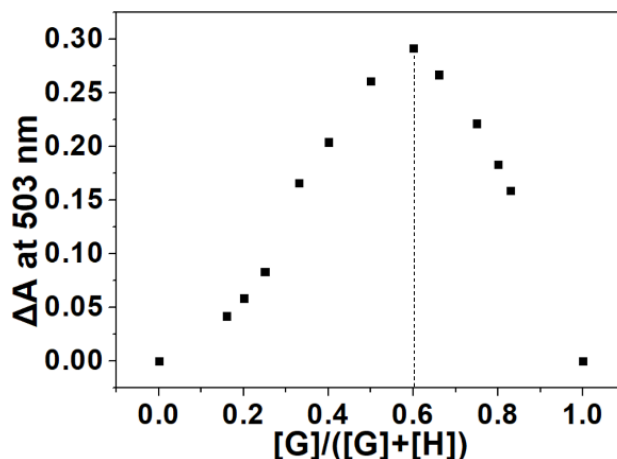

**Figure S37.** Job plot corresponding to the interactions between **TB(phen)** and  $\text{Ni}^{2+}$  in  $\text{CH}_2\text{Cl}_2/\text{CH}_3\text{OH}$  (4:1, v/v) at 298 K as monitored via Uv-vis spectroscopy. [Ligand] + [Metal] = 0.40 mM. Maximum value was seen at 0.6 in the case of  $\text{Ni}^{2+}$ , this supports mixing 1:1 and 1:2 (ligand/metal) stoichiometry as suggested in the main text.

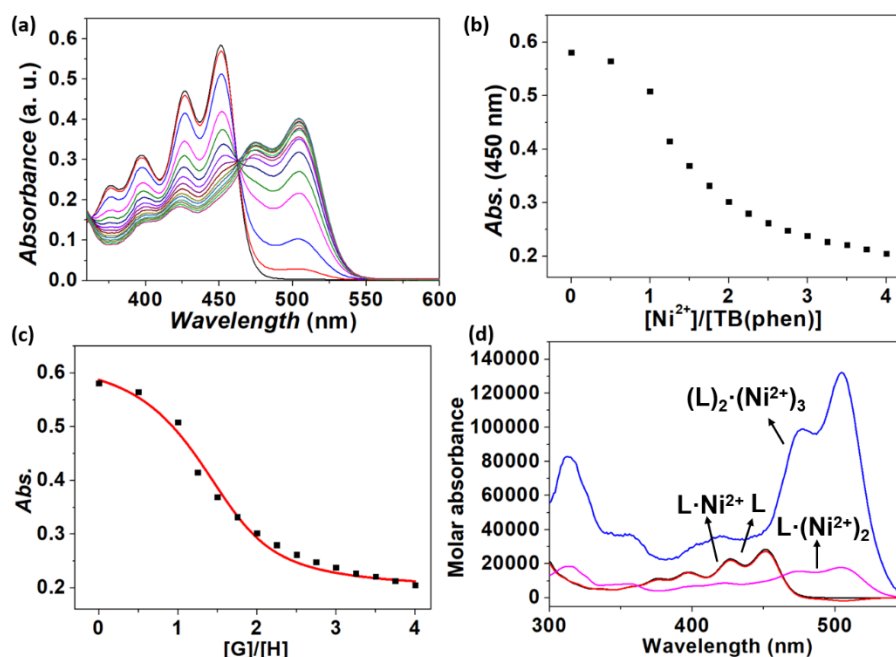

**Figure S38.** (a) Uv-vis spectra recorded corresponding to **TB(phen)** ( $\text{L}$ :  $2.00 \times 10^{-5}$  M in  $\text{CH}_2\text{Cl}_2/\text{CH}_3\text{OH}$  (4:1, v/v)) with increasing  $[\text{Ni}^{2+}]$  (from 0 to 6.0 molar equiv.) at 298 K. (b) The absorbance changes at 450 nm (“■”). And (c) the results of the corresponding nonlinear curve fitting according calculated model (red line) using Hyperquad 2003. (d) The calculated molar absorbance of **TB(phen)** and its complexes. The equilibriums and related  $K_a$  calculation results as shown:  $2\text{M} + \text{L} \xrightleftharpoons{K_2} \text{M}_2\text{L}$ ;  $\log K_2 = 12.5(3)$ ;  $3\text{M} + 2\text{L} \xrightleftharpoons{K_3} \text{M}_3\text{L}_2$ ;  $\log K_3 = 23.5(2)$ ;  $\text{M} + \text{L} \xrightleftharpoons{K_1} \text{ML}$ ;  $\log K_1 = 6.8(3)$ .



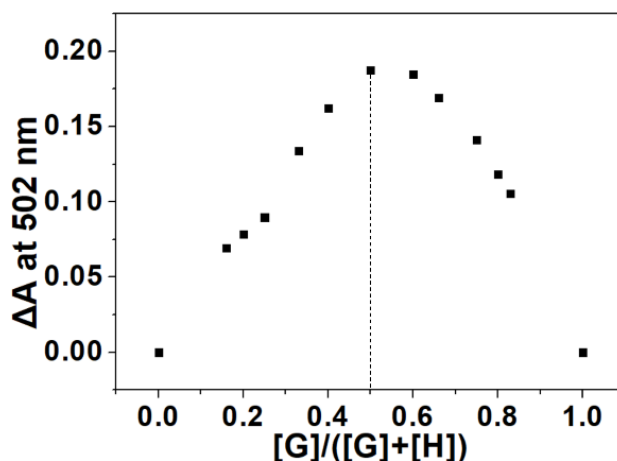

**Figure S39.** Job plot corresponding to the interactions between **TB(phen)** and  $\text{Cd}^{2+}$  in  $\text{CH}_2\text{Cl}_2/\text{CH}_3\text{OH}$  (4:1,  $v/v$ ) at 298 K as monitored via Uv-vis spectroscopy. [Ligand] + [Metal] = 0.40 mM. Maximum value was seen at 0.5 in the case of  $\text{Cd}^{2+}$ , this supports the 1:1 (ligand/metal) stoichiometry as suggested in the main text.

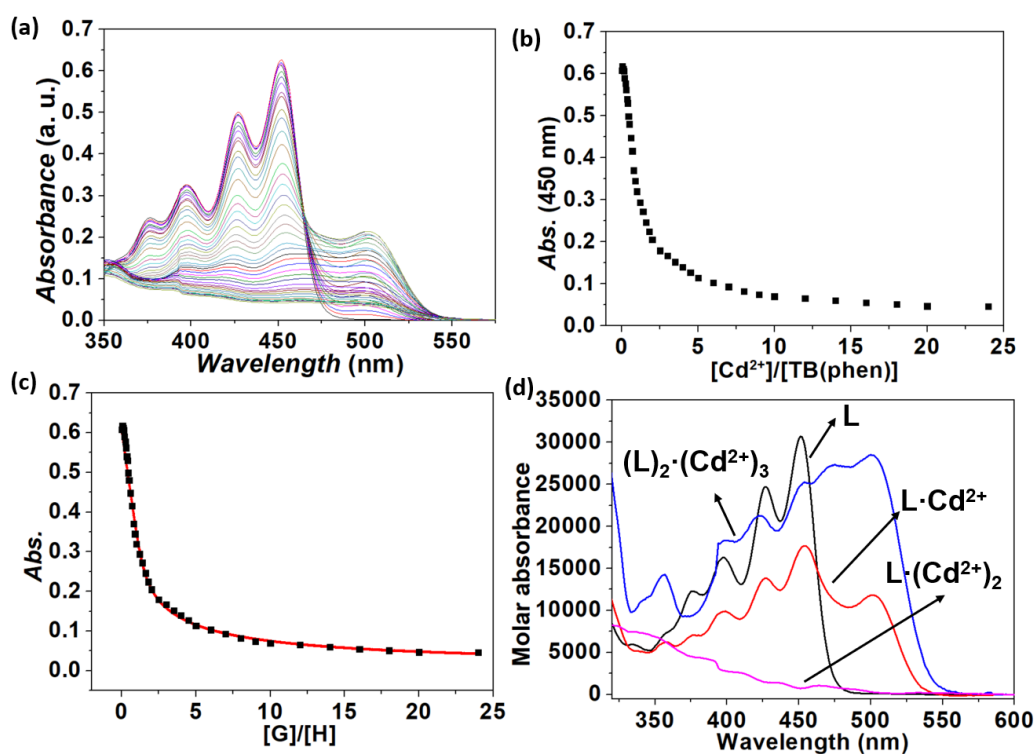

**Figure S40.** (a) Uv-vis spectra recorded corresponding to **TB(phen)** ( $\text{L}$ :  $2.00 \times 10^{-5}$  M in  $\text{CH}_2\text{Cl}_2/\text{CH}_3\text{OH}$  (4:1,  $v/v$ )) with increasing  $[\text{Cd}^{2+}]$  (from 0 to 24.0 molar equiv.) at 298 K. (b) The absorbance changes at 450 nm (“■”). And (c) the results of the corresponding nonlinear curve fitting according calculated model (red line) using Hyperquad 2003. (d) The calculated molar absorbance of **TB(phen)** and its complexes. The equilibriums and related  $K_a$  calculation results as shown:  $2\text{M} + \text{L} \xrightleftharpoons{K_2} \text{M}_2\text{L}$ ;  $\log K_2 = 12.3(5)$ ;  $3\text{M} + 2\text{L} \xrightleftharpoons{K_3} \text{M}_3\text{L}_2$ ;  $\log K_3 = 24.9(4)$ ;  $\text{M} + \text{L} \xrightleftharpoons{K_1} \text{ML}$ ;  $\log K_1 = 7.3(2)$ .

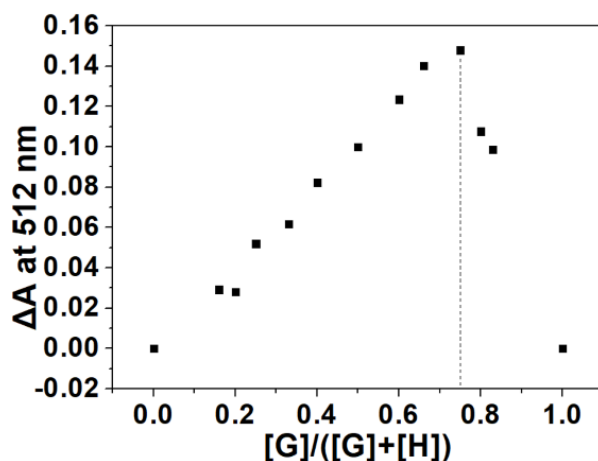

**Figure S41.** Job plot corresponding to the interactions between **TB(phen)** and  $\text{Zn}^{2+}$  in  $\text{CH}_2\text{Cl}_2/\text{CH}_3\text{OH}$  (4:1,  $v/v$ ) at 298 K as monitored via Uv-vis spectroscopy. [Ligand] + [Metal] = 0.40 mM. Maximum value was seen at 0.75 in the case of  $\text{Zn}^{2+}$ , this supports the 1:3 (ligand/metal) stoichiometry as suggested in the main text.

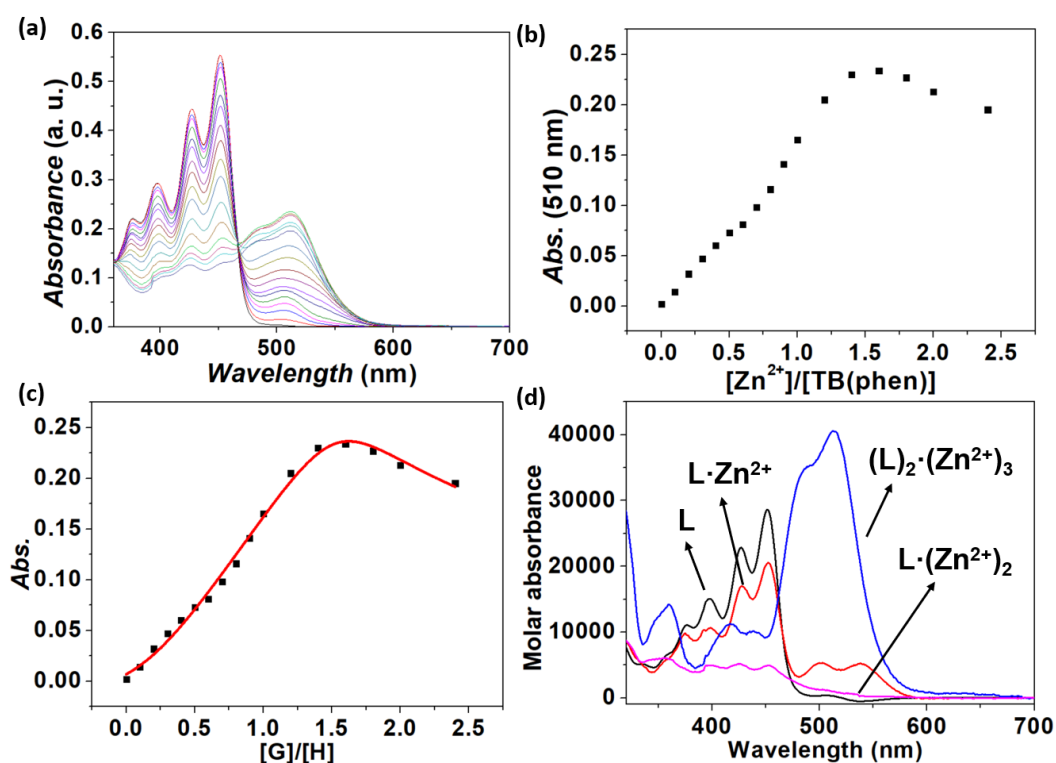

**Figure S42.** (a) Uv-vis spectra recorded corresponding to **TB(phen)** ( $\text{L}$ :  $2.00 \times 10^{-5}$  M in  $\text{CH}_2\text{Cl}_2/\text{CH}_3\text{OH}$  (4:1,  $v/v$ )) with increasing  $[\text{Zn}^{2+}]$  (from 0 to 4.0 molar equiv.) at 298 K. (b) The absorbance changes at 450 nm (“■”). And (c) the results of the corresponding nonlinear curve fitting according calculated model (red line) using Hyperquad 2003. (d) The calculated molar absorbance of **TB(phen)** and its complexes. The equilibriums and related  $K_a$  calculation results as shown:  $2\text{M} + \text{L} \xrightleftharpoons{K_2} \text{M}_2\text{L}$ ;  $\log K_2 = 11.9(2)$ ;  $3\text{M} + 2\text{L} \xrightleftharpoons{K_3} \text{M}_3\text{L}_2$ ;  $\log K_3 = 23.6(4)$ ;  $\text{M} + \text{L} \xrightleftharpoons{K_1} \text{ML}$ ;  $\log K_1 = 6.3(5)$ .

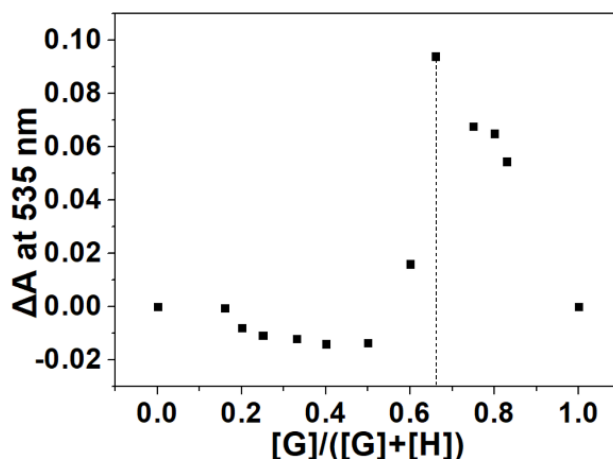

**Figure S43.** Job plot corresponding to the interactions between **TB(phen)** and  $\text{Zr}^{4+}$  in  $\text{CH}_2\text{Cl}_2/\text{CH}_3\text{OH}$  (4:1, v/v) at 298 K as monitored via Uv-vis spectroscopy. [Ligand] + [Metal] = 0.40 mM. Maximum value was seen at 0.66 in the case of  $\text{Zr}^{4+}$ , this supports the 1:2 (ligand/metal) stoichiometry as suggested in the main text.

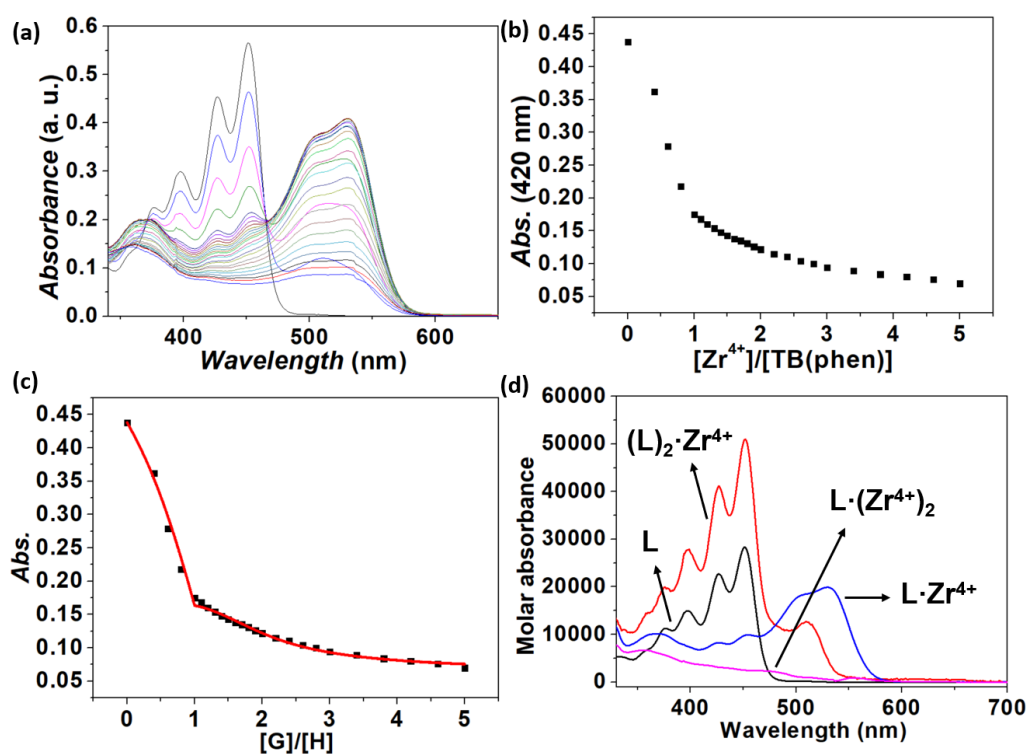

**Figure S44.** (a) Uv-vis spectra recorded corresponding to **TB(phen)** ( $\text{L}$ :  $2.00 \times 10^{-5}$  M in  $\text{CH}_2\text{Cl}_2/\text{CH}_3\text{OH}$  (4:1, v/v)) with increasing  $[\text{Zr}^{4+}]$  (from 0 to 5.0 molar equiv.) at 298 K. (b) The absorbance changes at 420 nm (“■”). And (c) the results of the corresponding nonlinear curve fitting according calculated model (red line) using Hyperquad 2003. (d) The calculated molar absorbance of **TB(phen)** and its complexes. The equilibria and related  $K_a$  calculation results as shown:  $2\text{M} + \text{L} \xrightleftharpoons{K_2} \text{M}_2\text{L}$ ;  $\log K_2 = 16.9(8)$ ;  $\text{M} + \text{L} \xrightleftharpoons{K_1} \text{ML}$ ;  $\log K_1 = 11.7(5)$ ;  $\text{M} + 2\text{L} \xrightleftharpoons{K_2'} \text{ML}_2$ ;  $\log K_2' = 16.5(5)$ .

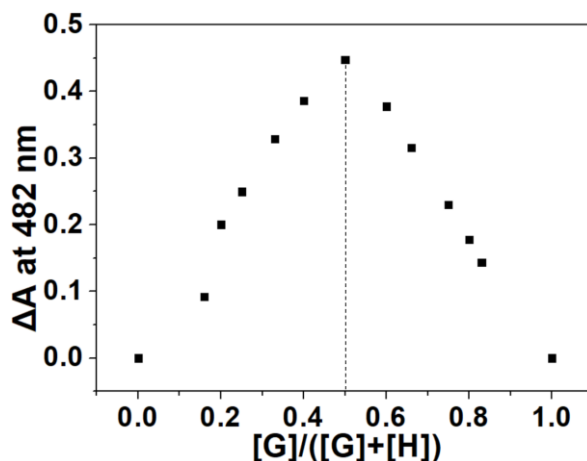

**Figure S45.** Job plot corresponding to the interactions between **TB(phen)** and  $\text{Ag}^+$  in  $\text{CH}_2\text{Cl}_2/\text{CH}_3\text{OH}$  (4:1, v/v) at 298 K as monitored via Uv-vis spectroscopy. [Ligand] + [Metal] = 0.40 mM. Maximum value was seen at 0.50 in the case of  $\text{Ag}^+$ , this supports the 1:1 (ligand/metal) stoichiometry as suggested in the main text.

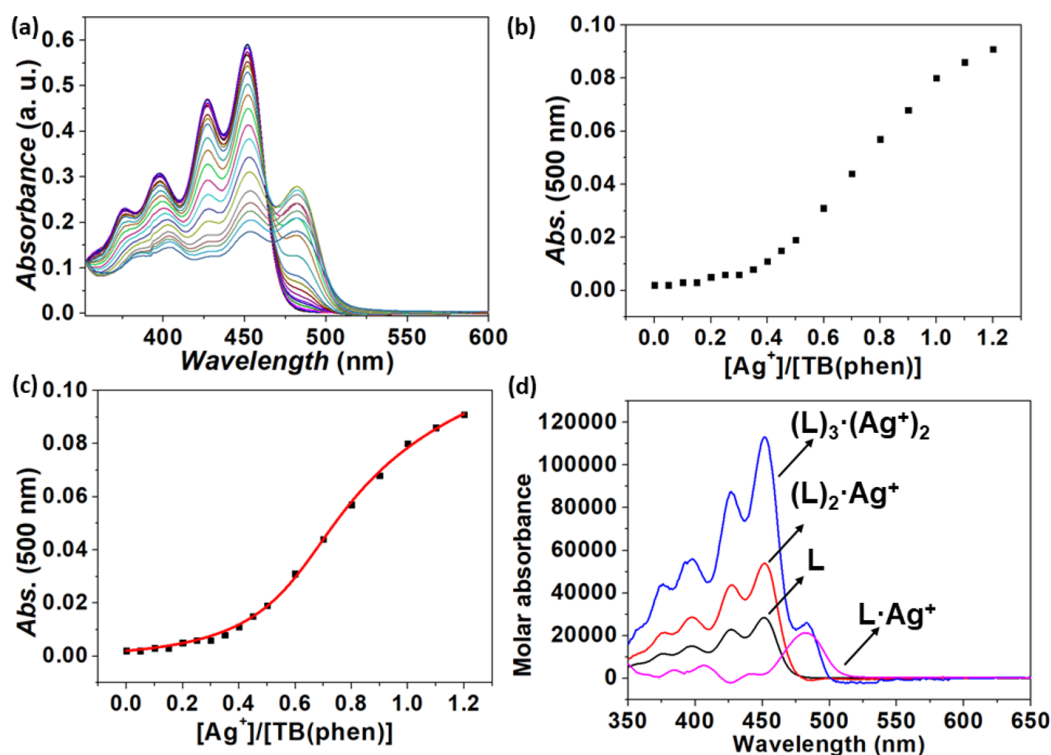

**Figure S46.** (a) Uv-vis spectra recorded corresponding to **TB(phen)** ( $\text{L}$ :  $2.00 \times 10^{-5}$  M in  $\text{CH}_2\text{Cl}_2/\text{CH}_3\text{OH}$  (4:1, v/v)) with increasing  $[\text{Ag}^+]$  (from 0 to 1.2 molar equiv.) at 298 K. (b) The absorbance changes at 500 nm (“■”). And (c) the results of the corresponding nonlinear curve fitting according calculated model (red line) using Hyperquad 2003. (d) The calculated molar absorbance of **TB(phen)** and its complexes. The equilibriums and related  $K_a$  calculation results as shown:  $\text{M} + 2\text{L} \xrightleftharpoons{K_2'} \text{ML}_2$ ;  $\log K_2' = 12.6(3)$ ;  $3\text{M} + 3\text{L} \xrightleftharpoons{K_3'} \text{M}_3\text{L}_2$ ;  $\log K_3' = 24.6(3)$ ;  $\text{M} + \text{L} \xrightleftharpoons{K_1'} \text{ML}$ ;  $\log K_1' = 6.8(6)$ .

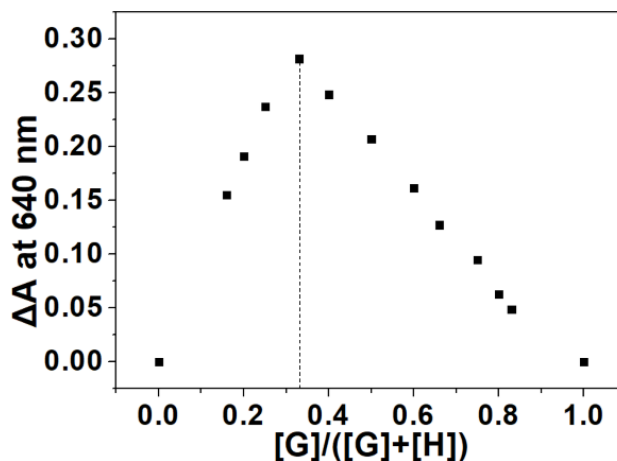

**Figure S47.** Job plot corresponding to the interactions between **TB(phen)** and  $\text{Cu}^{2+}$  in  $\text{CH}_2\text{Cl}_2/\text{CH}_3\text{OH}$  (4:1, v/v) at 298 K as monitored via Uv-vis spectroscopy. [Ligand] + [Metal] = 0.40 mM. Maximum value was seen at 0.33 in the case of  $\text{Cu}^{2+}$ , this supports the 2:1 (ligand/metal) stoichiometry as suggested in the main text.

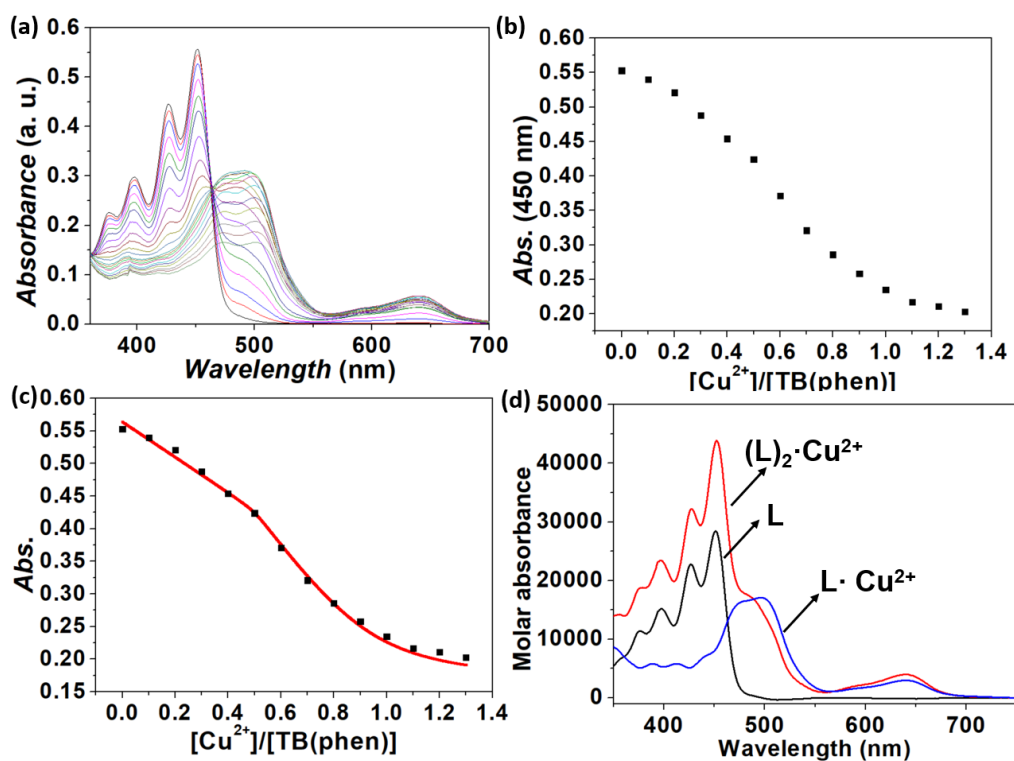

**Figure S48.** (a) Uv-vis spectra recorded corresponding to **TB(phen)** ( $\text{L}$ :  $2.00 \times 10^{-5}$  M in  $\text{CH}_2\text{Cl}_2/\text{CH}_3\text{OH}$  (4:1, v/v)) with increasing  $[\text{Cu}^{2+}]$  (from 0 to 1.3 molar equiv.) at 298 K. (b) The absorbance changes at 450 nm (“■”). And (c) the results of the corresponding nonlinear curve fitting according calculated model (red line) using Hyperquad 2003. (d) The calculated molar absorbance of **TB(phen)** and its complexes. The equilibriums and related  $K_a$  calculation results as shown:  $\text{M} + 2\text{L} \xrightleftharpoons{K_2'} \text{ML}_2$ ;  $\log K_2' = 16.2(2)$ ;  $\text{M} + \text{L} \xrightleftharpoons{K_1} \text{ML}$ ;  $\log K_1 = 8.9(3)$ .

## Fluorescence spectroscopic studies

Fluorescence spectra were detected using an Edinburgh Instruments FS5 spectrometer. A 2000  $\mu\text{L}$  solution of **1** ( $2.00 \times 10^{-5}$  M in  $\text{CH}_2\text{Cl}_2/\text{CH}_3\text{OH}$  (4:1, v/v)) was added to a sample cell. Specific metal ion solution with much higher concentrations ( $1.00 - 8.00 \times 10^{-2}$  M in  $\text{CH}_2\text{Cl}_2/\text{CH}_3\text{OH}$  (4:1, v/v)) were then added gradually. Data were collected after each addition and subsequent mixing.

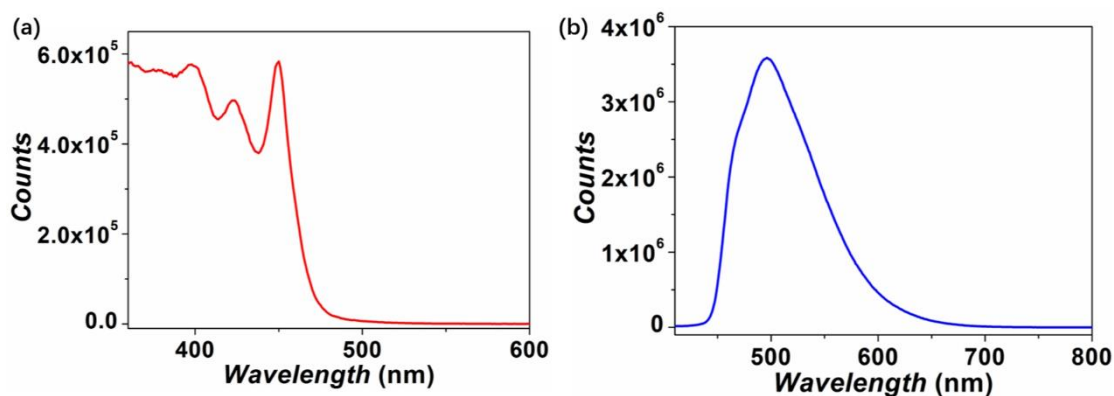

**Figure S49.** Excitation (a) and emission (b) spectra of **1** ( $2.00 \times 10^{-5}$  M in  $\text{CH}_2\text{Cl}_2/\text{CH}_3\text{OH}$  (4:1, v/v),  $\lambda_{\text{em}} = 450$  nm (voltage = 400 V, entrance slit width = 5 nm, exit slit width = 5 nm).

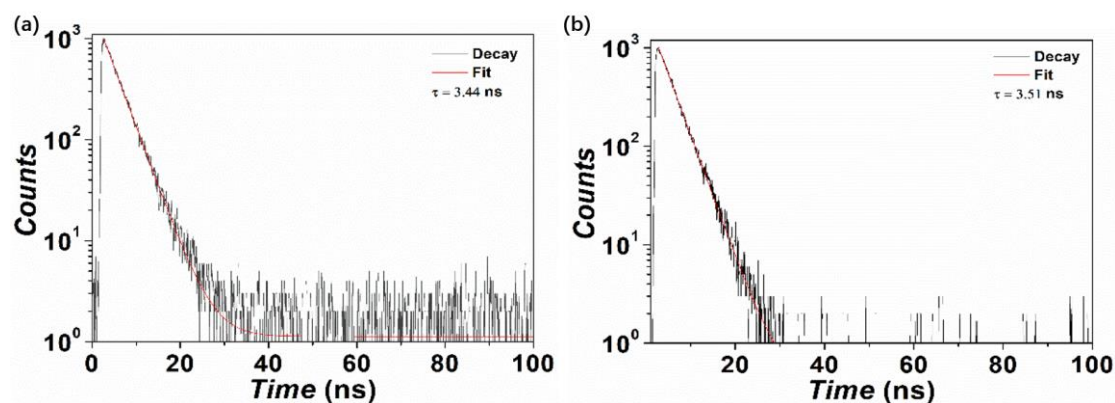

**Figure S50.** The fluorescence lifetime analysis of **1** (a) and **TB(phen)** (b) (each concentration as  $2.00 \times 10^{-5}$  M in  $\text{CH}_2\text{Cl}_2/\text{CH}_3\text{OH}$  (4:1, v/v) with excitation wavelength as 450 nm.

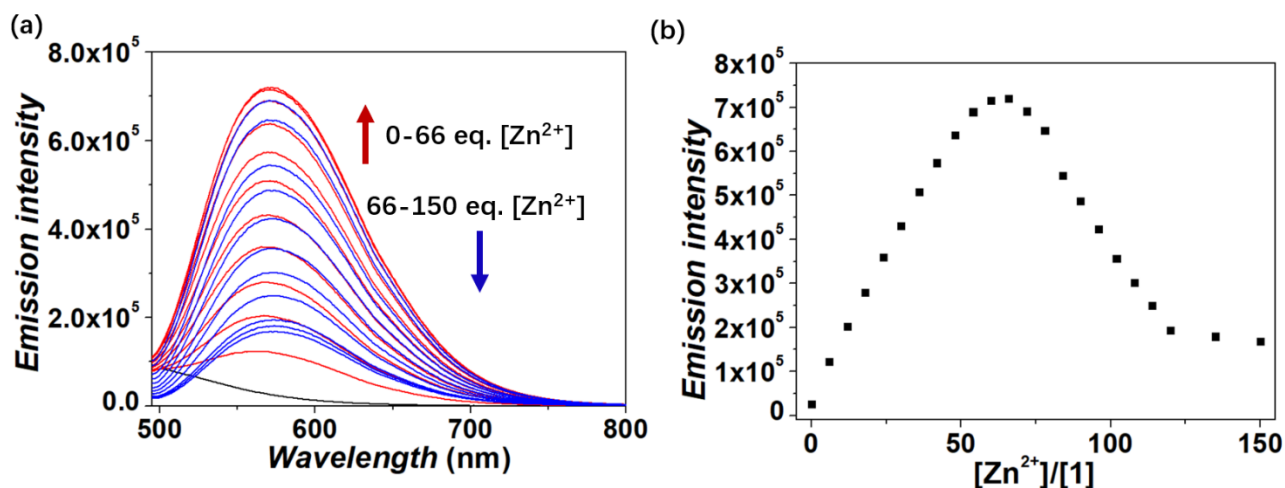

**Figure S51.** (a) Fluorescent emission spectra corresponding to **1** ( $2.00 \times 10^{-5}$  M in CH<sub>2</sub>Cl<sub>2</sub>/CH<sub>3</sub>OH (4:1, v/v)) with increasing [Zn<sup>2+</sup>] (from 0 to 150.0 molar equiv.) at 298 K ( $\lambda_{\text{ex}} = 485$  nm, voltage = 400 V, entrance slit width = 4 nm, exit slit width = 4 nm). (b) The fluorescence intensity changes at 570 nm (“■”). It is noted that the emission increasing with [Zn<sup>2+</sup>]/[**1**] from 0 to 66.0 equiv., and then decreasing with [Zn<sup>2+</sup>]/[**1**] from 66.0 to 150.0 equiv. The change trends are consistent with the corresponding case of Uv-vis titration. The possible reason is suggested as the binding complexity.

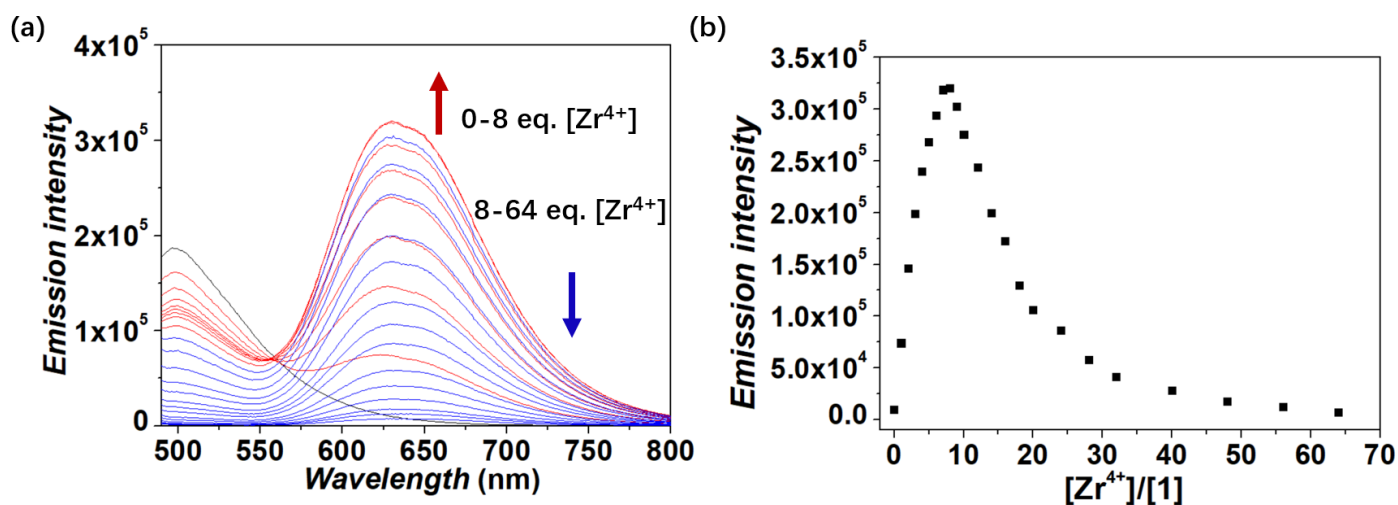

**Figure S52.** (a) Fluorescent emission spectra corresponding to **1** ( $2.00 \times 10^{-5}$  M in CH<sub>2</sub>Cl<sub>2</sub>/CH<sub>3</sub>OH (4:1, v/v)) with increasing [Zr<sup>4+</sup>] (from 0 to 64.0 molar equiv.) at 298 K. ( $\lambda_{\text{ex}} = 480$  nm, Voltage = 400 V, entrance slit width = 4.0 nm, exit slit width = 4.0 nm). (b) The fluorescence intensity changes at 630 nm (“■”).



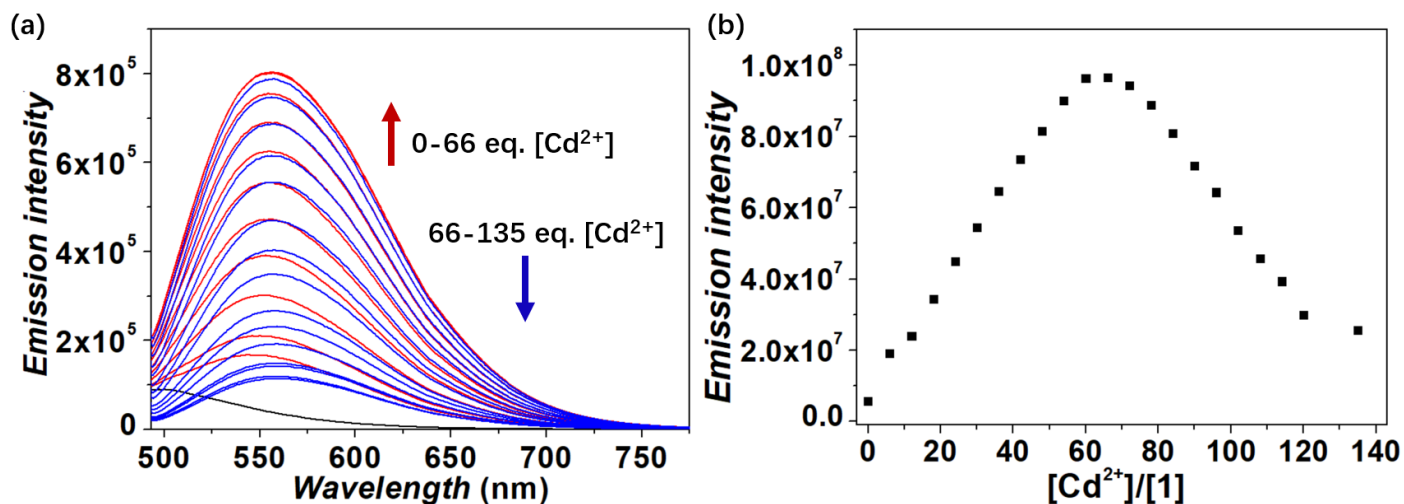

**Figure S53.** (a) Fluorescent emission spectra corresponding to **1** ( $2.00 \times 10^{-5}$  M in CH<sub>2</sub>Cl<sub>2</sub>/CH<sub>3</sub>OH (4:1, v/v)) with increasing [Cd<sup>2+</sup>] (from 0 to 135.0 molar equiv.) at 298 K. ( $\lambda_{\text{ex}} = 485$  nm, Voltage = 400 V, entrance slit width = 4 nm, exit slit width = 4 nm). (b) The fluorescence intensity changes at 555 nm (“■”).

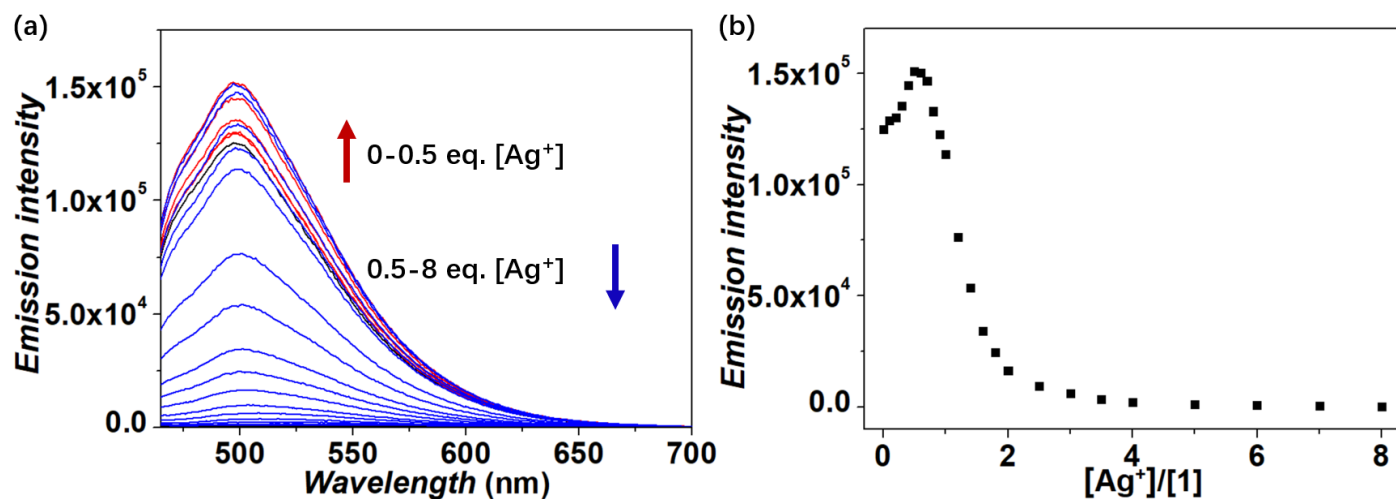

**Figure S54.** (a) Fluorescent emission spectra corresponding to **1** ( $2.00 \times 10^{-5}$  M in CH<sub>2</sub>Cl<sub>2</sub>/CH<sub>3</sub>OH (4:1, v/v)) with increasing [Ag<sup>+</sup>] (from 0 to 8.0 molar equiv.) at 298 K. ( $\lambda_{\text{ex}} = 460$  nm, Voltage = 400 V, entrance slit width = 1.7 nm, exit slit width = 1.7 nm). (b) The fluorescence intensity changes at 500 nm (“■”).



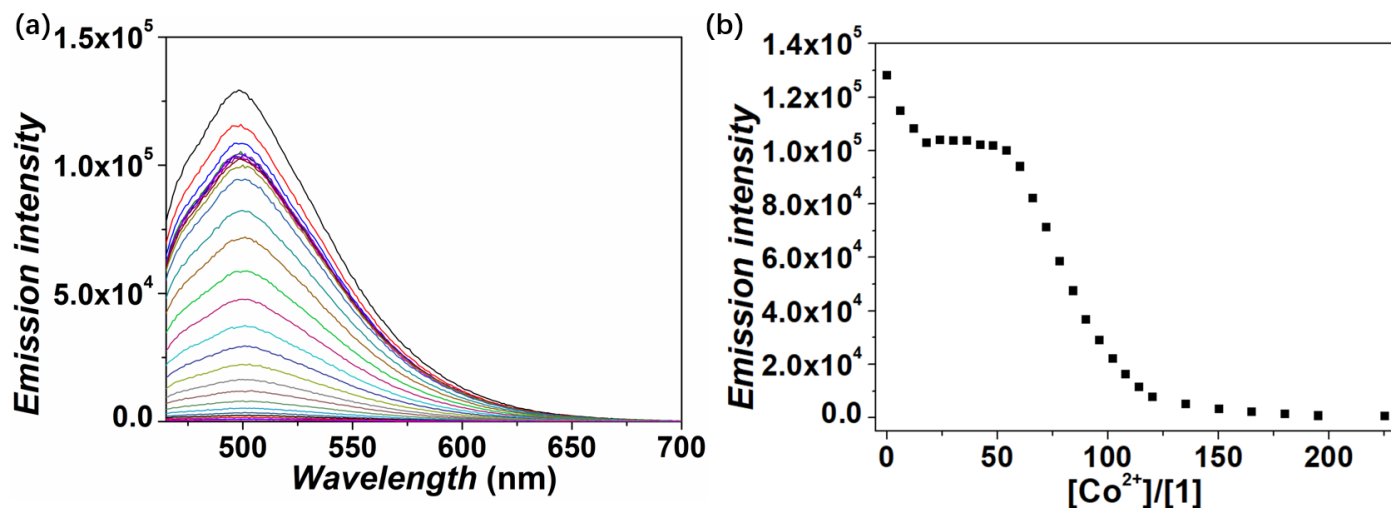

**Figure S55.** (a) Fluorescent emission spectra corresponding to **1** ( $2.00 \times 10^{-5}$  M in CH<sub>2</sub>Cl<sub>2</sub>/CH<sub>3</sub>OH (4:1, v/v)) with increasing [Co<sup>2+</sup>] (from 0 to 225.0 molar equiv.) at 298 K. ( $\lambda_{\text{ex}} = 460$  nm, Voltage = 400 V, entrance slit width = 1.7 nm, exit slit width = 1.7 nm). (b) The fluorescence intensity changes at 500 nm (“■”).

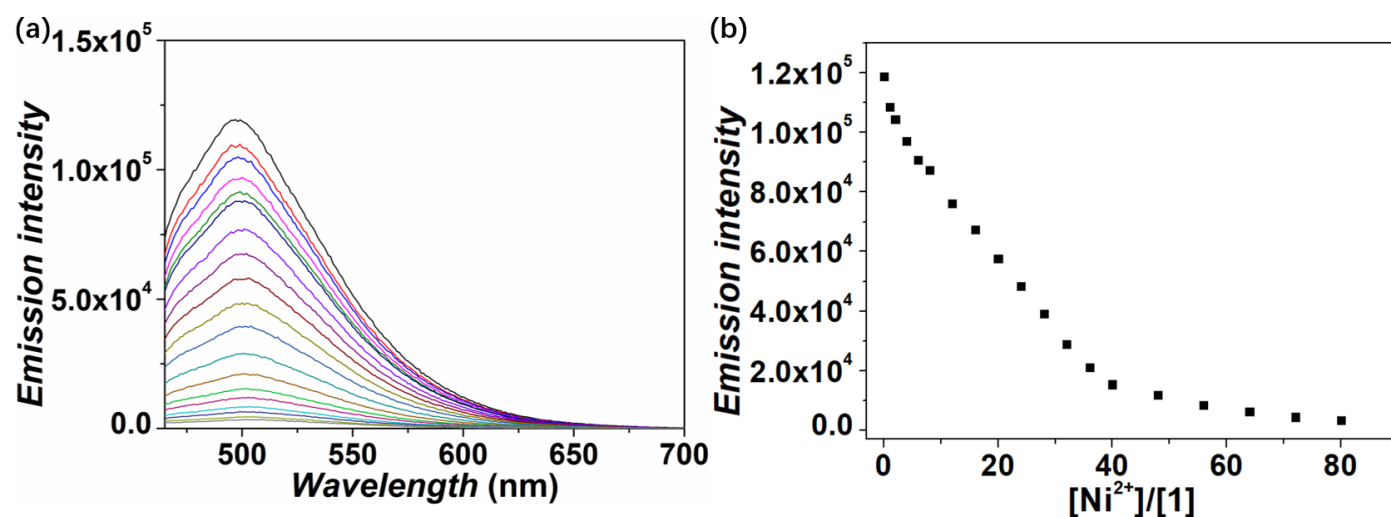

**Figure S56.** (a) Fluorescent emission spectra corresponding to **1** ( $2.00 \times 10^{-5}$  M in CH<sub>2</sub>Cl<sub>2</sub>/CH<sub>3</sub>OH (4:1, v/v)) with increasing [Ni<sup>2+</sup>] (from 0 to 80.0 molar equiv.) at 298 K. ( $\lambda_{\text{ex}} = 460$  nm, Voltage = 400 V, entrance slit width = 1.7 nm, exit slit width = 1.7 nm). (b) The fluorescence intensity changes at 500 nm (“■”).

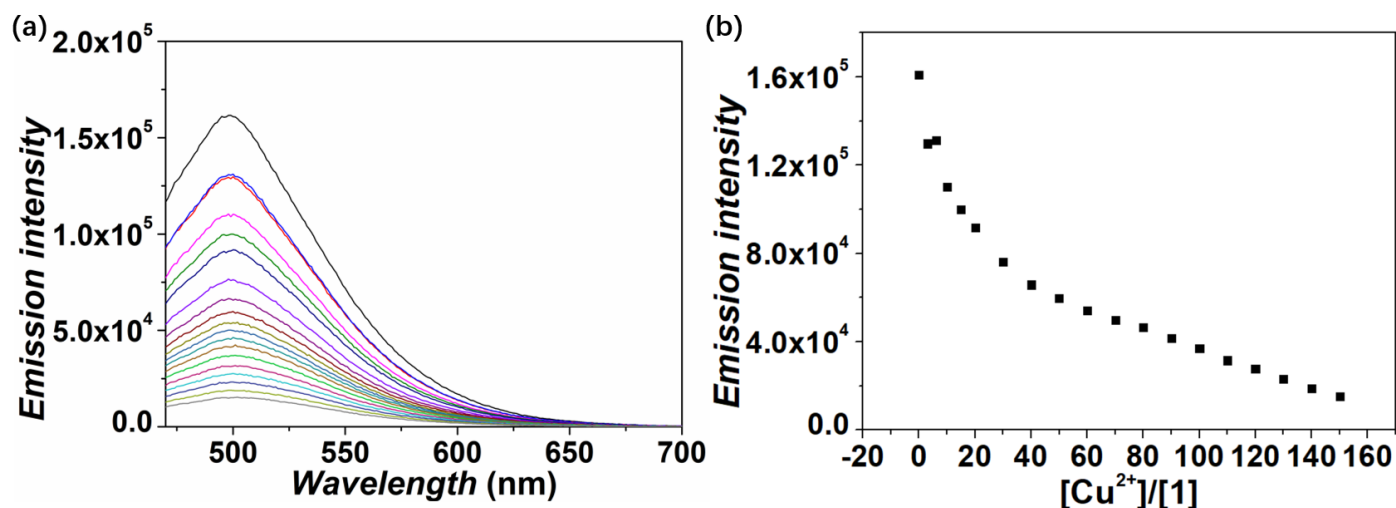

**Figure S57.** (a) Fluorescent emission spectra corresponding to **1** ( $2.00 \times 10^{-5}$  M in  $\text{CH}_2\text{Cl}_2/\text{CH}_3\text{OH}$  (4:1, v/v)) with increasing  $[\text{Cu}^{2+}]$  (from 0 to 150.0 molar equiv.) at 298 K. ( $\lambda_{\text{ex}} = 460$  nm, Voltage = 400 V, entrance slit width = 1.7 nm, exit slit width = 1.8 nm). (b) The fluorescence intensity changes at 500 nm (“■”).

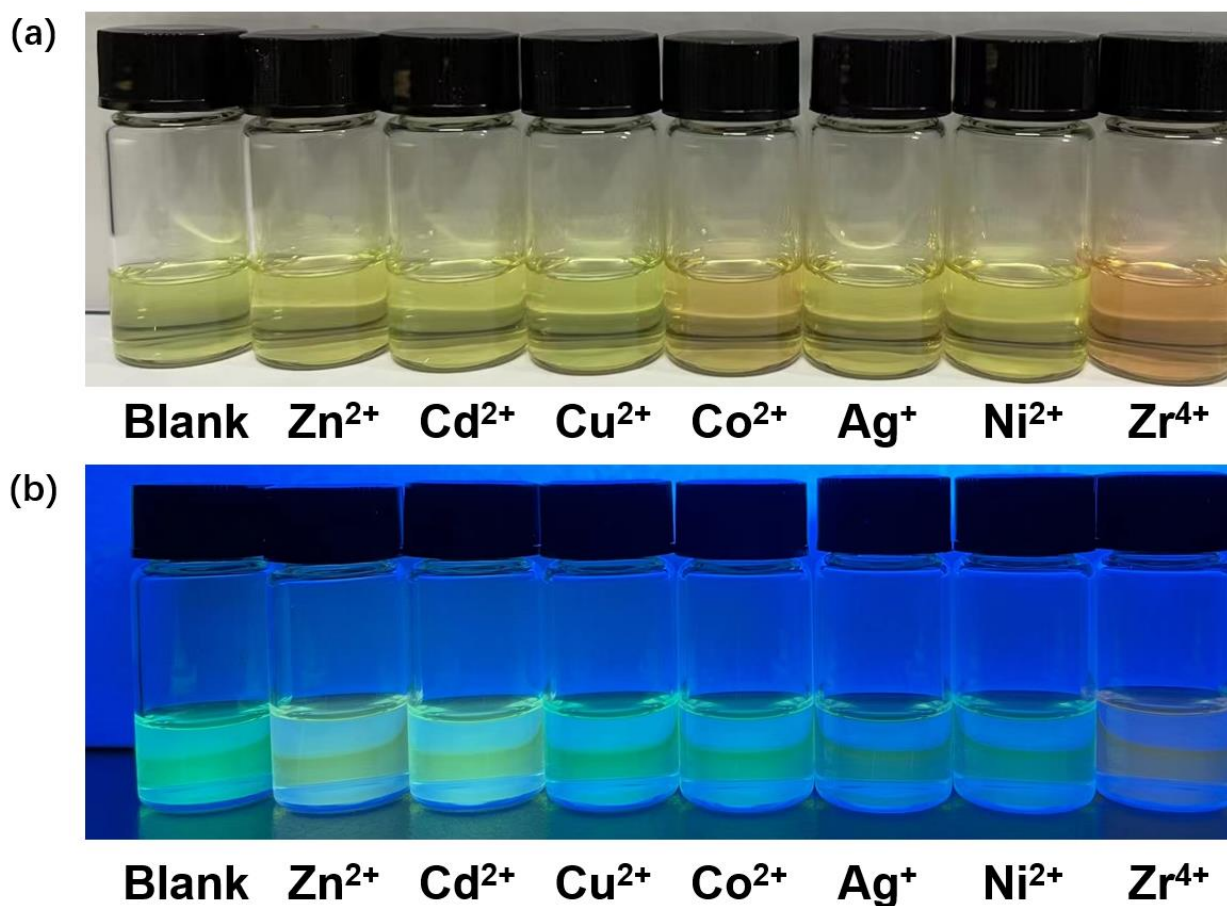

**Figure S58.** Photographs of **1** ( $2.00 \times 10^{-5}$  M) coordination with each transition metal cation (20 molar equiv.) in  $\text{CH}_2\text{Cl}_2/\text{CH}_3\text{OH}$  (4:1, v/v) under (a) visible light and (b) 365 nm UV light, respectively.

### Mass spectra studies of the complexes formed between **1** (L) and metal cations.

Adding 20 molar equiv. of metal cations into the solution of **1** in CH<sub>2</sub>Cl<sub>2</sub>/CH<sub>3</sub>OH (4:1, v/v). The mixture was used for electrospray high resolution mass spectra (ESI-HRMS) analysis with a Bruker Solarix XR FTMS operating in the positive ion model. The signals corresponding to the complexation between **1** and metal cation were observed as below.

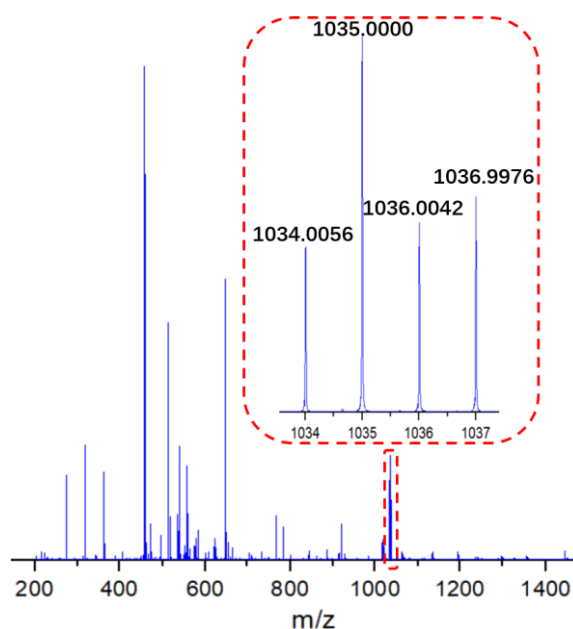

Figure S59. ESI high resolution mass spectrum of the mixture containing **1** and 20 molar equiv. of Co<sup>2+</sup> in CH<sub>2</sub>Cl<sub>2</sub>/CH<sub>3</sub>OH (4:1, v/v). ESI-HRMS (m/z) L<sub>2</sub>·Co<sup>2+</sup>, calcd. for [2L+Co<sup>2+</sup>+NO<sub>3</sub><sup>-</sup>]<sup>+</sup> 1035.0045; found: 1035.0000.

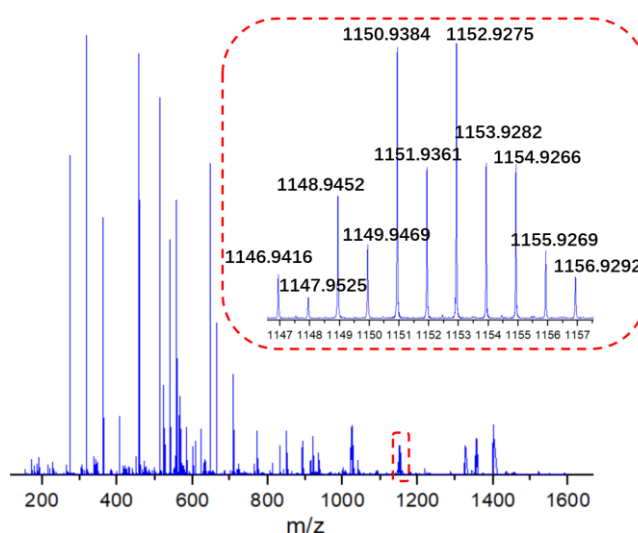

Figure S60. ESI high resolution mass spectrum of the mixture containing **1** and 20 molar equiv. of Zn<sup>2+</sup> in CH<sub>2</sub>Cl<sub>2</sub>/CH<sub>3</sub>OH (4:1, v/v). ESI-HRMS (m/z) L<sub>2</sub>·Zn<sup>2+</sup>, calcd. for [2L+Zn<sup>2+</sup>+2NO<sub>3</sub><sup>-</sup>+2Na<sup>+</sup>-H<sup>+</sup>]<sup>+</sup> 1146.9600; found: 1146.9416.

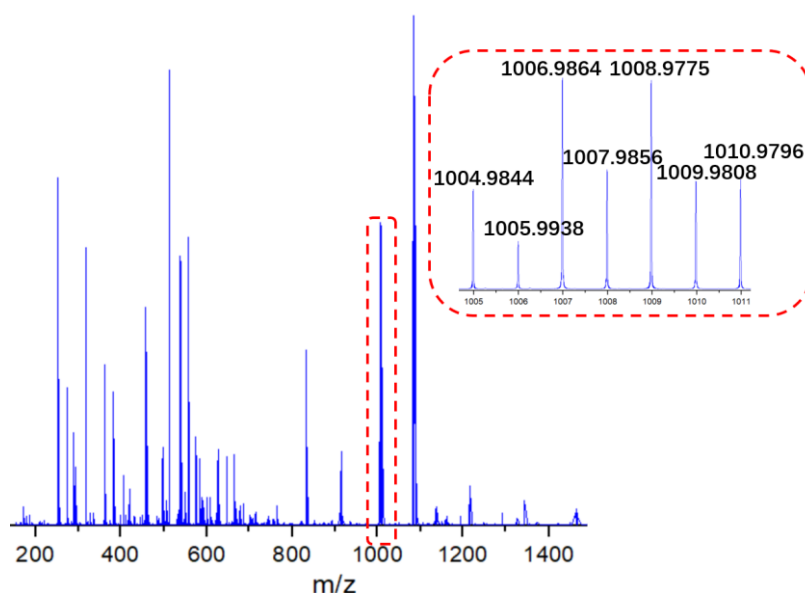

Figure S61. ESI high resolution mass spectrum of the mixture containing **1** and 20 molar equiv. of  $\text{Ni}^{2+}$  in  $\text{CH}_2\text{Cl}_2/\text{CH}_3\text{OH}$  (4:1, v/v). ESI-HRMS (m/z)  $\text{L}_2\cdot\text{Ni}^{2+}$ , calcd. for  $[\text{2L}+\text{Ni}^{2+}+\text{K}^+-2\text{H}^+]^+$  1008.9670; found: 1008.9775.

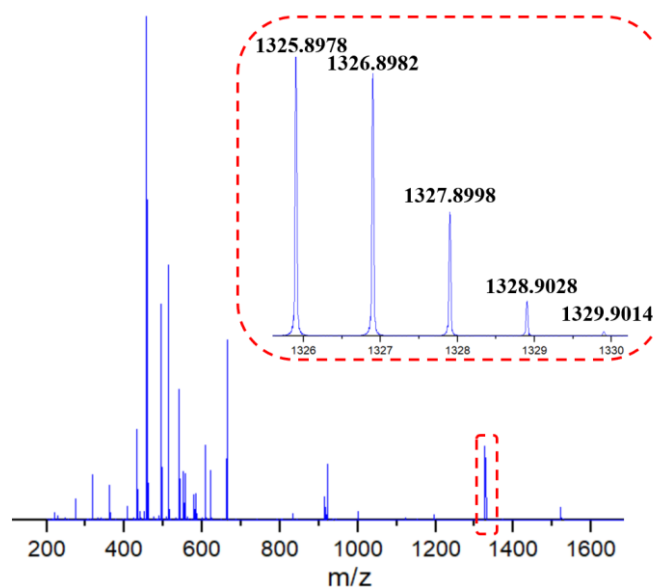

Figure S62. ESI high resolution mass spectrum of the mixture containing **1** and 20 molar equiv. of  $\text{Zr}^{4+}$  in  $\text{CH}_2\text{Cl}_2/\text{CH}_3\text{OH}$  (4:1, v/v). ESI-HRMS (m/z)  $\text{L}_2\cdot\text{Zr}^{4+}$ , calcd. for  $[\text{2L}+\text{Zr}^{4+}+5\text{Cl}^-+2\text{H}_2\text{O}+2\text{CH}_3\text{OH}+2\text{Na}^+]^+$  1326.8826; found: 1326.8982.

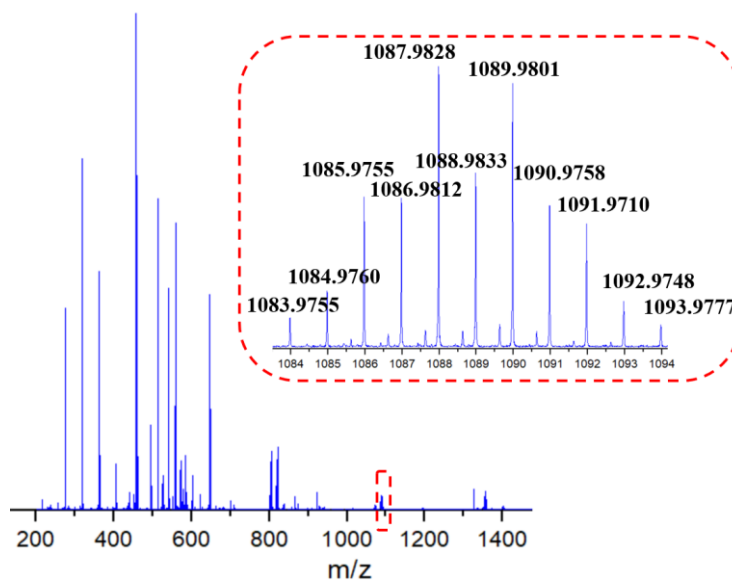

Figure **S63**. ESI high resolution mass spectrum of the mixture containing **1** and 20 molar equiv. of  $\text{Cd}^{2+}$  in  $\text{CH}_2\text{Cl}_2/\text{CH}_3\text{OH}$  (4:1, v/v). ESI-HRMS (m/z)  $\text{L}_2\cdot\text{Cd}^{2+}$ , calcd. for  $[\text{2L}+\text{Cd}^{2+}+\text{H}_2\text{O}+2\text{Na}^+-2\text{H}]^+$  1089.9613; found: 1089.9801.

**Table S2.** Summary of ESI-HRMS Results

| Presumed Complex                  | Peak Assignment                                                                                    | Calculated m/z | Observed m/z |
|-----------------------------------|----------------------------------------------------------------------------------------------------|----------------|--------------|
| $[\text{L}_2\cdot\text{Co}^{2+}]$ | $[\text{2L}+\text{Co}^{2+}+\text{NO}_3^-]^+$                                                       | 1035.0045      | 1035.0000    |
| $[\text{L}_2\cdot\text{Zn}^{2+}]$ | $[\text{2L}+\text{Zn}^{2+}+2\text{NO}_3^-+2\text{Na}^+-\text{H}^+]^+$                              | 1146.9600      | 1146.9416    |
| $[\text{L}_2\cdot\text{Ni}^{2+}]$ | $[\text{2L}+\text{Ni}^{2+}+\text{K}^+-2\text{H}^+]^+$                                              | 1008.9670      | 1008.9775    |
| $[\text{L}_2\cdot\text{Zr}^{4+}]$ | $[\text{2L}+\text{Zr}^{4+}+5\text{Cl}^-+2\text{H}_2\text{O}+2\text{CH}_3\text{OH}+2\text{Na}^+]^+$ | 1326.8826      | 1326.8982    |
| $[\text{L}_2\cdot\text{Cd}^{2+}]$ | $[\text{2L}+\text{Cd}^{2+}+\text{H}_2\text{O}+2\text{Na}^+-2\text{H}^+]^+$                         | 1089.9613      | 1089.9801    |

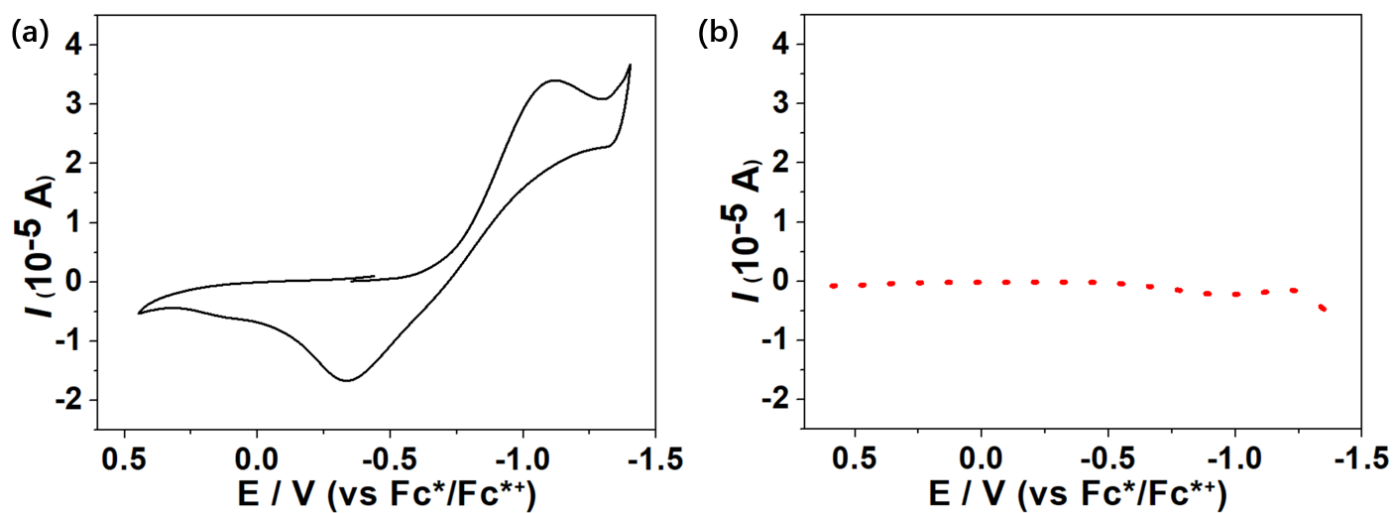

**Figure S64.** CV (black solid lines) (a) and DPV (red dashed lines) (b) curves of **1**.

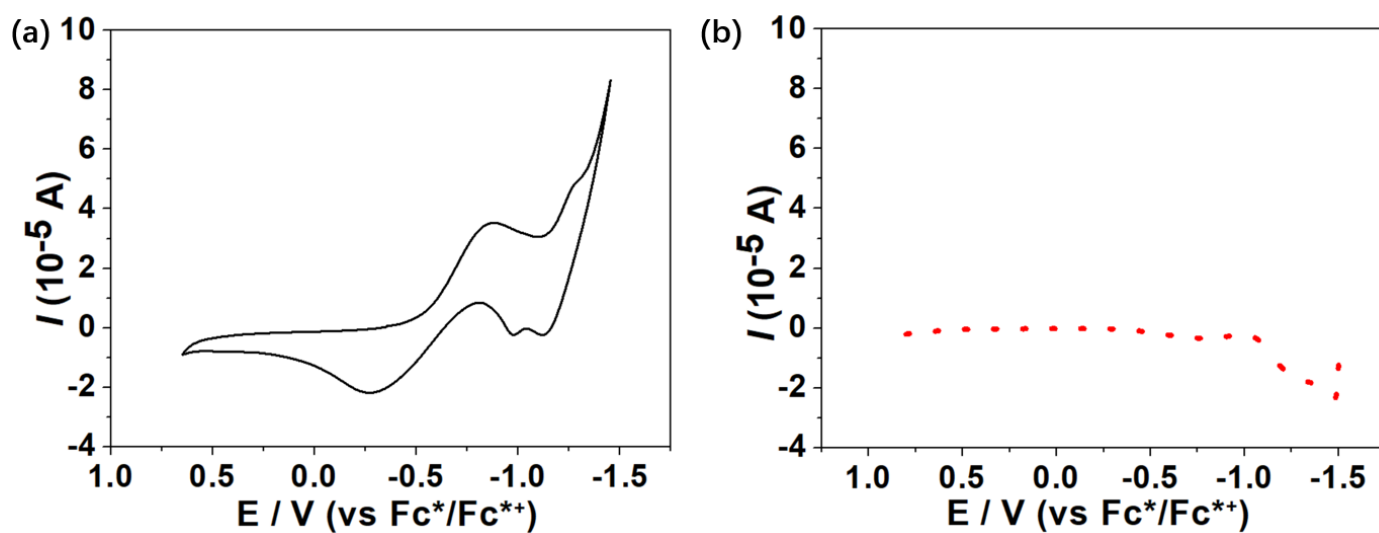

**Figure S65.** CV (black solid lines) (a) and DPV (red dashed lines) (b) curves of **TB(phen)**.

**Section S5:** Single crystal X-ray diffraction analyses of  $[1 \cdot \text{Zn}^{2+} \cdot (\text{NO}_3^-)_2] \cdot \text{CH}_3\text{OH}$  and  $[1 \cdot \text{Cd}^{2+} \cdot (\text{NO}_3^-)_2] \cdot 2\text{CH}_3\text{OH}$ .

**Table S3.** Crystal data and structure refinement for  $[1 \cdot \text{Zn}^{2+} \cdot (\text{NO}_3^-)_2] \cdot \text{CH}_3\text{OH}$  and  $[1 \cdot \text{Cd}^{2+} \cdot (\text{NO}_3^-)_2] \cdot 2\text{CH}_3\text{OH}$ .

|                                                | $[1 \cdot \text{Zn}^{2+} \cdot (\text{NO}_3^-)_2] \cdot \text{CH}_3\text{OH}$ | $[1 \cdot \text{Cd}^{2+} \cdot (\text{NO}_3^-)_2] \cdot 2\text{CH}_3\text{OH}$ |
|------------------------------------------------|-------------------------------------------------------------------------------|--------------------------------------------------------------------------------|
| Identification code                            | 2305344                                                                       | 2305338                                                                        |
| Empirical formula                              | $\text{C}_{29}\text{H}_{22}\text{N}_4\text{O}_9\text{ZnCl}_4$                 | $\text{C}_{28}\text{H}_{22}\text{CdCl}_2\text{N}_4\text{O}_{10}$               |
| Formula weight                                 | 777.67                                                                        | 757.79                                                                         |
| Temperature/K                                  | 170(2)                                                                        | 170(2)                                                                         |
| Crystal system                                 | orthorhombic                                                                  | triclinic                                                                      |
| Space group                                    | Pnma                                                                          | P-1                                                                            |
| a/Å                                            | 10.9906(6)                                                                    | 7.1379(3)                                                                      |
| b/Å                                            | 39.8868(16)                                                                   | 13.0556(3)                                                                     |
| c/Å                                            | 13.6742(4)                                                                    | 15.0668(3)                                                                     |
| $\alpha/^\circ$                                | 90                                                                            | 88.113(2)                                                                      |
| $\beta/^\circ$                                 | 90                                                                            | 76.842(2)                                                                      |
| $\gamma/^\circ$                                | 90                                                                            | 86.089(2)                                                                      |
| Volume/Å <sup>3</sup>                          | 5994.5(4)                                                                     | 1363.80(7)                                                                     |
| Z                                              | 8                                                                             | 2                                                                              |
| $\rho_{\text{calc}}/\text{g cm}^{-3}$          | 1.723                                                                         | 1.845                                                                          |
| $\mu/\text{mm}^{-1}$                           | 4.978                                                                         | 8.835                                                                          |
| F(000)                                         | 3152.0                                                                        | 760.0                                                                          |
| Crystal size/mm <sup>3</sup>                   | 0.060 × 0.040 × 0.010                                                         | 0.060 × 0.030 × 0.020                                                          |
| Radiation                                      | $\text{CuK}\alpha$ ( $\lambda = 1.54184$ )                                    | $\text{CuK}\alpha$ ( $\lambda = 1.54184$ )                                     |
| 2 $\theta$ range for data collection/ $^\circ$ | 6.834 to 124.982                                                              | 6.026 to 124.966                                                               |
| Index ranges                                   | $-12 \leq h \leq 12, -36 \leq k \leq 45, -15 \leq l \leq 6$                   | $-8 \leq h \leq 8, -12 \leq k \leq 14, -17 \leq l \leq 17$                     |
| Reflections collected                          | 20945                                                                         | 16700                                                                          |
| Independent reflections                        | 4848 [ $R_{\text{int}} = 0.0759, R_{\text{sigma}} = 0.0582$ ]                 | 4343 [ $R_{\text{int}} = 0.0542, R_{\text{sigma}} = 0.0502$ ]                  |
| Data/restraints/parameters                     | 4848/6/439                                                                    | 4343/2/412                                                                     |
| Goodness-of-fit on $F^2$                       | 1.020                                                                         | 1.034                                                                          |
| Final R indexes [ $I \geq 2\sigma(I)$ ]        | $R_1 = 0.0982, wR_2 = 0.2180$                                                 | $R_1 = 0.0361, wR_2 = 0.0861$                                                  |
| Final R indexes [all data]                     | $R_1 = 0.1194, wR_2 = 0.2319$                                                 | $R_1 = 0.0403, wR_2 = 0.0882$                                                  |
| Largest diff. peak/hole / e Å <sup>-3</sup>    | 1.84/-0.57                                                                    | 1.20/-0.43                                                                     |

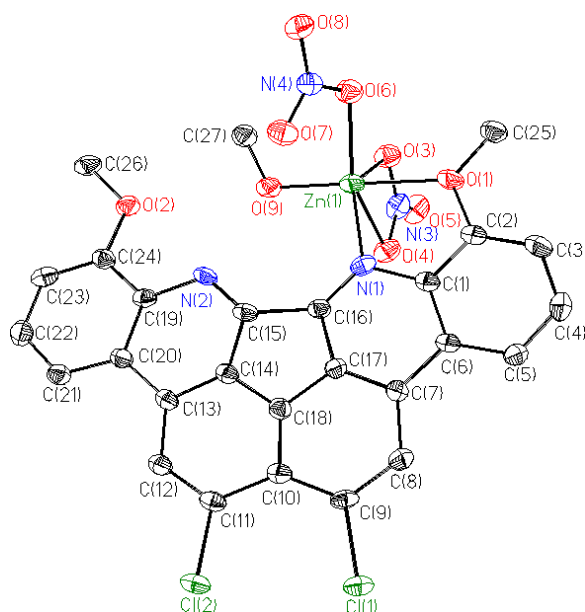

**Figure S66.** Ellipsoid form showing  $1 \cdot \text{Zn}^{2+} \cdot (\text{NO}_3^-)_2$  in the single crystal structure of  $[1 \cdot \text{Zn}^{2+} \cdot (\text{NO}_3^-)_2 \cdot \text{CH}_3\text{OH}]$ . Displacement ellipsoids are scaled to the 50% probability level. All the other molecules and atoms have been omitted for clarity. Selected interatomic lengths (Å): Zn(1)...N(1) 2.11(6), Zn(1)...O(1) 2.20(7), Zn(1)...O(3) 2.10(6), Zn(1)...O(4) 2.36(6), Zn(1)...O(6) 2.03(6), Zn(1)...O(9) 2.01(6). Selected interatomic angles:  $\angle \text{O}(1) \dots \text{Zn}(1) \dots \text{O}(4)$  86.3(2)°,  $\angle \text{O}(3) \dots \text{Zn}(1) \dots \text{O}(1)$  85.1(2)°,  $\angle \text{O}(3) \dots \text{Zn}(1) \dots \text{O}(4)$  57.0(2)°,  $\angle \text{O}(3) \dots \text{Zn}(1) \dots \text{N}(1)$  134.4(3)°,  $\angle \text{O}(6) \dots \text{Zn}(1) \dots \text{O}(1)$  84.4(3)°,  $\angle \text{O}(6) \dots \text{Zn}(1) \dots \text{O}(3)$  88.6(3)°,  $\angle \text{O}(6) \dots \text{Zn}(1) \dots \text{O}(4)$  144.9(2)°,  $\angle \text{O}(6) \dots \text{Zn}(1) \dots \text{N}(1)$  128.3(3)°,  $\angle \text{O}(9) \dots \text{Zn}(1) \dots \text{O}(1)$  175.5(2)°,  $\angle \text{O}(9) \dots \text{Zn}(1) \dots \text{O}(3)$  90.7(3)°,  $\angle \text{O}(9) \dots \text{Zn}(1) \dots \text{O}(4)$  90.2(2)°,  $\angle \text{O}(9) \dots \text{Zn}(1) \dots \text{O}(6)$  97.0(3)°,  $\angle \text{O}(9) \dots \text{Zn}(1) \dots \text{O}(4)$  90.2(2)°,  $\angle \text{O}(9) \dots \text{Zn}(1) \dots \text{O}(6)$  97.0(3)°,  $\angle \text{O}(9) \dots \text{Zn}(1) \dots \text{N}(1)$  107.5(2)°,  $\angle \text{N}(1) \dots \text{Zn}(1) \dots \text{O}(1)$  74.7(2)°,  $\angle \text{N}(1) \dots \text{Zn}(1) \dots \text{O}(4)$  80.9(2)°.

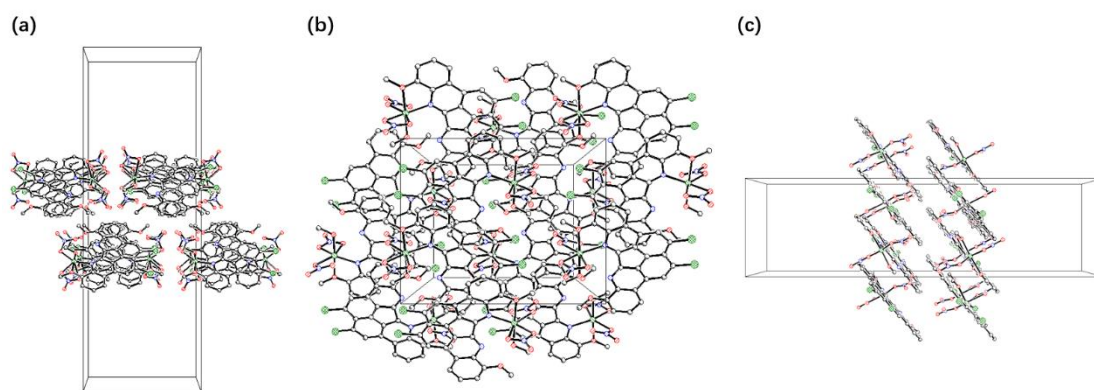

**Figure S67.** Packing diagram in the single crystal structure of  $[1 \cdot \text{Zn}^{2+} \cdot (\text{NO}_3^-)_2] \cdot \text{CH}_3\text{OH}$  along with *a* (a); *b* (b); *c* (c) cell axis.



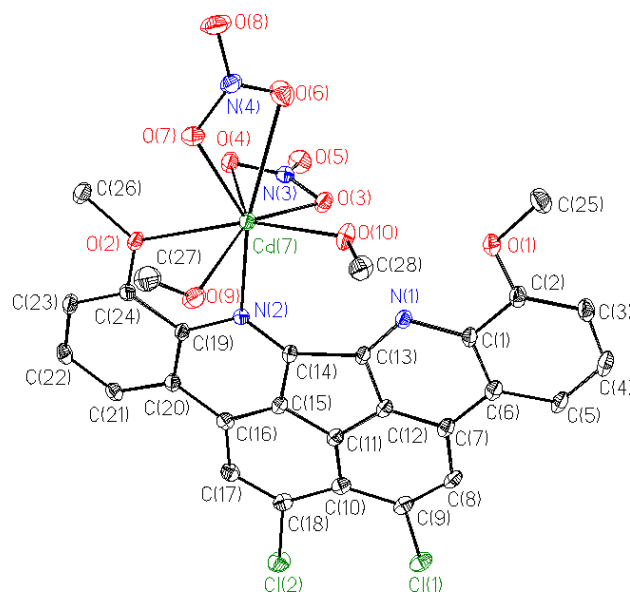

**Figure S68.** Ellipsoid form showing  $1 \cdot \text{Cd}^{2+} \cdot (\text{NO}_3^-)_2$  in the single crystal structure of  $[1 \cdot \text{Cd}^{2+} \cdot (\text{NO}_3^-)_2] \cdot 2\text{CH}_3\text{OH}$ . Displacement ellipsoids are scaled to the 50% probability level. All the other molecules and atoms have been omitted for clarity. Selected interatomic lengths (Å): Cd(7)...N(2) 2.38(4), Cd(7)...O(2) 2.43(7), Cd(7)...O(3) 2.43(1), Cd(7)...O(4) 2.53(0), Cd(7)...O(6) 2.61(8), Cd(7)...O(7) 2.28(6), Cd(7)...O(9) 2.40(5). Selected interatomic angles:  $\angle \text{O}(2) \dots \text{Cd}(7) \dots \text{N}(2)$  68.1(5)°,  $\angle \text{N}(2) \dots \text{Cd}(7) \dots \text{O}(10)$  103.4(2)°,  $\angle \text{O}(10) \dots \text{Cd}(7) \dots \text{O}(3)$  81.7(4)°,  $\angle \text{O}(3) \dots \text{Cd}(7) \dots \text{O}(4)$  51.5(3)°,  $\angle \text{O}(4) \dots \text{Cd}(7) \dots \text{O}(2)$  70.1(4)°,  $\angle \text{O}(2) \dots \text{Cd}(7) \dots \text{O}(9)$  74.6(7)°,  $\angle \text{N}(2) \dots \text{Cd}(7) \dots \text{O}(9)$  82.1(1)°,  $\angle \text{O}(10) \dots \text{Cd}(7) \dots \text{O}(9)$  85.6(4)°,  $\angle \text{O}(3) \dots \text{Cd}(7) \dots \text{O}(9)$  151.1(4)°,  $\angle \text{O}(4) \dots \text{Cd}(7) \dots \text{O}(9)$  144.8(1)°,  $\angle \text{O}(2) \dots \text{Cd}(7) \dots \text{O}(7)$  82.7(4)°,  $\angle \text{N}(2) \dots \text{Cd}(7) \dots \text{O}(7)$  149.8(6)°,  $\angle \text{O}(10) \dots \text{Cd}(7) \dots \text{O}(7)$  101.2(8)°,  $\angle \text{O}(3) \dots \text{Cd}(7) \dots \text{O}(7)$  125.0(6)°,  $\angle \text{O}(4) \dots \text{Cd}(7) \dots \text{O}(7)$  92.5(9)°,  $\angle \text{O}(2) \dots \text{Cd}(7) \dots \text{O}(6)$  116.0(3)°,  $\angle \text{N}(2) \dots \text{Cd}(7) \dots \text{O}(6)$  150.4(1)°,  $\angle \text{O}(10) \dots \text{Cd}(7) \dots \text{O}(6)$  80.9(3)°,  $\angle \text{O}(3) \dots \text{Cd}(7) \dots \text{O}(6)$  75.9(4)°,  $\angle \text{O}(4) \dots \text{Cd}(7) \dots \text{O}(6)$  70.6(0)°,  $\angle \text{O}(6) \dots \text{Cd}(7) \dots \text{O}(7)$  51.2(4)°.

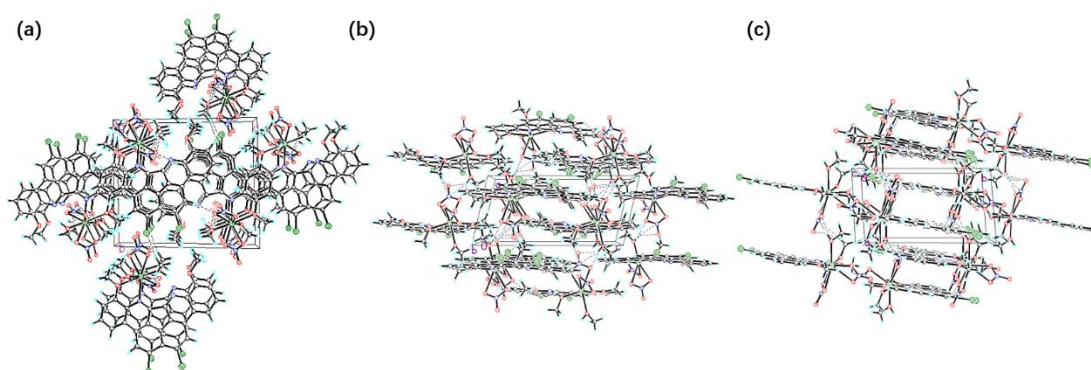

**Figure S69.** Packing diagram in the single crystal structure of  $[1 \cdot \text{Cd}^{2+} \cdot (\text{NO}_3^-)_2] \cdot \text{CH}_3\text{OH}$  along with *a* (a); *b* (b); *c* (c) cell axis.

## Section S6: Theoretical Calculations

Theoretical calculations were carried out with the Gaussian 09 software package<sup>8</sup>. Geometry optimization was performed at the B3LYP level of density functional theory (DFT) with the 6-31G(d) basis set. The first ten vertical transition energies were calculated by time-dependent density functional theory (TD-DFT) at the B3LYP/6-31G(d) level (over optimized geometries at the same level). The first five states and corresponding main single electron transition for quinolino[2',3',4':3,4]indeno[2,1,7-*ghi*]phenanthridine (**2**), **1** and **TB(phen)** were listed in **Tables S4-S6**. Uv-vis absorption spectrum of **2**, **1** and **TB(phen)** were simulated according to TD-DFT results. The minimum structure of **2**, **1** and **TB(phen)** in the excited state  $S_1$  were optimized at the B3LYP/6-31G(d) level of TD-DFT. Similarly, vibration frequency analysis confirmed local minima.

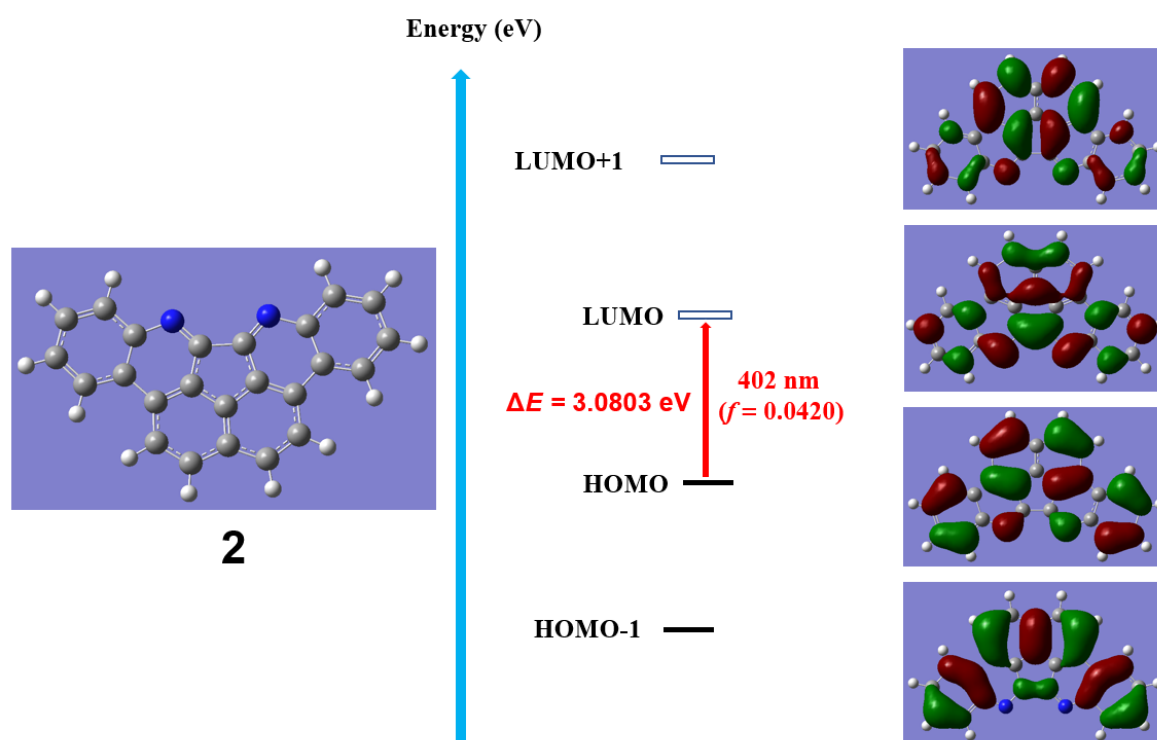

**Figure S70.** Molecular orbitals of **2**. TD-DFT result of the  $S_0$ - $S_1$  transition was indicated by a red arrow.

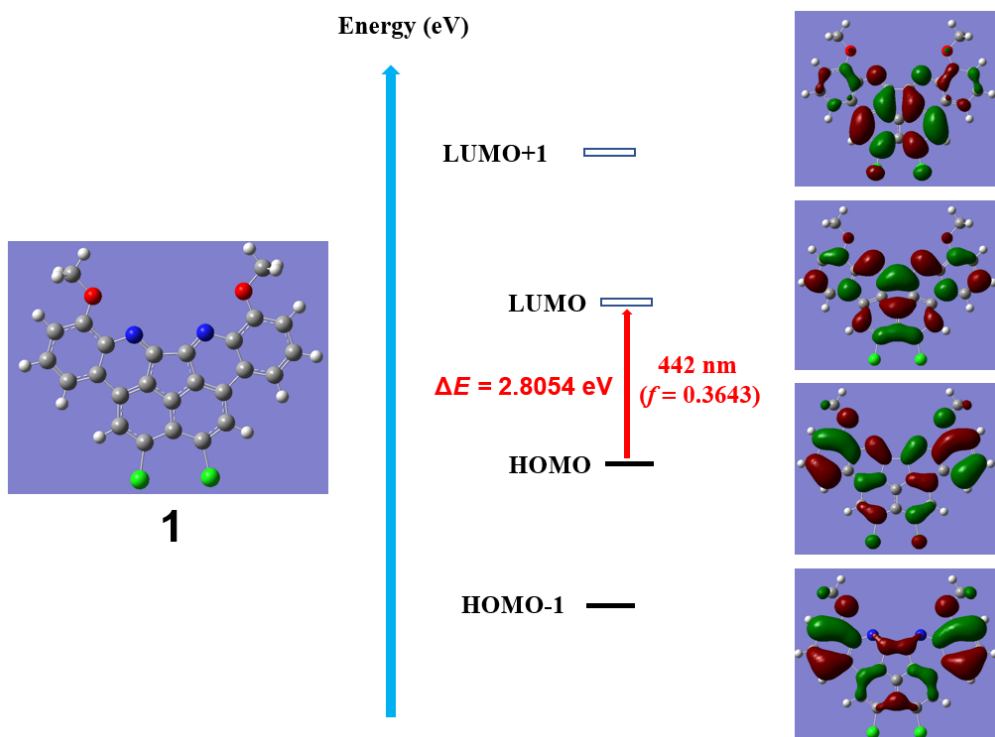

**Figure S71.** Molecular orbitals of **1**. TD-DFT result of the  $S_0$ - $S_1$  transition was indicated by a red arrow.

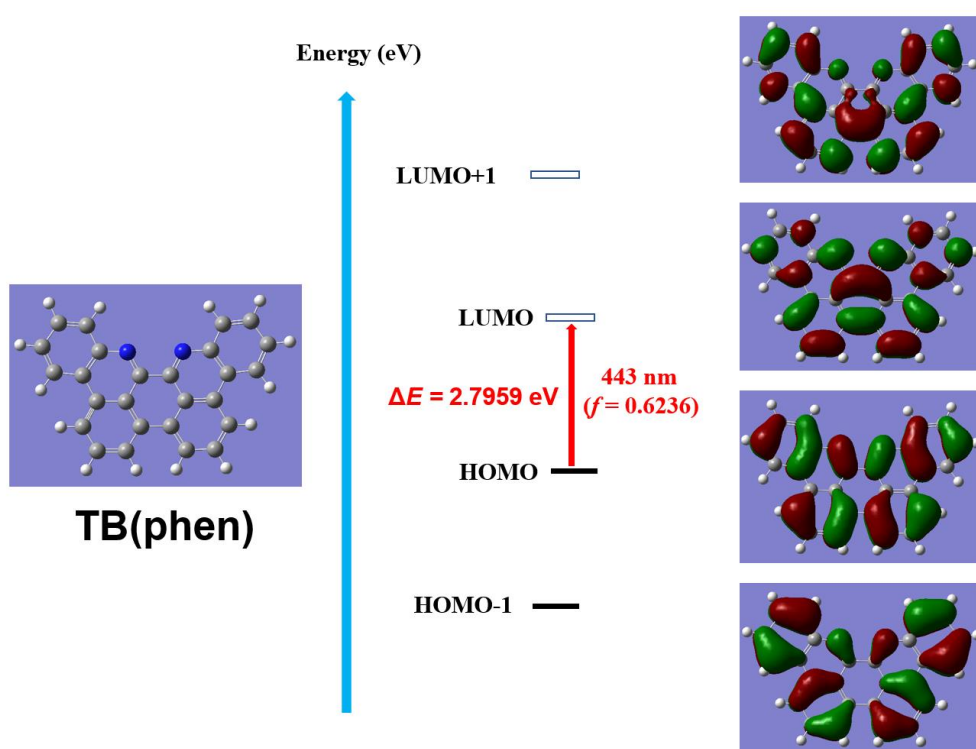

**Figure S72.** Molecular orbitals of **TB(phen)**. TD-DFT result of the  $S_0$ - $S_1$  transition was indicated by a red arrow.

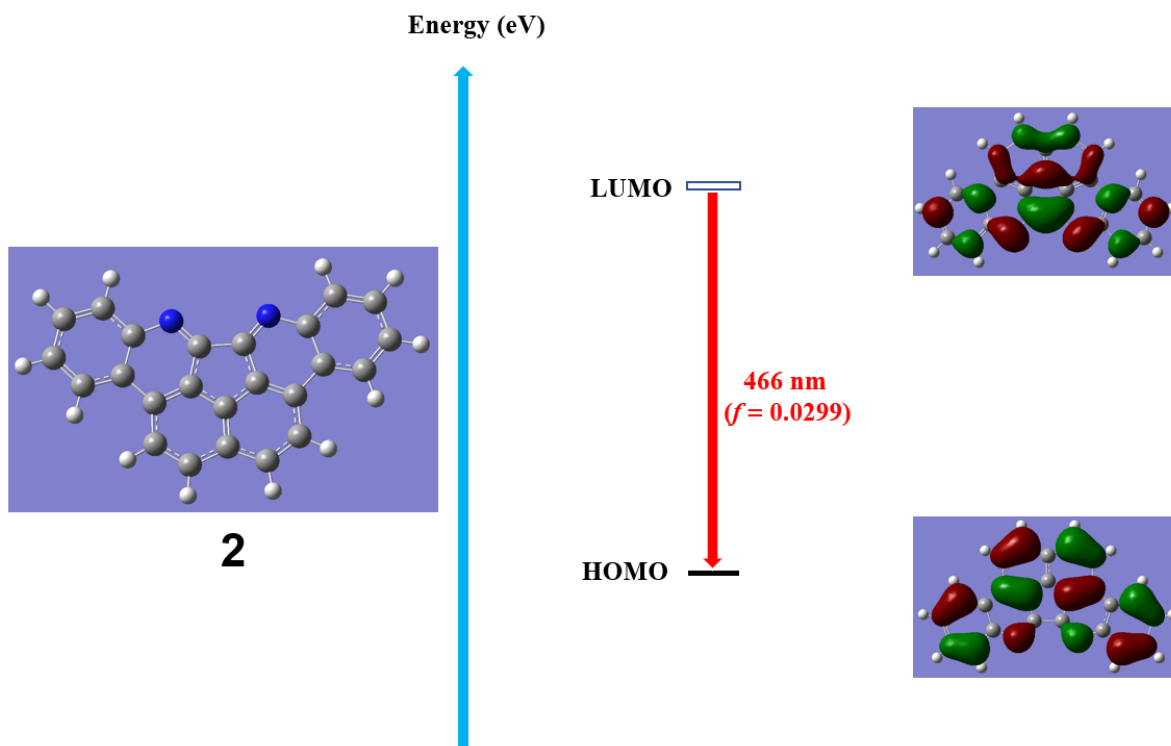

**Figure S73.** Molecular orbitals of **2** in excited state  $S_1$ . TD-DFT result of the  $S_1$ - $S_0$  transition was indicated by a red arrow.

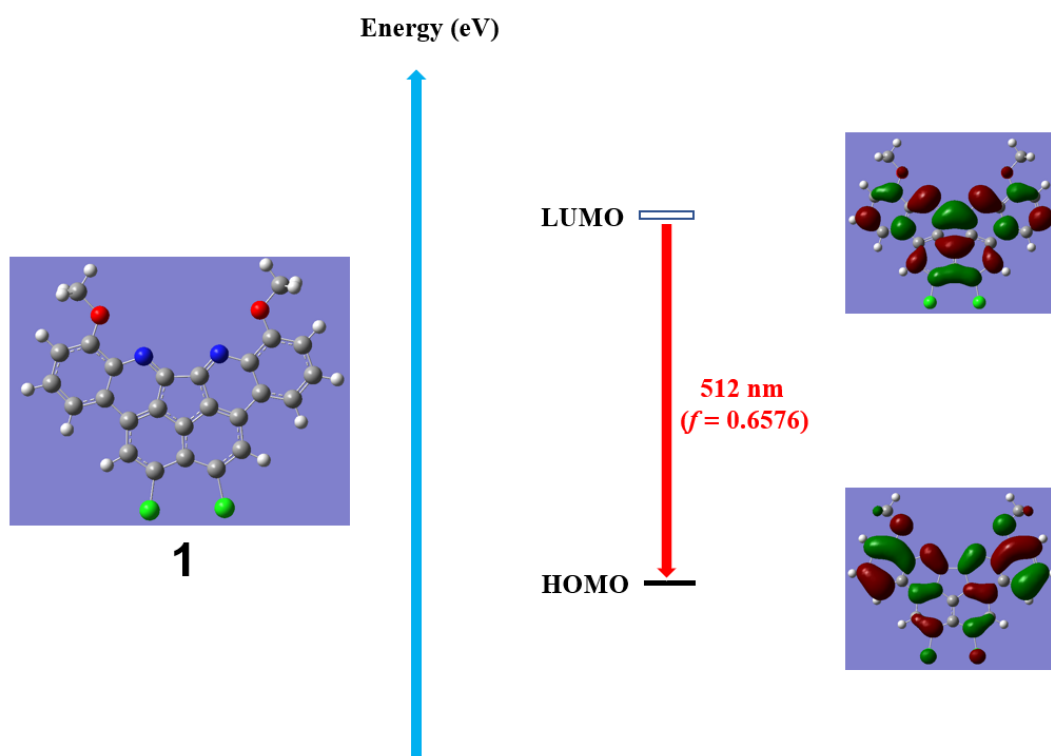

**Figure S74.** Molecular orbitals of **1** in excited state  $S_1$ . TD-DFT result of the  $S_1$ - $S_0$  transition was indicated by a red arrow.

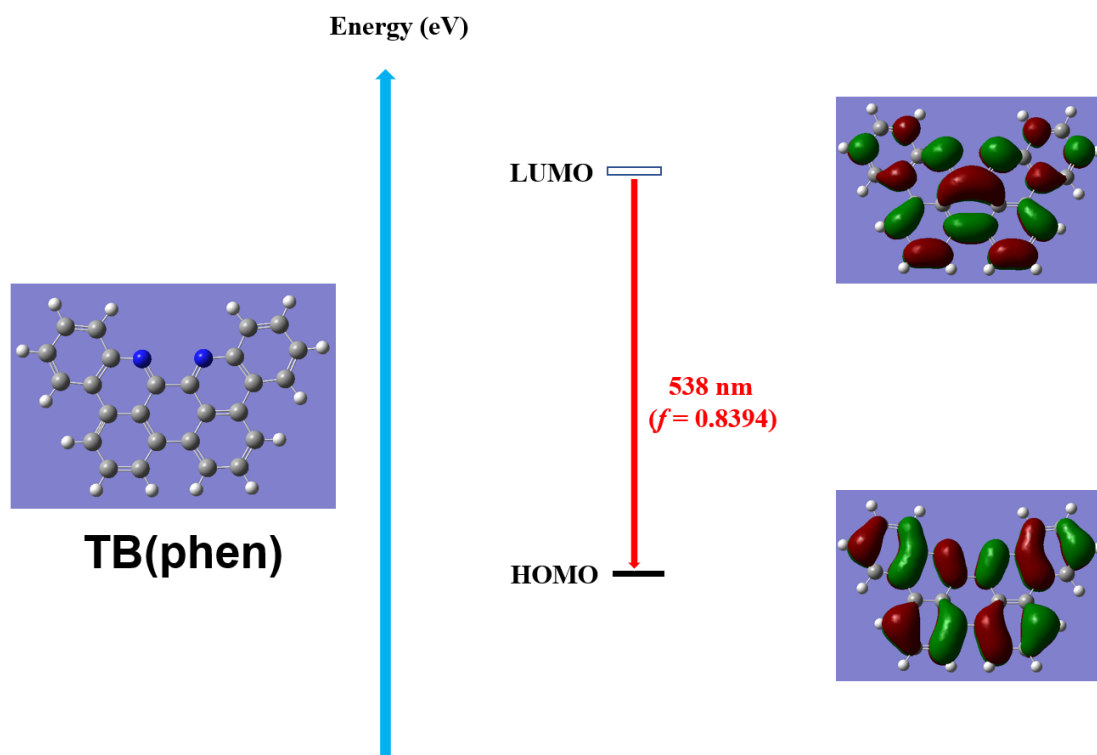

**Figure S75.** Molecular orbitals of **TB(phen)** in excited state  $S_1$ . TD-DFT result of the  $S_1$ - $S_0$  transition was indicated by a red arrow.

**Table S4.** TD-DFT calculation data for the ground state **2**.

| Transition            | Energy (eV) | Wavelength (nm) | Osc. Strength | Contributions                                                                                                      |
|-----------------------|-------------|-----------------|---------------|--------------------------------------------------------------------------------------------------------------------|
| $S_0 \rightarrow S_1$ | 3.0803      | 402             | 0.0420        | H-2 $\rightarrow$ L (15%)<br>H $\rightarrow$ L (83%)                                                               |
| $S_0 \rightarrow S_2$ | 3.3057      | 375             | 0.0094        | H-1 $\rightarrow$ L (95%)<br>H $\rightarrow$ L+1 (4%)                                                              |
| $S_0 \rightarrow S_3$ | 3.5217      | 352             | 0.3239        | H-2 $\rightarrow$ L (78%)<br>H-1 $\rightarrow$ L+1 (6%)<br>H $\rightarrow$ L (13%)                                 |
| $S_0 \rightarrow S_4$ |             |                 |               | H-4 $\rightarrow$ L (98%)                                                                                          |
| $S_0 \rightarrow S_5$ | 3.7939      | 326             | 0.0658        | H-3 $\rightarrow$ L (50%)<br>H-2 $\rightarrow$ L+1 (5%)<br>H-1 $\rightarrow$ L+2 (6%)<br>H $\rightarrow$ L+1 (36%) |

**Table S5.** TD-DFT calculation data for the ground state **1**.

| Transition            | Energy (eV) | Wavelength (nm) | Osc. Strength | Contributions                                         |
|-----------------------|-------------|-----------------|---------------|-------------------------------------------------------|
| $S_0 \rightarrow S_1$ | 2.8054      | 442             | 0.3643        | H $\rightarrow$ L (95%)                               |
| $S_0 \rightarrow S_2$ | 3.1153      | 398             | 0.1153        | H-1 $\rightarrow$ L (95%)                             |
| $S_0 \rightarrow S_3$ | 3.1963      | 388             | 0.0685        | H-2 $\rightarrow$ L (95%)<br>H $\rightarrow$ L+2 (2%) |
| $S_0 \rightarrow S_4$ | 3.2576      | 381             | 0.0645        | H-3 $\rightarrow$ L (6%)<br>H $\rightarrow$ L+1 (91%) |

|                       |        |     |        |                                                                                     |
|-----------------------|--------|-----|--------|-------------------------------------------------------------------------------------|
| $S_0 \rightarrow S_5$ | 3.5688 | 347 | 0.0011 | H-3 $\rightarrow$ L (84%)<br>H-2 $\rightarrow$ L+1 (8%)<br>H $\rightarrow$ L+1 (4%) |
|-----------------------|--------|-----|--------|-------------------------------------------------------------------------------------|

**Table S6.** TD-DFT calculation data for the ground state **TB(phen)**.

| Transition            | Energy (eV) | Wavelength (nm) | Osc. Strength | Contributions                                                                     |
|-----------------------|-------------|-----------------|---------------|-----------------------------------------------------------------------------------|
| $S_0 \rightarrow S_1$ | 2.7959      | 443             | 0.6236        | H $\rightarrow$ L (98%)                                                           |
| $S_0 \rightarrow S_2$ | 3.2694      | 379             | 0.0239        | H-1 $\rightarrow$ L (83%)<br>H $\rightarrow$ L+1 (14%)                            |
| $S_0 \rightarrow S_3$ | 3.3129      | 374             | 0.0015        | H-3 $\rightarrow$ L (95%)<br>H-2 $\rightarrow$ L (3%)                             |
| $S_0 \rightarrow S_4$ | 3.3924      | 365             | 0.0558        | H-3 $\rightarrow$ L (3%)<br>H-2 $\rightarrow$ L (87%)<br>H $\rightarrow$ L+2 (9%) |
| $S_0 \rightarrow S_5$ | 3.6850      | 336             | 0.0016        | H-6 $\rightarrow$ L (97%)                                                         |

**Table S7.** Cartesian coordinates of the DFT optimized ground state structure of **2**.

| Center<br>Number | Atom | Coordinates (Angstroms) |           |           |
|------------------|------|-------------------------|-----------|-----------|
|                  |      | X                       | Y         | Z         |
| 1                | C    | -1.132517               | 0.494647  | 0.000070  |
| 2                | C    | -0.763543               | -0.889816 | -0.000040 |
| 3                | C    | 1.132604                | 0.494591  | 0.000207  |
| 4                | C    | 0.763495                | -0.889844 | 0.000024  |
| 5                | N    | 1.662995                | -1.834448 | -0.000347 |
| 6                | N    | -1.663058               | -1.834355 | 0.000236  |
| 7                | C    | -5.323752               | -2.112875 | 0.000348  |
| 8                | C    | -5.746273               | -0.770725 | -0.000183 |
| 9                | C    | -4.814643               | 0.253985  | -0.000549 |
| 10               | C    | -3.431290               | -0.016732 | -0.000229 |
| 11               | C    | -2.992966               | -1.398443 | 0.000109  |
| 12               | C    | -3.973966               | -2.414973 | 0.000438  |
| 13               | H    | -6.058396               | -2.912048 | 0.000412  |
| 14               | H    | -6.806388               | -0.536753 | -0.000166 |
| 15               | H    | -5.150316               | 1.286603  | -0.000776 |
| 16               | H    | -3.627324               | -3.443173 | 0.000762  |
| 17               | C    | 2.992906                | -1.398499 | -0.000305 |
| 18               | C    | 3.431250                | -0.016760 | 0.000133  |
| 19               | C    | 4.814610                | 0.253973  | 0.000527  |
| 20               | C    | 5.746250                | -0.770727 | 0.000324  |
| 21               | C    | 5.323747                | -2.112926 | -0.000254 |
| 22               | C    | 3.973949                | -2.415028 | -0.000562 |
| 23               | H    | 5.150261                | 1.286606  | 0.001043  |
| 24               | H    | 6.806366                | -0.536750 | 0.000661  |
| 25               | H    | 6.058433                | -2.912058 | -0.000446 |
| 26               | H    | 3.627275                | -3.443213 | -0.000877 |
| 27               | C    | 0.000001                | 2.686851  | -0.000085 |
| 28               | C    | 1.327142                | 3.253298  | -0.000324 |
| 29               | C    | 2.467925                | 2.455341  | -0.000004 |
| 30               | H    | 1.453624                | 4.332336  | -0.000456 |
| 31               | H    | 3.433648                | 2.951019  | -0.000210 |
| 32               | C    | 0.000065                | 1.304218  | -0.000006 |
| 33               | C    | -1.327123               | 3.253286  | 0.000171  |
| 34               | H    | -1.453638               | 4.332299  | 0.000229  |
| 35               | C    | -2.467854               | 2.455291  | 0.000034  |
| 36               | H    | -3.433623               | 2.950889  | -0.000227 |
| 37               | C    | -2.407989               | 1.011396  | 0.000091  |
| 38               | C    | 2.408057                | 1.011450  | 0.000203  |

**Table S8.** Cartesian coordinates of the DFT optimized ground state structure of **1**.

| Center<br>Number | Atom | Coordinates (Angstroms) |           |           |
|------------------|------|-------------------------|-----------|-----------|
|                  |      | X                       | Y         | Z         |
| 1                | C    | 1.127520                | -0.412705 | 0.000033  |
| 2                | C    | 0.759096                | 0.969509  | -0.000057 |
| 3                | C    | -1.127525               | -0.412712 | -0.000079 |
| 4                | C    | -0.759100               | 0.969511  | -0.000088 |
| 5                | N    | -1.661138               | 1.912665  | -0.000065 |
| 6                | N    | 1.661141                | 1.912649  | -0.000170 |
| 7                | C    | 5.334974                | 2.192012  | 0.000098  |
| 8                | C    | 5.738612                | 0.847102  | 0.000261  |
| 9                | C    | 4.811477                | -0.178192 | 0.000363  |
| 10               | C    | 3.434050                | 0.113647  | 0.000208  |
| 11               | C    | 2.985983                | 1.490413  | 0.000025  |
| 12               | C    | 3.983050                | 2.520924  | 0.000018  |
| 13               | H    | 6.088644                | 2.968938  | 0.000126  |
| 14               | H    | 6.799612                | 0.617358  | 0.000341  |
| 15               | H    | 5.141876                | -1.211486 | 0.000418  |
| 16               | C    | -2.985976               | 1.490410  | 0.000011  |
| 17               | C    | -3.434007               | 0.113629  | 0.000140  |
| 18               | C    | -4.811434               | -0.178226 | 0.000369  |
| 19               | C    | -5.738603               | 0.847043  | 0.000437  |
| 20               | C    | -5.334998               | 2.191963  | 0.000218  |
| 21               | C    | -3.983081               | 2.520895  | -0.000010 |
| 22               | H    | -5.141791               | -1.211536 | 0.000530  |
| 23               | H    | -6.799597               | 0.617268  | 0.000631  |
| 24               | H    | -6.088671               | 2.968886  | 0.000227  |
| 25               | C    | -0.000001               | -2.625172 | -0.000032 |
| 26               | C    | -1.350044               | -3.154134 | -0.000103 |
| 27               | C    | -2.483172               | -2.345183 | -0.000068 |
| 28               | H    | -3.446947               | -2.840546 | -0.000116 |
| 29               | C    | 0.000006                | -1.234497 | -0.000092 |
| 30               | C    | 1.350079                | -3.154109 | 0.000064  |
| 31               | C    | 2.483189                | -2.345150 | 0.000157  |
| 32               | H    | 3.446954                | -2.840536 | 0.000207  |
| 33               | C    | 2.407493                | -0.910197 | 0.000186  |
| 34               | C    | -2.407492               | -0.910226 | 0.000017  |
| 35               | O    | 3.514482                | 3.790921  | -0.000045 |
| 36               | O    | -3.514538               | 3.790904  | -0.000239 |
| 37               | C    | 4.455091                | 4.863254  | -0.000377 |
| 38               | H    | 3.860560                | 5.776728  | -0.000562 |
| 39               | H    | 5.087953                | 4.840863  | 0.894002  |
| 40               | H    | 5.087827                | 4.840426  | -0.894833 |
| 41               | C    | -4.455188               | 4.863199  | -0.000145 |
| 42               | H    | -5.087828               | 4.840627  | 0.894386  |
| 43               | H    | -3.860693               | 5.776697  | -0.000324 |



|    |    |           |           |           |
|----|----|-----------|-----------|-----------|
| 44 | H  | -5.088147 | 4.840503  | -0.894446 |
| 45 | Cl | 1.646634  | -4.888639 | -0.000030 |
| 46 | Cl | -1.646595 | -4.888657 | -0.000322 |

**Table S9.** Cartesian coordinates of the DFT optimized ground state structure of **TB(phen)**.

| Center<br>Number | Atom | Coordinates (Angstroms) |           |           |
|------------------|------|-------------------------|-----------|-----------|
|                  |      | X                       | Y         | Z         |
| 1                | C    | 3.569936                | 2.072760  | -0.048077 |
| 2                | C    | 2.871002                | 0.847027  | -0.020124 |
| 3                | C    | 1.447095                | 0.867212  | -0.008663 |
| 4                | C    | 0.738630                | 2.105137  | -0.014026 |
| 5                | C    | 2.877585                | 3.268543  | -0.063808 |
| 6                | C    | 0.744003                | -0.394708 | 0.006254  |
| 7                | C    | -0.738613               | 2.105157  | 0.014127  |
| 8                | C    | -1.447091               | 0.867220  | 0.008522  |
| 9                | C    | -0.744002               | -0.394708 | -0.006596 |
| 10               | C    | -2.870990               | 0.847019  | 0.019980  |
| 11               | H    | 4.653126                | 2.085634  | -0.059007 |
| 12               | H    | 3.421285                | 4.207744  | -0.089075 |
| 13               | C    | 3.538774                | -0.439400 | -0.001740 |
| 14               | C    | 2.720630                | -1.604754 | 0.026675  |
| 15               | C    | -3.538783               | -0.439403 | 0.001766  |
| 16               | C    | -2.720644               | -1.604735 | -0.026932 |
| 17               | C    | -1.477026               | 3.287342  | 0.046499  |
| 18               | H    | -0.978978               | 4.248822  | 0.061632  |
| 19               | C    | 1.477037                | 3.287337  | -0.046359 |
| 20               | H    | 0.978974                | 4.248808  | -0.061493 |
| 21               | N    | 1.350539                | -1.558003 | 0.027506  |
| 22               | N    | -1.350550               | -1.557969 | -0.027950 |
| 23               | C    | -4.698135               | -3.016817 | -0.045371 |
| 24               | H    | -5.154337               | -4.001771 | -0.063391 |
| 25               | C    | -3.324584               | -2.886324 | -0.051331 |
| 26               | H    | -2.669268               | -3.750869 | -0.073313 |
| 27               | C    | -5.511249               | -1.865185 | -0.014619 |
| 28               | H    | -6.592100               | -1.967253 | -0.008939 |
| 29               | C    | -4.942810               | -0.604150 | 0.008309  |
| 30               | H    | -5.592840               | 0.263293  | 0.031020  |
| 31               | C    | -3.569951               | 2.072778  | 0.047974  |
| 32               | H    | -4.653141               | 2.085616  | 0.058789  |
| 33               | C    | -2.877582               | 3.268552  | 0.063772  |
| 34               | H    | -3.421256               | 4.207772  | 0.088886  |
| 35               | C    | 5.511255                | -1.865173 | 0.015262  |
| 36               | C    | 4.698132                | -3.016817 | 0.045549  |
| 37               | C    | 3.324586                | -2.886334 | 0.051052  |
| 38               | C    | 4.942805                | -0.604143 | -0.007786 |
| 39               | H    | 6.592107                | -1.967242 | 0.010078  |

|    |   |          |           |           |
|----|---|----------|-----------|-----------|
| 40 | H | 5.154338 | -4.001769 | 0.063616  |
| 41 | H | 2.669261 | -3.750883 | 0.072667  |
| 42 | H | 5.592833 | 0.263310  | -0.030224 |

**Table S10.** Cartesian coordinates of the DFT optimized structure in excited state  $S_1$  of **2**.

| Center<br>Number | Atom | Coordinates (Angstroms) |             |             |
|------------------|------|-------------------------|-------------|-------------|
|                  |      | X                       | Y           | Z           |
| 1                | C    | 1.11437300              | 0.48252000  | -0.00001800 |
| 2                | C    | 0.72858600              | -0.92208100 | -0.00001600 |
| 3                | C    | -1.11437300             | 0.48252100  | -0.00001900 |
| 4                | C    | -0.72858100             | -0.92208300 | -0.00002800 |
| 5                | N    | -1.67627000             | -1.86318000 | -0.00003100 |
| 6                | N    | 1.67627800              | -1.86317800 | -0.00000300 |
| 7                | C    | 5.33859700              | -2.08280100 | 0.00002400  |
| 8                | C    | 5.76152900              | -0.73905200 | 0.00003300  |
| 9                | C    | 4.81248400              | 0.26884700  | 0.00002700  |
| 10               | C    | 3.42824800              | -0.01662600 | 0.00001400  |
| 11               | C    | 2.98144100              | -1.40854900 | 0.00001200  |
| 12               | C    | 3.98898800              | -2.40259100 | 0.00001300  |
| 13               | H    | 6.07625400              | -2.87995600 | 0.00002600  |
| 14               | H    | 6.81892500              | -0.49675000 | 0.00004300  |
| 15               | H    | 5.13268900              | 1.30693700  | 0.00003300  |
| 16               | H    | 3.66308400              | -3.43753500 | 0.00000700  |
| 17               | C    | -2.98143400             | -1.40855400 | -0.00002400 |
| 18               | C    | -3.42824500             | -0.01663000 | -0.00001400 |
| 19               | C    | -4.81248400             | 0.26884000  | -0.00001700 |
| 20               | C    | -5.76152500             | -0.73906100 | -0.00002600 |
| 21               | C    | -5.33858900             | -2.08280900 | -0.00003200 |
| 22               | C    | -3.98897800             | -2.40259600 | -0.00003200 |
| 23               | H    | -5.13269200             | 1.30693000  | -0.00001900 |
| 24               | H    | -6.81892200             | -0.49676300 | -0.00003100 |
| 25               | H    | -6.07624300             | -2.87996600 | -0.00003800 |
| 26               | H    | -3.66307300             | -3.43754000 | -0.00003800 |
| 27               | C    | -0.00000600             | 2.69720700  | 0.00001200  |
| 28               | C    | -1.31512900             | 3.25487900  | 0.00004900  |
| 29               | C    | -2.46641300             | 2.43610600  | 0.00003500  |
| 30               | H    | -1.45569400             | 4.33177800  | 0.00007100  |
| 31               | H    | -3.43029800             | 2.93462100  | 0.00005700  |
| 32               | C    | -0.00000400             | 1.30421300  | -0.00002000 |
| 33               | C    | 1.31511000              | 3.25488100  | 0.00001600  |
| 34               | H    | 1.45567700              | 4.33177900  | 0.00004100  |
| 35               | C    | 2.46640100              | 2.43610600  | 0.00001700  |
| 36               | H    | 3.43028300              | 2.93462700  | 0.00003400  |
| 37               | C    | 2.41189700              | 1.00918600  | 0.00000500  |
| 38               | C    | -2.41190200             | 1.00918300  | -0.00000100 |

**Table S11.** Cartesian coordinates of the DFT optimized structure in excited state S<sub>1</sub> of **1**.

| Center<br>Number | Atom | Coordinates (Angstroms) |             |             |
|------------------|------|-------------------------|-------------|-------------|
|                  |      | X                       | Y           | Z           |
| 1                | C    | 1.11727300              | 0.41312300  | 0.00002200  |
| 2                | C    | 0.73383900              | -0.96782100 | 0.00005900  |
| 3                | C    | -1.11726500             | 0.41312800  | 0.00001300  |
| 4                | C    | -0.73383900             | -0.96781700 | 0.00004200  |
| 5                | N    | -1.67210200             | -1.93266300 | 0.00004800  |
| 6                | N    | 1.67209600              | -1.93267100 | 0.00008600  |
| 7                | C    | 5.35164800              | -2.19156400 | 0.00010300  |
| 8                | C    | 5.75017400              | -0.85145100 | 0.00006100  |
| 9                | C    | 4.80017100              | 0.16737500  | 0.00002400  |
| 10               | C    | 3.42197300              | -0.11833300 | 0.00002600  |
| 11               | C    | 2.96281700              | -1.49813700 | 0.00007300  |
| 12               | C    | 3.99266300              | -2.52237100 | 0.00011100  |
| 13               | H    | 6.10246400              | -2.97144100 | 0.00012700  |
| 14               | H    | 6.80733100              | -0.60804900 | 0.00005800  |
| 15               | H    | 5.12776300              | 1.20218800  | -0.00000100 |
| 16               | C    | -2.96282000             | -1.49812100 | 0.00002200  |
| 17               | C    | -3.42196800             | -0.11831500 | -0.00001800 |
| 18               | C    | -4.80016500             | 0.16740100  | -0.00004900 |
| 19               | C    | -5.75017500             | -0.85141800 | -0.00003700 |
| 20               | C    | -5.35165800             | -2.19153300 | 0.00000900  |
| 21               | C    | -3.99267600             | -2.52234700 | 0.00003800  |
| 22               | H    | -5.12774900             | 1.20221700  | -0.00008400 |
| 23               | H    | -6.80733100             | -0.60800900 | -0.00006000 |
| 24               | H    | -6.10247800             | -2.97140700 | 0.00002200  |
| 25               | C    | 0.00001000              | 2.64432600  | -0.00006800 |
| 26               | C    | -1.34286800             | 3.16436400  | -0.00009200 |
| 27               | C    | -2.47990900             | 2.34414500  | -0.00007300 |
| 28               | H    | -3.44383100             | 2.83970800  | -0.00009800 |
| 29               | C    | 0.00000600              | 1.24353600  | -0.00000300 |
| 30               | C    | 1.34289100              | 3.16435700  | -0.00010600 |
| 31               | C    | 2.47992700              | 2.34413200  | -0.00007700 |
| 32               | H    | 3.44385200              | 2.83969000  | -0.00011200 |
| 33               | C    | 2.40219600              | 0.91384700  | -0.00000900 |
| 34               | C    | -2.40218500             | 0.91386000  | -0.00002600 |
| 35               | O    | 3.53616300              | -3.78359600 | 0.00015100  |
| 36               | O    | -3.53619700             | -3.78357700 | 0.00008400  |
| 37               | C    | 4.46578700              | -4.87160800 | 0.00023900  |
| 38               | H    | 3.85695700              | -5.77463000 | 0.00031400  |
| 39               | H    | 5.09501600              | -4.85025700 | -0.89526300 |
| 40               | H    | 5.09502200              | -4.85010900 | 0.89573200  |
| 41               | C    | -4.46585000             | -4.87156400 | 0.00008200  |
| 42               | H    | -5.09506200             | -4.85013500 | -0.89543000 |
| 43               | H    | -3.85704400             | -5.77460200 | 0.00011200  |

|    |    |             |             |             |
|----|----|-------------|-------------|-------------|
| 44 | H  | -5.09510100 | -4.85010400 | 0.89556500  |
| 45 | Cl | 1.65443400  | 4.89742200  | -0.00019100 |
| 46 | Cl | -1.65440200 | 4.89743100  | -0.00015600 |

**Table S12.** Cartesian coordinates of the DFT optimized structure in excited state S<sub>1</sub> of **TB(phen)**.

| Center<br>Number | Atom | Coordinates (Angstroms) |             |             |
|------------------|------|-------------------------|-------------|-------------|
|                  |      | X                       | Y           | Z           |
| 1                | C    | -3.54685200             | 2.07029500  | 0.02503500  |
| 2                | C    | -2.85539300             | 0.84774700  | 0.00984300  |
| 3                | C    | -1.42776400             | 0.86012700  | 0.00414500  |
| 4                | C    | -0.72101200             | 2.10812200  | 0.00744300  |
| 5                | C    | -2.85712300             | 3.28974500  | 0.03521500  |
| 6                | C    | -0.72363200             | -0.38643600 | -0.00346900 |
| 7                | C    | 0.72101200              | 2.10812200  | -0.00744300 |
| 8                | C    | 1.42776400              | 0.86012700  | -0.00414600 |
| 9                | C    | 0.72363200              | -0.38643600 | 0.00346700  |
| 10               | C    | 2.85539300              | 0.84774700  | -0.00984300 |
| 11               | H    | -4.63032500             | 2.08430700  | 0.03101600  |
| 12               | H    | -3.41388900             | 4.22088500  | 0.05052000  |
| 13               | C    | -3.52703500             | -0.43890400 | 0.00045400  |
| 14               | C    | -2.69501700             | -1.61738600 | -0.01438500 |
| 15               | C    | 3.52703500              | -0.43890400 | -0.00045300 |
| 16               | C    | 2.69501700              | -1.61738600 | 0.01438400  |
| 17               | C    | 1.47547800              | 3.31355200  | -0.02638200 |
| 18               | H    | 0.97248300              | 4.27186600  | -0.03809000 |
| 19               | C    | -1.47547800             | 3.31355200  | 0.02638200  |
| 20               | H    | -0.97248300             | 4.27186600  | 0.03808900  |
| 21               | N    | -1.34939500             | -1.58625300 | -0.01539500 |
| 22               | N    | 1.34939500              | -1.58625300 | 0.01539100  |
| 23               | C    | 4.69439800              | -3.01964500 | 0.02382300  |
| 24               | H    | 5.15861100              | -4.00132100 | 0.03305900  |
| 25               | C    | 3.32467900              | -2.90188600 | 0.02721700  |
| 26               | H    | 2.67604200              | -3.77169500 | 0.03876200  |
| 27               | C    | 5.50512100              | -1.86026200 | 0.00777100  |
| 28               | H    | 6.58640700              | -1.95602100 | 0.00459700  |
| 29               | C    | 4.92602100              | -0.60062700 | -0.00380200 |
| 30               | H    | 5.57395800              | 0.26910000  | -0.01553500 |
| 31               | C    | 3.54685200              | 2.07029500  | -0.02503500 |
| 32               | H    | 4.63032500              | 2.08430700  | -0.03101700 |
| 33               | C    | 2.85712300              | 3.28974500  | -0.03521500 |
| 34               | H    | 3.41388900              | 4.22088500  | -0.05052100 |
| 35               | C    | -5.50512100             | -1.86026200 | -0.00776600 |
| 36               | C    | -4.69439800             | -3.01964500 | -0.02382200 |
| 37               | C    | -3.32467900             | -2.90188600 | -0.02721900 |
| 38               | C    | -4.92602100             | -0.60062700 | 0.00380600  |
| 39               | H    | -6.58640700             | -1.95602100 | -0.00459000 |

|    |   |             |             |             |
|----|---|-------------|-------------|-------------|
| 40 | H | -5.15861100 | -4.00132100 | -0.03305900 |
| 41 | H | -2.67604200 | -3.77169500 | -0.03876600 |
| 42 | H | -5.57395800 | 0.26910000  | 0.01554200  |

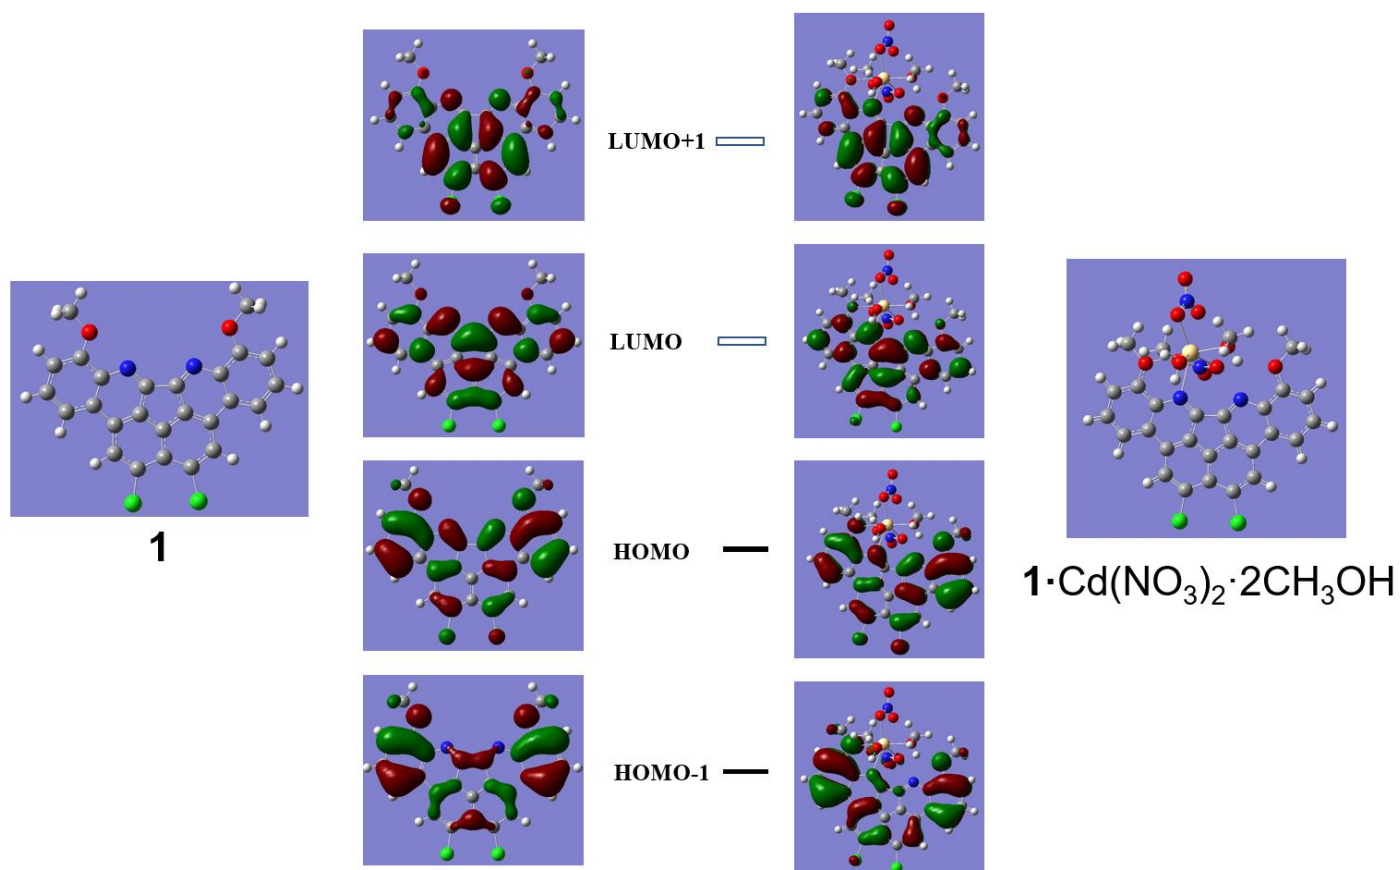

**Figure S76.** Molecular orbitals of **1** and  $\text{1} \cdot \text{Cd}(\text{NO}_3)_2 \cdot 2\text{CH}_3\text{OH}$ .

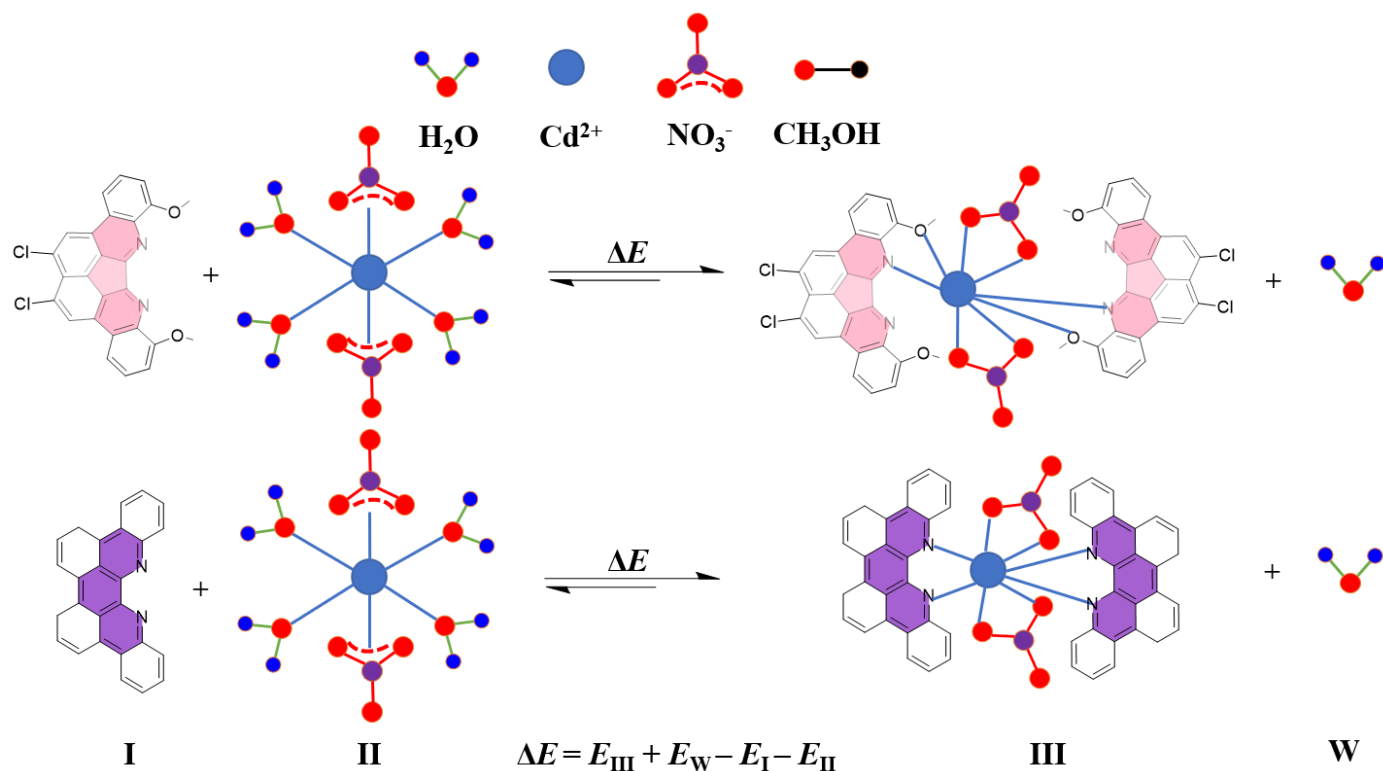

**Figure S77.** Complexation equilibria between  $\text{Cd}(\text{NO}_3)_2 \cdot 4\text{H}_2\text{O}$  and **1** or **TB(phen)** with 2:1 ratio.

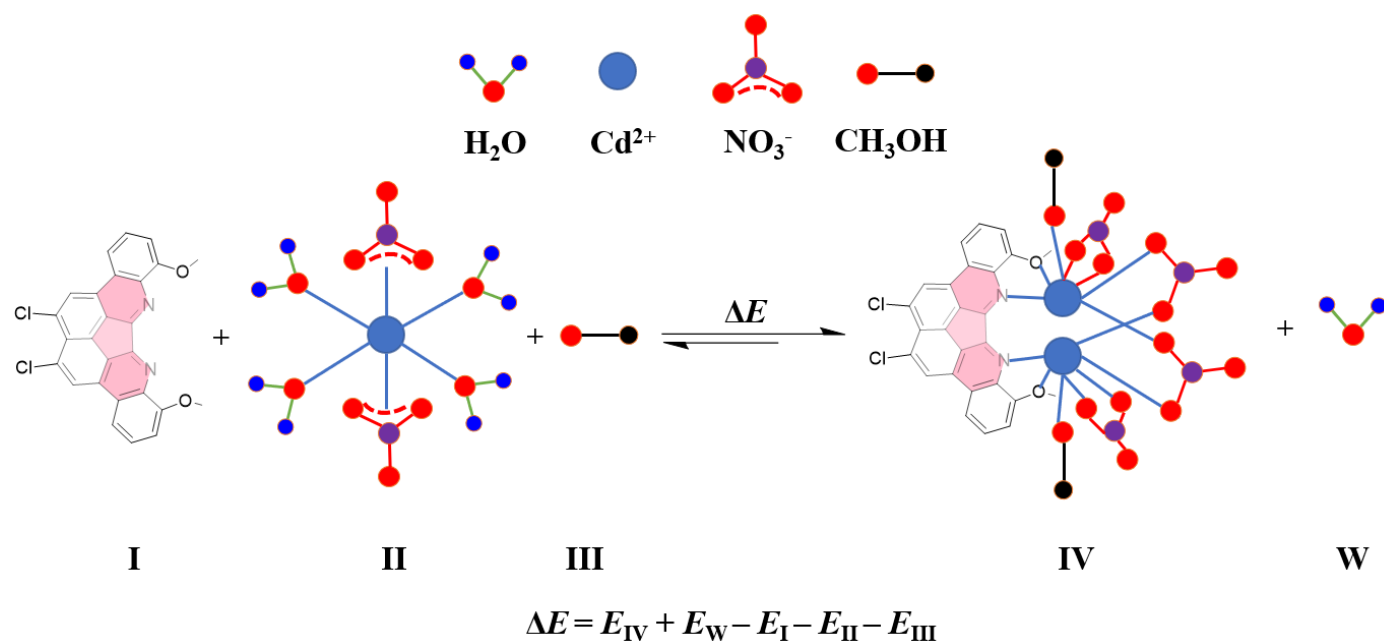

**Figure S78.** Complexation equilibriums between  $\text{Cd}(\text{NO}_3)_2 \cdot 4\text{H}_2\text{O}$  and **1** with 1:2 ratio.

**Section S7:** Protonation study of **1** in CH<sub>2</sub>Cl<sub>2</sub>/CH<sub>3</sub>OH (4:1, v/v)

*General procedure for the Uv-vis and fluorescence spectral studies*

In this case, 2000  $\mu\text{L}$  of **1** ( $2.00 \times 10^{-5}$  M in CH<sub>2</sub>Cl<sub>2</sub>/CH<sub>3</sub>OH (4:1, v/v)) was added to quartz cell. The tested trifluoroacetic acid (CF<sub>3</sub>SO<sub>3</sub>H,  $4.00 \times 10^{-2}$  M in CH<sub>2</sub>Cl<sub>2</sub>/CH<sub>3</sub>OH (4:1, v/v)) was stepwise added and fully mixed for further detection. All data were collected after each aliquot was added and mixed.

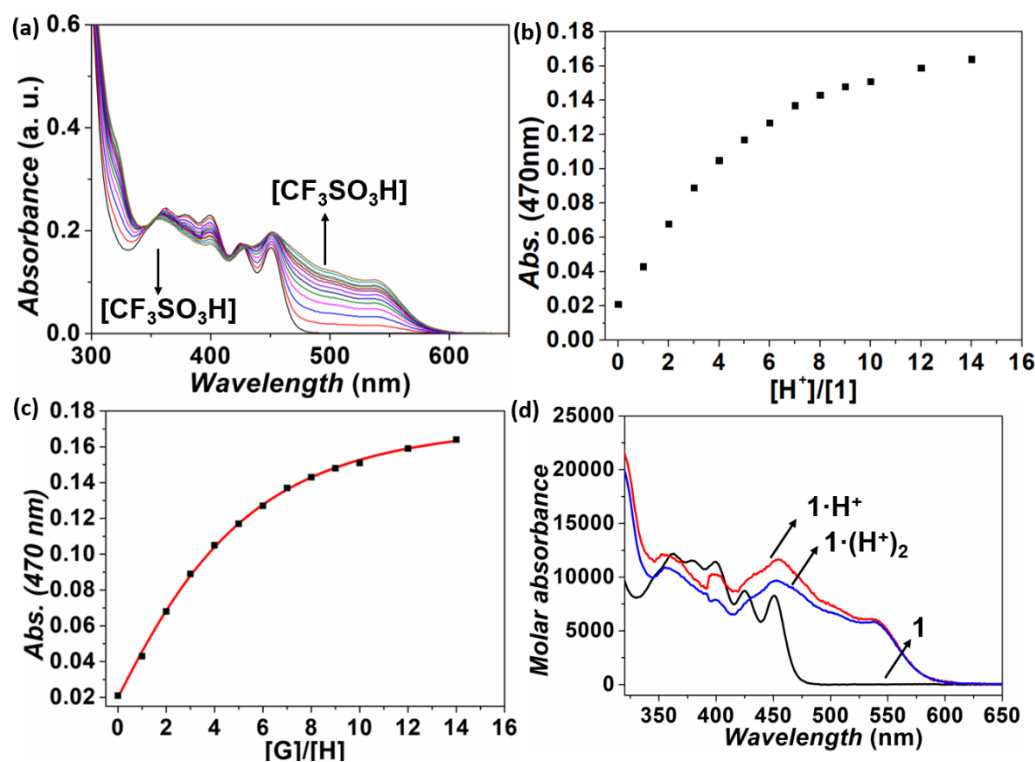

**Figure S79.** (a) Uv-vis spectra recorded for corresponding to **1** ( $2.00 \times 10^{-5}$  M in CH<sub>2</sub>Cl<sub>2</sub>/CH<sub>3</sub>OH (4:1, v/v)) with increasing [CF<sub>3</sub>SO<sub>3</sub>H] (G: from 0 to 20 molar equiv.) at 298 K. (b) The absorbance changes at 470 nm (“■”). And (c) the results of the corresponding nonlinear curve fitting according calculated model (red line) Hyperquad 2003. (d) The calculated molar absorbance of **1** and its protonated products. The equilibriums and related  $K_a$  calculation results as shown:  $2\text{M} + \text{L} \xrightleftharpoons{K_2} \text{M}_2\text{L}$ ;  $\log K_2 = 8.0(5)$ ;  $\text{M} + \text{L} \xrightleftharpoons{K_1} \text{ML}$ ;  $\log K_1 = 3.9(5)$ .

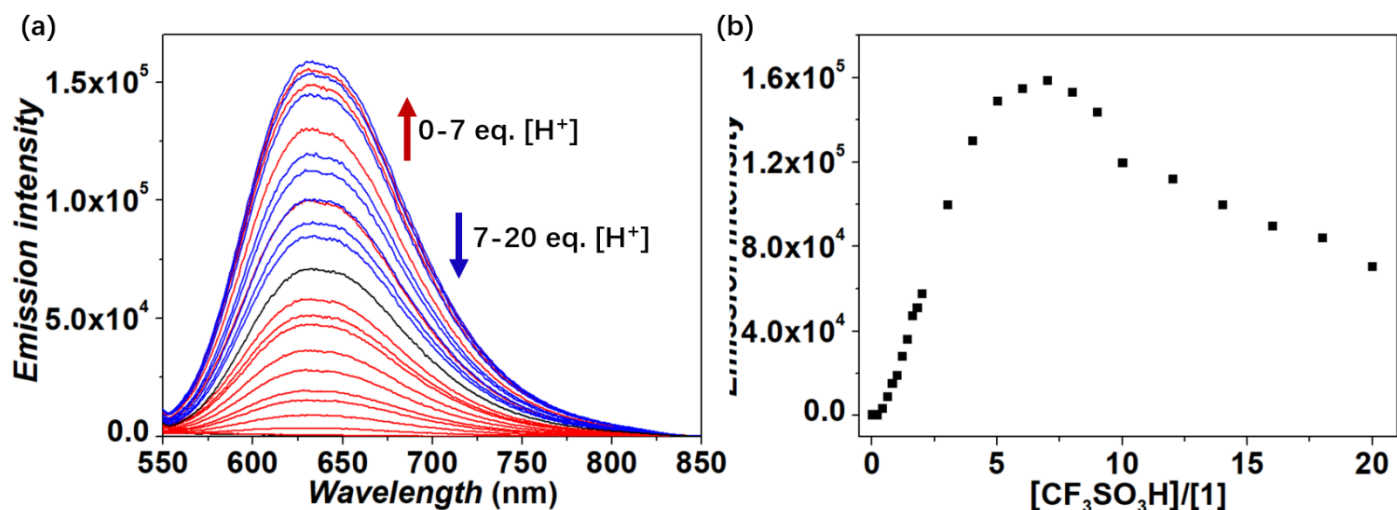

**Figure S80.** (a) Fluorescent emission spectra corresponding to **1** ( $2.00 \times 10^{-5}$  M in  $CH_2Cl_2/CH_3OH$  (4:1, v/v)) with increasing  $[CF_3SO_3H]$  (from 0 to 20.0 molar equiv.) at 298 K. (b) The fluorescence intensity changes at 630 nm (“■”) ( $\lambda_{ex} = 540$  nm, voltage = 400 V, entrance slit width = 9 nm, exit slit width = 9 nm).

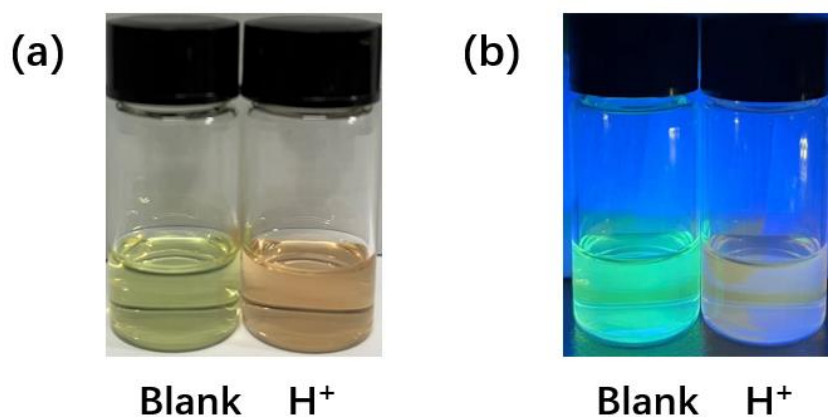

**Figure S81.** Photographs of **1** ( $2.00 \times 10^{-5}$  M) coordination with  $CF_3SO_3H$  (20 molar equiv.) in  $CH_2Cl_2/CH_3OH$  (4:1, v/v) under (a) visible light and (b) 365 nm UV light, respectively.



## Reference

- (1) H. E. Gottlieb, V. Kotlyar, A. Nudelman, *J. Org. Chem.*, 1997, **62**, 7512-7515.
- (2) G. M. Sheldrick, *SHELXL97*. Program for the Refinement of Crystal Structures, University of Göttingen, Göttingen, 1994.
- (3) O. V. Dolomanov, L. J. Bourhis, R. J. Gildea, J. A. K. Howard, *J. Appl. Cryst.*, 2009, **42**, 339-341.
- (4) G. M. Sheldrick, *Acta Cryst. A.*, 2015, **71**, 3-8.
- (5)  $R_w(F^2) = \{w(|F_o|^2 - |F_c|^2)^2 / w(|F_o|^4)\}^{1/2}$  where  $w$  is the weight given each reflection.  $R(F) = (|F_o| - |F_c|) / |F_o|$  for reflections with  $F_o > 4(F_c)$ .  $S = [w(|F_o|^2 - |F_c|^2)^2 / (n - p)]^{1/2}$ , where  $n$  is the number of reflections and  $p$  is the number of refined parameters.
- (6) Y. Fei, Y. Fu, X. Bai, L. Du, Z. Li, H. Komber, K.-H. Low, S. Zhou, D. L. Phillips, X. Feng and J. Liu, *J. Am. Chem. Soc.*, 2021, **143**, 2353.
- (7) T. Ishiyama, M. Murata and N. Miyaura, *J. Org. Chem.*, 1995, **60**, 7508.
- (8) Gaussian 09, Revision D.01, M. J. Frisch, G. W. Trucks, H. B. Schlegel, G. E. Scuseria, M. A. Robb, J. R. Cheeseman, G. Scalmani, V. Barone, B. Mennucci, G. A. Petersson, H. Nakatsuji, M. Caricato, X. Li, H. P. Hratchian, A. F. Izmaylov, J. Bloino, G. Zheng, Sonnenberg, J. L.; Hada, M.; Ehara, M.; Toyota, K.; Fukuda, R.; Hasegawa, J.; Ishida, M.; T. Nakajima, Y. Honda, O. Kitao, H. Nakai, T. Vreven, J. A. Montgomery, J. E. Peralta, F. Ogliaro, M. Bearpark, J. J. Heyd, E. Brothers, K. N. Kudin, V. N. Staroverov, R. Kobayashi, J. Normand, K. Raghavachari, A. Rendell, J. C. Burant, S. S. Iyengar, J. Tomasi, M. Cossi, N. Rega, M. J. Millam, M. Klene, J. E. Knox, J. B. Cross, V. Bakken, C. Adamo, J. Jaramillo, R. Gomperts, R. E. Stratmann, O. Yazyev, A. J. Austin, R. Cammi, C. Pomelli, J. W. Ochterski, R. L. Martin, K. Morokuma, V. G. Zakrzewski, G. A. Voth, P. Salvador, J. J. Dannenberg, S. Dapprich, A. D. Daniels, Ö. Farkas, J. B. Foresman, J. V. Ortiz, J. Cioslowski, D. J. Fox, Gaussian, Inc., Wallingford CT, 2013.
